# Supplementary material for: An Automated Phenotype-Driven Approach (GeneForce) for Refining Metabolic and Regulatory Models
Source: PLoS Comput Biol. 2010 Oct 28;6(10):e1000970. doi: 10.1371/journal.pcbi.1000970 (PMC2965739; doi:10.1371/journal.pcbi.1000970)
Supplement: Table S1 — Phenotype-model comparison using iJR904 and iMC104 (with Lrp modified regulatory rules). (0.51 MB XLS) [file pcbi.1000970.s003.xls]

## Sheet: iJR904 + iMC104 + Lrp update
Each entry indicates the growth phenotype of a knockout mutant (row) in a given media condition (column). The order corresponds to the results from experiments / metabolic model / integrated model.
M' indicates a metabolic gene knockout mutant and 'R' denotes a regulatory gene knockout mutant.
The results from metabolic model for regulatory gene knockout mutants ('R') are the wildtype growth phenotype predictions in each medai condition.
ASAP Dataset			Media
			C-source
Mutant			arab-L	acgam	glcr	succ	gal	asp-L	pro-L	ala-D	tre	man	galt	ser-D	sbt-D	glyc	fuc-L	glcur	glcn	glyc3p	xyl-D	lac-L	mnl	glu-L	g6p	galctn-D	mal-L; mal-D	rib-D	rmn	fru	ac	glc-D	malt	melib	thymd	asn-L	12ppd-S	akg	lcts	sucr	uri	gln-L	malttr	dad-2	adn	gly;asp-L	cit	fum	galct-D
b3091	uxaA	M	+/+/+	+/+/-	+/+/+	+/+/+	+/+/+	+/+/+	+/+/+	+/+/-	+/+/+	+/+/+	-/+/+	+/+/-	+/+/+	+/+/+	+/+/+	+/+/+	+/+/+	+/+/+	+/+/+	+/+/+	+/+/+	-/+/+	+/+/+	+/+/+	+/+/+	+/+/+	+/+/+	+/+/+	+/+/+	+/+/+	+/+/+	+/+/+	+/-/-	+/+/+	-/+/-	+/+/+	+/+/+	-/+/-	+/+/+	+/+/+	+/+/+	+/+/+	+/+/+	+/+/+	-/+/-	+/+/+	+/+/+
b3093	exuT	M	+/+/+	+/+/-	+/+/+	+/+/+	+/+/+	+/+/+	+/+/+	+/+/-	+/+/+	+/+/+	-/+/+	+/+/-	+/+/+	+/+/+	+/+/+	-/+/+	+/+/+	+/+/+	+/+/+	+/+/+	+/+/+	-/+/+	+/+/+	+/+/+	+/+/+	+/+/+	+/+/+	+/+/+	+/+/+	+/+/+	+/+/+	+/+/+	+/-/-	-/+/+	-/+/-	+/+/+	+/+/+	-/+/-	+/+/+	+/+/+	+/+/+	+/+/+	+/+/+	+/+/+	-/+/-	+/+/+	+/+/+
b3119	tdcR	R	+/+/+	+/+/-	+/+/+	+/+/+	+/+/+	+/+/+	+/+/+	+/+/-	+/+/+	+/+/+	-/+/+	+/+/-	+/+/+	+/+/+	+/+/+	+/+/+	+/+/+	+/+/+	+/+/+	+/+/+	+/+/+	-/+/+	+/+/+	+/+/+	+/+/+	+/+/+	+/+/+	+/+/+	+/+/+	+/+/+	+/+/+	+/+/+	+/-/-	+/+/+	-/+/-	+/+/+	+/+/+	-/+/-	+/+/+	+/+/+	+/+/+	+/+/+	+/+/+	+/+/+	-/+/-	+/+/+	+/+/+
b3132	kbaZ	M	+/+/+	+/+/-	+/+/+	+/+/+	+/+/+	+/+/+	+/+/+	+/+/-	+/+/+	+/+/+	-/+/+	+/+/-	+/+/+	+/+/+	+/+/+	+/+/+	+/+/+	+/+/+	+/+/+	+/+/+	+/+/+	-/+/+	+/+/+	+/+/+	+/+/+	+/+/+	+/+/+	+/+/+	+/+/+	+/+/+	+/+/+	+/+/+	+/-/-	-/+/+	-/+/-	+/+/+	+/+/+	-/+/-	+/+/+	+/+/+	+/+/+	+/+/+	+/+/+	+/+/+	-/+/-	+/+/+	+/+/+
b3137	kbaY	M	+/+/+	+/+/-	+/+/+	+/+/+	+/+/+	+/+/+	+/+/+	+/+/-	+/+/+	+/+/+	-/+/+	+/+/-	+/+/+	+/+/+	+/+/+	+/+/+	+/+/+	+/+/+	+/+/+	+/+/+	+/+/+	-/+/+	+/+/+	+/+/+	+/+/+	+/+/+	+/+/+	+/+/+	+/+/+	+/+/+	+/+/+	+/+/+	+/-/-	-/+/+	-/+/-	+/+/+	+/+/+	-/+/-	+/+/+	+/+/+	+/+/+	+/+/+	+/+/+	+/+/+	-/+/-	+/+/+	+/+/+
b3161	mtr	M	+/+/+	+/+/-	+/+/+	+/+/+	+/+/+	+/+/+	+/+/+	+/+/-	+/+/+	+/+/+	-/+/+	+/+/-	+/+/+	+/+/+	+/+/+	+/+/+	+/+/+	+/+/+	+/+/+	+/+/+	+/+/+	-/+/+	+/+/+	+/+/+	+/+/+	+/+/+	+/+/+	+/+/+	+/+/+	+/+/+	+/+/+	+/+/+	+/-/-	-/+/+	-/+/-	+/+/+	+/+/+	-/+/-	+/+/+	+/+/+	+/+/+	+/+/+	+/+/+	+/+/+	-/+/-	+/+/+	+/+/+
b3172	argG	M	+/-/-	-/-/-	+/-/-	+/-/-	+/-/-	+/-/-	-/-/-	+/-/-	+/-/-	-/-/-	-/-/-	+/-/-	+/-/-	+/-/-	+/-/-	-/-/-	+/-/-	+/-/-	+/-/-	+/-/-	-/-/-	-/-/-	-/-/-	-/-/-	+/-/-	+/-/-	+/-/-	-/-/-	+/-/-	-/-/-	+/-/-	+/-/-	-/-/-	-/-/-	-/-/-	+/-/-	-/-/-	-/-/-	+/-/-	-/-/-	-/-/-	+/-/-	-/-/-	+/-/-	-/-/-	+/-/-	+/-/-
b3213	gltD	M	+/+/+	+/+/-	+/+/+	+/+/+	+/+/+	+/+/+	+/+/+	+/+/-	+/+/+	+/+/+	-/+/+	+/+/-	+/+/+	+/+/+	+/+/+	+/+/+	+/+/+	+/+/+	+/+/+	+/+/+	+/+/+	-/+/+	+/+/+	+/+/+	+/+/+	+/+/+	+/+/+	+/+/+	+/+/+	+/+/+	+/+/+	+/+/+	+/-/-	-/+/+	-/+/-	+/+/+	+/+/+	-/+/-	+/+/+	+/+/+	+/+/+	+/+/+	+/+/+	+/+/+	-/+/-	+/+/+	+/+/+
b3224	nanT	M	+/+/+	+/+/-	+/+/+	+/+/+	+/+/+	+/+/+	+/+/+	+/+/-	+/+/+	+/+/+	-/+/+	+/+/-	+/+/+	+/+/+	+/+/+	+/+/+	+/+/+	+/+/+	+/+/+	+/+/+	+/+/+	-/+/+	+/+/+	+/+/+	+/+/+	+/+/+	+/+/+	+/+/+	+/+/+	+/+/+	+/+/+	+/+/+	+/-/-	-/+/+	-/+/-	+/+/+	+/+/+	-/+/-	+/+/+	+/+/+	+/+/+	+/+/+	+/+/+	+/+/+	-/+/-	+/+/+	+/+/+
b3225	nanA	M	+/+/+	+/+/-	+/+/+	+/+/+	+/+/+	+/+/+	+/+/+	+/+/-	+/+/+	+/+/+	-/+/+	+/+/-	+/+/+	+/+/+	+/+/+	+/+/+	+/+/+	+/+/+	+/+/+	+/+/+	+/+/+	-/+/+	+/+/+	+/+/+	+/+/+	+/+/+	+/+/+	+/+/+	+/+/+	+/+/+	+/+/+	+/+/+	+/-/-	+/+/+	-/+/-	+/+/+	+/+/+	-/+/-	+/+/+	+/+/+	+/+/+	+/+/+	+/+/+	+/+/+	-/+/-	+/+/+	+/+/+
b3236	mdh	M	+/+/+	+/+/-	+/+/+	+/+/+	+/+/+	+/+/+	-/+/+	+/+/-	+/+/+	+/+/+	-/+/+	+/+/-	+/+/+	+/+/+	+/+/+	+/+/+	+/+/+	+/+/+	+/+/+	+/+/+	+/+/+	+/+/+	+/+/+	+/+/+	+/+/+	+/+/+	+/+/+	+/+/+	-/+/+	+/+/+	+/+/+	+/+/+	+/-/-	-/+/+	+/+/-	+/+/+	+/+/+	-/+/-	+/+/+	-/+/+	+/+/+	+/+/+	+/+/+	+/+/+	-/+/-	+/+/+	+/+/+
b3265	acrE	M	+/+/+	+/+/-	+/+/+	+/+/+	+/+/+	+/+/+	+/+/+	+/+/-	+/+/+	+/+/+	-/+/+	+/+/-	+/+/+	+/+/+	+/+/+	+/+/+	+/+/+	+/+/+	+/+/+	+/+/+	+/+/+	-/+/+	+/+/+	+/+/+	+/+/+	+/+/+	+/+/+	+/+/+	+/+/+	+/+/+	+/+/+	+/+/+	+/-/-	+/+/+	-/+/-	+/+/+	+/+/+	-/+/-	+/+/+	+/+/+	+/+/+	+/+/+	+/+/+	+/+/+	-/+/-	+/+/+	+/+/+
b3357	crp	R	+/+/+	+/+/-	+/+/+	+/+/+	+/+/+	+/+/+	-/+/+	+/+/-	+/+/+	+/+/+	-/+/+	+/+/-	+/+/+	+/+/+	+/+/+	+/+/+	+/+/+	+/+/-	+/+/+	+/+/+	+/+/+	-/+/+	+/+/+	+/+/+	+/+/+	+/+/+	+/+/+	+/+/+	+/+/+	+/+/+	+/+/+	+/+/+	+/-/-	-/+/+	-/+/-	+/+/+	+/+/+	-/+/-	+/+/+	-/+/+	+/+/+	+/+/+	+/+/+	+/+/+	-/+/-	+/+/+	+/+/+
b3359	argD	M	+/-/-	+/-/-	+/-/-	+/-/-	+/-/-	+/-/-	+/-/-	+/-/-	+/-/-	+/-/-	-/-/-	+/-/-	+/-/-	+/-/-	+/-/-	+/-/-	+/-/-	+/-/-	+/-/-	+/-/-	+/-/-	-/-/-	+/-/-	+/-/-	+/-/-	+/-/-	+/-/-	+/-/-	+/-/-	+/-/-	+/-/-	+/-/-	+/-/-	+/-/-	-/-/-	+/-/-	+/-/-	-/-/-	+/-/-	+/-/-	+/-/-	+/-/-	+/-/-	+/-/-	-/-/-	+/-/-	+/-/-
b3403	pck	M	+/+/+	+/+/-	+/+/+	+/+/+	+/+/+	+/+/+	-/+/+	+/+/-	+/+/+	+/+/+	-/+/+	+/+/-	+/+/+	+/+/+	+/+/+	+/+/+	+/+/+	+/+/+	+/+/+	+/+/+	+/+/+	-/+/+	+/+/+	+/+/+	+/+/+	+/+/+	+/+/+	+/+/+	+/+/+	+/+/+	+/+/+	+/+/+	+/-/-	-/+/+	-/+/-	+/+/+	+/+/+	-/+/-	+/+/+	+/+/+	+/+/+	+/+/+	+/+/+	+/+/+	-/+/-	+/+/+	+/+/+
b3409	feoB	M	+/+/+	+/+/-	+/+/+	+/+/+	+/+/+	+/+/+	-/+/+	+/+/-	+/+/+	+/+/+	-/+/+	+/+/-	+/+/+	+/+/+	+/+/+	+/+/+	+/+/+	+/+/+	+/+/+	+/+/+	+/+/+	-/+/+	+/+/+	+/+/+	+/+/+	+/+/+	+/+/+	+/+/+	+/+/+	+/+/+	+/+/+	+/+/+	+/-/-	+/+/+	-/+/-	+/+/+	+/+/+	-/+/-	+/+/+	+/+/+	+/+/+	+/+/+	+/+/+	+/+/+	-/+/-	+/+/+	+/+/+
b3415	gntT	M	+/+/+	+/+/-	+/+/+	+/+/+	+/+/+	+/+/+	-/+/+	+/+/-	+/+/+	+/+/+	-/+/+	+/+/-	+/+/+	+/+/+	+/+/+	+/+/+	+/+/+	+/+/+	+/+/+	+/+/+	+/+/+	-/+/+	+/+/+	+/+/+	+/+/+	+/+/+	+/+/+	+/+/+	+/+/+	+/+/+	+/+/+	+/+/+	+/-/-	+/+/+	-/+/-	+/+/+	+/+/+	-/+/-	+/+/+	+/+/+	+/+/+	+/+/+	+/+/+	+/+/+	-/+/-	+/+/+	+/+/+
b3416	malQ	M	+/+/+	+/+/-	+/+/+	+/+/+	+/+/+	+/+/+	-/+/+	+/+/-	+/+/+	+/+/+	-/+/+	+/+/-	+/+/+	+/+/+	+/+/+	+/+/+	+/+/+	+/+/+	+/+/+	+/+/+	+/+/+	-/+/+	+/+/+	+/+/+	+/+/+	+/+/+	+/+/+	+/+/+	+/+/+	+/+/+	+/-/-	+/+/+	+/-/-	-/+/+	-/+/-	+/+/+	+/+/+	-/+/-	+/+/+	+/+/+	+/-/-	+/+/+	+/+/+	+/+/+	-/+/-	+/+/+	+/+/+
b3418	malT	R	+/+/+	+/+/-	+/+/+	+/+/+	+/+/+	+/+/+	+/+/+	+/+/-	+/+/+	+/+/+	+/+/+	+/+/-	+/+/+	+/+/+	+/+/+	+/+/+	+/+/+	-/+/+	+/+/+	+/+/+	+/+/+	+/+/+	+/+/+	+/+/+	+/+/+	+/+/+	+/+/+	+/+/+	+/+/+	+/+/+	+/+/-	+/+/+	+/-/-	+/+/+	-/+/-	+/+/+	+/+/+	+/+/-	+/+/+	-/+/+	+/+/-	+/+/+	+/+/+	+/+/+	-/+/-	+/+/+	+/+/+
b3423	glpR	R	+/+/+	+/+/-	+/+/+	+/+/+	+/+/+	+/+/+	+/+/+	+/+/-	+/+/+	+/+/+	+/+/+	+/+/-	+/+/+	+/+/+	+/+/+	+/+/+	+/+/+	+/+/+	+/+/+	+/+/+	+/+/+	+/+/+	+/+/+	+/+/+	+/+/+	+/+/+	+/+/+	+/+/+	+/+/+	+/+/+	+/+/+	+/+/+	+/-/-	+/+/+	-/+/-	+/+/+	+/+/+	+/+/-	+/+/+	+/+/+	+/+/+	+/+/+	+/+/+	+/+/+	-/+/-	+/+/+	+/+/+
b3426	glpD	M	+/+/+	+/+/-	+/+/+	+/+/+	+/+/+	+/+/+	+/+/+	+/+/-	+/+/+	+/+/+	-/+/+	+/+/-	+/+/+	+/+/+	+/+/+	+/+/+	+/+/+	+/+/+	+/+/+	+/+/+	+/+/+	-/+/+	+/+/+	+/+/+	+/+/+	+/+/+	+/+/+	+/+/+	+/+/+	+/+/+	+/+/+	+/+/+	+/-/-	+/+/+	-/+/-	+/+/+	+/+/+	-/+/-	+/+/+	+/+/+	+/+/+	+/+/+	+/+/+	+/+/+	-/+/-	+/+/+	+/+/+
b3429	glgA	M	+/-/-	+/-/-	+/-/-	+/-/-	+/-/-	+/-/-	-/-/-	+/-/-	+/-/-	+/-/-	-/-/-	+/-/-	+/-/-	+/-/-	+/-/-	+/-/-	+/-/-	+/-/-	+/-/-	+/-/-	+/-/-	-/-/-	+/-/-	+/-/-	+/-/-	+/-/-	+/-/-	+/-/-	+/-/-	+/-/-	+/-/-	+/-/-	+/-/-	+/-/-	-/-/-	+/-/-	+/-/-	-/-/-	+/-/-	+/-/-	+/-/-	+/-/-	+/-/-	+/-/-	-/-/-	+/-/-	+/-/-
b3430	glgC	M	+/-/-	+/-/-	+/-/-	+/-/-	+/-/-	+/-/-	+/-/-	+/-/-	+/-/-	+/-/-	-/-/-	+/-/-	+/-/-	+/-/-	+/-/-	+/-/-	+/-/-	+/-/-	+/-/-	+/-/-	+/-/-	-/-/-	+/-/-	+/-/-	+/-/-	+/-/-	+/-/-	+/-/-	+/-/-	+/-/-	+/-/-	+/-/-	+/-/-	-/-/-	-/-/-	+/-/-	+/-/-	-/-/-	+/-/-	+/-/-	+/-/-	+/-/-	+/-/-	+/-/-	-/-/-	+/-/-	+/-/-
b3437	gntK	M	+/+/+	+/+/-	+/+/+	+/+/+	+/+/+	+/+/+	+/+/+	+/+/-	+/+/+	+/+/+	-/+/+	+/+/-	+/+/+	+/+/+	+/+/+	+/+/+	+/+/+	+/+/+	+/+/+	+/+/+	+/+/+	-/+/+	+/+/+	+/+/+	+/+/+	+/+/+	+/+/+	+/+/+	+/+/+	+/+/+	+/+/+	+/+/+	+/-/-	+/+/+	-/+/-	+/+/+	+/+/+	-/+/-	+/+/+	+/+/+	+/+/+	+/+/+	+/+/+	+/+/+	-/+/-	+/+/+	+/+/+
b3438	gntR	R	+/+/+	+/+/-	+/+/+	+/+/+	+/+/+	+/+/+	-/+/+	+/+/-	+/+/+	+/+/+	-/+/+	+/+/-	+/+/+	+/+/+	+/+/+	+/+/+	+/+/+	+/+/+	+/+/+	+/+/+	+/+/+	-/+/+	+/+/+	+/+/+	+/+/+	+/+/+	+/+/+	+/+/+	+/+/+	+/+/+	+/+/+	+/+/+	+/-/-	-/+/+	-/+/-	+/+/+	+/+/+	-/+/-	+/+/+	+/+/+	+/+/+	+/+/+	+/+/+	+/+/+	-/+/-	+/+/+	+/+/+
b3450	ugpC	M	+/+/+	+/+/-	+/+/+	+/+/+	+/+/+	+/+/+	+/+/+	+/+/-	+/+/+	+/+/+	-/+/+	+/+/-	+/+/+	+/+/+	+/+/+	+/+/+	+/+/+	+/+/+	+/+/+	+/+/+	+/+/+	-/+/+	+/+/+	+/+/+	+/+/+	+/+/+	+/+/+	+/+/+	+/+/+	+/+/+	+/+/+	+/+/+	+/-/-	-/+/+	-/+/-	+/+/+	+/+/+	+/+/-	+/+/+	+/+/+	+/+/+	+/+/+	+/+/+	+/+/+	-/+/-	+/+/+	+/+/+
b3451	ugpE	M	+/+/+	+/+/-	+/+/+	+/+/+	+/+/+	+/+/+	+/+/+	+/+/-	+/+/+	+/+/+	-/+/+	+/+/-	+/+/+	+/+/+	+/+/+	+/+/+	+/+/+	+/+/+	+/+/+	+/+/+	+/+/+	-/+/+	+/+/+	+/+/+	+/+/+	+/+/+	+/+/+	+/+/+	+/+/+	+/+/+	+/+/+	+/+/+	+/-/-	+/+/+	-/+/-	+/+/+	+/+/+	-/+/-	+/+/+	+/+/+	+/+/+	+/+/+	+/+/+	+/+/+	-/+/-	+/+/+	+/+/+
b3454	livF	M	+/+/+	+/+/-	+/+/+	+/+/+	+/+/+	+/+/+	+/+/+	+/+/-	+/+/+	+/+/+	-/+/+	+/+/-	+/+/+	+/+/+	+/+/+	+/+/+	+/+/+	+/+/+	+/+/+	+/+/+	+/+/+	-/+/+	+/+/+	+/+/+	+/+/+	+/+/+	+/+/+	+/+/+	+/+/+	+/+/+	+/+/+	+/+/+	+/-/-	+/+/+	-/+/-	+/+/+	+/+/+	-/+/-	+/+/+	+/+/+	+/+/+	+/+/+	+/+/+	+/+/+	-/+/-	+/+/+	+/+/+
b3456	livM	M	+/+/+	+/+/-	+/+/+	+/+/+	+/+/+	+/+/+	+/+/+	+/+/-	+/+/+	+/+/+	+/+/+	+/+/-	+/+/+	+/+/+	+/+/+	+/+/+	+/+/+	+/+/+	+/+/+	+/+/+	+/+/+	-/+/+	+/+/+	+/+/+	+/+/+	+/+/+	+/+/+	+/+/+	+/+/+	+/+/+	+/+/+	+/+/+	+/-/-	+/+/+	-/+/-	+/+/+	+/+/+	-/+/-	+/+/+	+/+/+	+/+/+	+/+/+	+/+/+	+/+/+	-/+/-	+/+/+	+/+/+
b3500	gor	M	+/+/+	+/+/-	+/+/+	+/+/+	+/+/+	+/+/+	+/+/+	+/+/-	+/+/+	+/+/+	-/+/+	+/+/-	+/+/+	+/+/+	+/+/+	+/+/+	+/+/+	+/+/+	+/+/+	+/+/+	+/+/+	-/+/+	+/+/+	+/+/+	+/+/+	+/+/+	+/+/+	+/+/+	+/+/+	+/+/+	+/+/+	+/+/+	+/-/-	+/+/+	-/+/-	+/+/+	+/+/+	-/+/-	+/+/+	+/+/+	+/+/+	+/+/+	+/+/+	+/+/+	-/+/-	+/+/+	+/+/+
b3517	gadA	M	+/+/+	+/+/-	+/+/+	+/+/+	+/+/+	+/+/+	+/+/+	+/+/-	+/+/+	+/+/+	-/+/+	+/+/-	+/+/+	+/+/+	+/+/+	+/+/+	+/+/+	+/+/+	+/+/+	+/+/+	+/+/+	-/+/+	+/+/+	+/+/+	+/+/+	+/+/+	+/+/+	+/+/+	+/+/+	+/+/+	+/+/+	+/+/+	+/-/-	+/+/+	-/+/-	+/+/+	+/+/+	-/+/-	+/+/+	+/+/+	+/+/+	+/+/+	+/+/+	+/+/+	-/+/-	+/+/+	+/+/+
b3519	treF	M	+/+/+	+/+/-	+/+/+	+/+/+	+/+/+	+/+/+	+/+/+	+/+/-	+/+/+	+/+/+	-/+/+	+/+/-	+/+/+	+/+/+	+/+/+	+/+/+	+/+/+	+/+/+	+/+/+	+/+/+	+/+/+	-/+/+	+/+/+	+/+/+	+/+/+	+/+/+	+/+/+	+/+/+	+/+/+	+/+/+	+/+/+	+/+/+	+/-/-	-/+/+	-/+/-	+/+/+	+/+/+	-/+/-	+/+/+	+/+/+	+/+/+	+/+/+	+/+/+	+/+/+	-/+/-	+/+/+	+/+/+
b3551	bisC	M	+/+/+	+/+/-	+/+/+	+/+/+	+/+/+	+/+/+	+/+/+	+/+/-	+/+/+	+/+/+	-/+/+	+/+/-	+/+/+	+/+/+	+/+/+	+/+/+	+/+/+	+/+/+	+/+/+	+/+/+	+/+/+	-/+/+	+/+/+	+/+/+	+/+/+	+/+/+	+/+/+	+/+/+	+/+/+	+/+/+	+/+/+	+/+/+	+/-/-	+/+/+	-/+/-	+/+/+	+/+/+	-/+/-	+/+/+	+/+/+	+/+/+	+/+/+	+/+/+	+/+/+	-/+/-	+/+/+	+/+/+
b3564	xylB	M	+/+/+	+/+/-	+/+/+	+/+/+	+/+/+	+/+/+	-/+/+	+/+/-	+/+/+	+/+/+	-/+/+	+/+/-	+/+/+	+/+/+	+/+/+	+/+/+	+/+/+	+/+/+	+/-/-	+/+/+	+/+/+	-/+/+	+/+/+	+/+/+	+/+/+	+/+/+	+/+/+	+/+/+	+/+/+	+/+/+	+/+/+	+/+/+	+/-/-	+/+/+	-/+/-	+/+/+	+/+/+	-/+/-	+/+/+	+/+/+	+/+/+	+/+/+	+/+/+	+/+/+	-/+/-	+/+/+	+/+/+
b3565	xylA	M	+/+/+	+/+/-	+/+/+	+/+/+	+/+/+	+/+/+	-/+/+	+/+/-	+/+/+	+/+/+	-/+/+	+/+/-	+/+/+	+/+/+	+/+/+	+/+/+	+/+/+	+/+/+	-/-/-	+/+/+	+/+/+	-/+/+	+/+/+	+/+/+	+/+/+	+/+/+	+/+/+	+/+/+	+/+/+	+/+/+	+/+/+	+/+/+	+/-/-	+/+/+	-/+/-	+/+/+	+/+/+	-/-/-	+/+/+	+/+/+	+/+/+	+/+/+	+/+/+	+/+/+	-/+/-	+/+/+	+/+/+
b3566	xylF	M	+/+/+	+/+/-	+/+/+	+/+/+	+/+/+	+/+/+	+/+/+	+/+/-	+/+/+	+/+/+	-/+/+	+/+/-	+/+/+	+/+/+	+/+/+	+/+/+	+/+/+	+/+/+	+/+/+	+/+/+	+/+/+	-/+/+	+/+/+	+/+/+	+/+/+	+/+/+	+/+/+	+/+/+	+/+/+	+/+/+	+/+/+	+/+/+	+/-/-	+/+/+	-/+/-	+/+/+	+/+/+	-/+/-	+/+/+	+/+/+	+/+/+	+/+/+	+/+/+	+/+/+	-/+/-	+/+/+	+/+/+
b3567	xylG	M	+/+/+	+/+/-	+/+/+	+/+/+	+/+/+	+/+/+	+/+/+	+/+/-	+/+/+	+/+/+	-/+/+	+/+/-	+/+/+	+/+/+	+/+/+	+/+/+	+/+/+	+/+/+	+/+/+	+/+/+	+/+/+	-/+/+	+/+/+	+/+/+	+/+/+	+/+/+	+/+/+	+/+/+	+/+/+	+/+/+	+/+/+	+/+/+	+/-/-	+/+/+	-/+/-	+/+/+	+/+/+	-/+/-	+/+/+	+/+/+	+/+/+	+/+/+	+/+/+	+/+/+	-/+/-	+/+/+	+/+/+
b3568	xylH	M	+/+/+	+/+/-	+/+/+	+/+/+	+/+/+	+/+/+	-/+/+	+/+/-	+/+/+	+/+/+	-/+/+	+/+/-	+/+/+	+/+/+	+/+/+	+/+/+	+/+/+	+/+/+	+/+/+	+/+/+	+/+/+	-/+/+	+/+/+	+/+/+	+/+/+	+/+/+	+/+/+	+/+/+	+/+/+	+/+/+	+/+/+	+/+/+	+/-/-	-/+/+	-/+/-	+/+/+	+/+/+	-/+/-	+/+/+	+/+/+	+/+/+	+/+/+	+/+/+	+/+/+	-/+/-	+/+/+	+/+/+
b3569	xylR	R	+/+/+	+/+/-	+/+/+	+/+/+	+/+/+	+/+/+	-/+/+	+/+/-	+/+/+	+/+/+	-/+/+	+/+/-	+/+/+	+/+/+	+/+/+	+/+/+	+/+/+	+/+/+	-/+/-	+/+/+	+/+/+	-/+/+	+/+/+	+/+/+	+/+/+	+/+/+	+/+/+	+/+/+	+/+/+	+/+/+	+/+/+	+/+/+	+/-/-	-/+/+	-/+/-	+/+/+	+/+/+	-/+/-	+/+/+	+/+/+	+/+/+	+/+/+	+/+/+	+/+/+	-/+/-	+/+/+	+/+/+
b3572	avtA	M	+/+/+	+/+/-	+/+/+	+/+/+	+/+/+	+/+/+	+/+/+	+/+/-	+/+/+	+/+/+	-/+/+	+/+/-	+/+/+	+/+/+	+/+/+	+/+/+	+/+/+	+/+/+	+/+/+	+/+/+	+/+/+	-/+/+	+/+/+	+/+/+	+/+/+	+/+/+	+/+/+	+/+/+	+/+/+	+/+/+	+/+/+	+/+/+	+/-/-	-/+/+	-/+/-	+/+/+	+/+/+	+/+/-	+/+/+	+/+/+	+/+/+	+/+/+	+/+/+	+/+/+	-/+/-	+/+/+	+/+/+
b3588	aldB	M	+/+/+	+/+/-	+/+/+	+/+/+	+/+/+	+/+/+	-/+/+	+/+/-	+/+/+	+/+/+	-/+/+	+/+/-	+/+/+	+/+/+	+/+/+	+/+/+	+/+/+	+/+/+	+/+/+	+/+/+	+/+/+	-/+/+	+/+/+	+/+/+	+/+/+	+/+/+	+/+/+	+/+/+	+/+/+	+/+/+	+/+/+	+/+/+	+/-/-	+/+/+	-/+/-	+/+/+	+/+/+	-/+/-	+/+/+	-/+/+	+/+/+	+/+/+	+/+/+	+/+/+	+/+/-	+/+/+	+/+/+
b3600	mtlD	M	+/+/+	+/+/-	+/+/+	+/+/+	+/+/+	+/+/+	-/+/+	+/+/-	+/+/+	+/+/+	-/+/+	+/+/-	-/+/+	+/+/+	+/+/+	+/+/+	+/+/+	+/+/+	+/+/+	+/+/+	-/-/-	-/+/+	+/+/+	+/+/+	+/+/+	+/+/+	+/+/+	+/+/+	+/+/+	+/+/+	+/+/+	+/+/+	+/-/-	+/+/+	-/+/-	+/+/+	+/+/+	-/+/-	+/+/+	+/+/+	+/+/+	+/+/+	+/+/+	+/+/+	-/+/-	+/+/+	+/+/+
b3603	lldP	M	+/+/+	+/+/-	+/+/+	+/+/+	+/+/+	+/+/+	-/+/+	+/+/-	+/+/+	+/+/+	-/+/+	+/+/-	+/+/+	+/+/+	+/+/+	+/+/+	+/+/+	+/+/+	+/+/+	+/+/+	+/+/+	-/+/+	+/+/+	+/+/+	+/+/+	+/+/+	+/+/+	+/+/+	+/+/+	+/+/+	+/+/+	+/+/+	+/-/-	+/+/+	-/+/-	+/+/+	+/+/+	-/+/-	+/+/+	+/+/+	+/+/+	+/+/+	+/+/+	+/+/+	-/+/-	+/+/+	+/+/+
b3605	lldD	M	+/+/+	+/+/-	+/+/+	+/+/+	+/+/+	+/+/+	-/+/+	+/+/-	+/+/+	+/+/+	-/+/+	+/+/-	+/+/+	+/+/+	+/+/+	+/+/+	+/+/+	+/+/+	+/+/+	+/-/-	+/+/+	-/+/+	+/+/+	+/+/+	+/+/+	+/+/+	+/+/+	+/+/+	+/+/+	+/+/+	+/+/+	+/+/+	+/-/-	+/+/+	-/-/-	+/+/+	+/+/+	-/+/-	+/+/+	+/+/+	+/+/+	+/+/+	+/+/+	+/+/+	-/+/-	+/+/+	+/+/+
b3653	gltS	M	+/+/+	+/+/-	+/+/+	+/+/+	+/+/+	+/+/+	-/+/+	+/+/-	+/+/+	+/+/+	-/+/+	+/+/-	+/+/+	+/+/+	+/+/+	+/+/+	+/+/+	+/+/+	+/+/+	+/+/+	+/+/+	-/+/+	+/+/+	+/+/+	+/+/+	+/+/+	+/+/+	+/+/+	+/+/+	+/+/+	+/+/+	+/+/+	+/-/-	+/+/+	-/+/-	+/+/+	+/+/+	-/+/-	+/+/+	+/+/+	+/+/+	+/+/+	+/+/+	+/+/+	-/+/-	+/+/+	+/+/+
b3668	uhpB	R	+/+/+	+/+/-	+/+/+	+/+/+	+/+/+	+/+/+	-/+/+	+/+/-	+/+/+	+/+/+	-/+/+	+/+/-	+/+/+	+/+/+	+/+/+	+/+/+	+/+/+	+/+/+	+/+/+	+/+/+	+/+/+	-/+/+	+/+/+	+/+/+	+/+/+	+/+/+	+/+/+	+/+/+	+/+/+	+/+/+	+/+/+	+/+/+	+/-/-	+/+/+	-/+/-	+/+/+	+/+/+	-/+/-	+/+/+	+/+/+	+/+/+	+/+/+	+/+/+	+/+/+	-/+/-	+/+/+	+/+/+
b3671	ilvB	M	+/+/+	+/+/-	+/+/+	+/+/+	+/+/+	+/+/+	-/+/+	+/+/-	+/+/+	+/+/+	-/+/+	+/+/-	+/+/+	+/+/+	+/+/+	+/+/+	+/+/+	+/+/+	+/+/+	+/+/+	+/+/+	-/+/+	+/+/+	+/+/+	+/+/+	+/+/+	+/+/+	+/+/+	+/+/+	+/+/+	+/+/+	+/+/+	+/-/-	+/+/+	-/+/-	+/+/+	+/+/+	-/+/-	+/+/+	+/+/+	+/+/+	+/+/+	+/+/+	+/+/+	-/+/-	+/+/+	+/+/+
b3725	pstB	M	+/+/+	+/+/-	+/+/+	+/+/+	+/+/+	+/+/+	+/+/+	+/+/-	+/+/+	+/+/+	-/+/+	+/+/-	+/+/+	+/+/+	+/+/+	+/+/+	+/+/+	+/+/+	+/+/+	+/+/+	+/+/+	-/+/+	+/+/+	+/+/+	+/+/+	+/+/+	+/+/+	+/+/+	+/+/+	+/+/+	+/+/+	+/+/+	+/-/-	-/+/+	-/+/-	+/+/+	+/+/+	-/+/-	+/+/+	+/+/+	+/+/+	+/+/+	+/+/+	+/+/+	-/+/-	+/+/+	+/+/+
b3731	atpC	M	+/+/+	+/+/-	+/+/+	+/+/+	+/+/+	+/+/+	+/+/+	+/+/-	+/+/+	+/+/+	-/+/+	+/+/-	+/+/+	+/+/+	+/+/+	+/+/+	+/+/+	+/+/+	+/+/+	+/+/+	+/+/+	-/+/+	+/+/+	+/+/+	+/+/+	+/+/+	+/+/+	+/+/+	-/-/-	+/+/+	+/+/+	+/+/+	+/-/-	-/+/+	-/+/-	+/+/+	+/+/+	-/+/-	+/+/+	-/+/+	+/+/+	+/+/+	+/+/+	-/+/+	-/+/-	+/+/+	+/+/+
b3743	asnC	R	+/+/+	+/+/-	+/+/+	+/+/+	+/+/+	+/+/+	-/+/+	+/+/-	+/+/+	+/+/+	-/+/+	+/+/-	+/+/+	+/+/+	+/+/+	+/+/+	+/+/+	+/+/+	+/+/+	+/+/+	+/+/+	-/+/+	+/+/+	+/+/+	+/+/+	+/+/+	+/+/+	+/+/+	+/+/+	+/+/+	+/+/+	+/+/+	+/-/-	+/+/+	-/+/-	+/+/+	+/+/+	-/+/-	+/+/+	+/+/+	+/+/+	+/+/+	+/+/+	+/+/+	-/+/-	+/+/+	+/+/+
b3750	rbsC	M	+/+/+	+/+/-	+/+/+	+/+/+	+/+/+	+/+/+	+/+/+	+/+/-	+/+/+	+/+/+	-/+/+	+/+/-	+/+/+	+/+/+	+/+/+	+/+/+	+/+/+	+/+/+	+/+/+	+/+/+	+/+/+	-/+/+	+/+/+	+/+/+	+/+/+	+/+/+	+/+/+	+/+/+	+/+/+	+/+/+	+/+/+	+/+/+	+/-/-	+/+/+	-/+/-	+/+/+	+/+/+	-/+/-	+/+/+	+/+/+	+/+/+	+/+/+	+/+/+	+/+/+	-/+/-	+/+/+	+/+/+
b3751	rbsB	M	+/+/+	+/+/-	+/+/+	+/+/+	+/+/+	+/+/+	-/+/+	+/+/-	+/+/+	+/+/+	-/+/+	+/+/-	+/+/+	+/+/+	+/+/+	+/+/+	+/+/+	+/+/+	+/+/+	+/+/+	+/+/+	-/+/+	+/+/+	+/+/+	+/+/+	+/+/+	+/+/+	+/+/+	+/+/+	+/+/+	+/+/+	+/+/+	+/-/-	+/+/+	-/+/-	+/+/+	+/+/+	-/+/-	+/+/+	+/+/+	+/+/+	+/+/+	+/+/+	+/+/+	-/+/-	+/+/+	+/+/+
b3753	rbsR	R	+/+/+	+/+/-	+/+/+	+/+/+	+/+/+	+/+/+	+/+/+	+/+/-	+/+/+	+/+/+	-/+/+	+/+/-	+/+/+	+/+/+	+/+/+	+/+/+	+/+/+	+/+/+	+/+/+	+/+/+	+/+/+	-/+/+	+/+/+	+/+/+	+/+/+	+/+/+	+/+/+	+/+/+	+/+/+	+/+/+	+/+/+	+/+/+	+/-/-	+/+/+	-/+/-	+/+/+	+/+/+	-/+/-	+/+/+	+/+/+	+/+/+	+/+/+	+/+/+	+/+/+	-/+/-	+/+/+	+/+/+
b3771	ilvD	M	+/-/-	+/-/-	+/-/-	+/-/-	+/-/-	+/-/-	-/-/-	+/-/-	+/-/-	+/-/-	-/-/-	+/-/-	+/-/-	+/-/-	+/-/-	+/-/-	+/-/-	+/-/-	+/-/-	+/-/-	+/-/-	-/-/-	+/-/-	+/-/-	+/-/-	+/-/-	+/-/-	+/-/-	+/-/-	+/-/-	+/-/-	+/-/-	+/-/-	+/-/-	-/-/-	+/-/-	+/-/-	-/-/-	+/-/-	+/-/-	+/-/-	+/-/-	+/-/-	+/-/-	-/-/-	+/-/-	+/-/-
b3773	ilvY	R	+/+/-	+/+/-	+/+/-	+/+/-	+/+/-	+/+/-	-/+/-	+/+/-	+/+/-	+/+/-	-/+/-	+/+/-	+/+/-	+/+/-	+/+/-	+/+/-	+/+/-	+/+/-	+/+/-	+/+/-	+/+/-	-/+/-	+/+/-	+/+/-	+/+/-	+/+/-	+/+/-	+/+/-	+/+/-	+/+/-	+/+/-	+/+/-	+/-/-	-/+/-	-/+/-	+/+/-	+/+/-	-/+/-	+/+/-	+/+/-	+/+/-	+/+/-	+/+/-	+/+/-	-/+/-	+/+/-	+/+/-
b3787	rffD	M	+/+/+	+/+/-	+/+/+	+/+/+	+/+/+	+/+/+	-/+/+	+/+/-	+/+/+	+/+/+	-/+/+	+/+/-	+/+/+	+/+/+	+/+/+	+/+/+	+/+/+	+/+/+	+/+/+	+/+/+	+/+/+	-/+/+	+/+/+	+/+/+	+/+/+	+/+/+	+/+/+	+/+/+	+/+/+	+/+/+	+/+/+	+/+/+	+/-/-	-/+/+	-/+/-	+/+/+	+/+/+	-/+/-	+/+/+	+/+/+	+/+/+	+/+/+	+/+/+	+/+/+	-/+/-	+/+/+	+/+/+
b3789	rffH	M	+/+/+	+/+/-	+/+/+	+/+/+	+/+/+	+/+/+	+/+/+	+/+/-	+/+/+	+/+/+	-/+/+	+/+/-	+/+/+	+/+/+	+/+/+	+/+/+	+/+/+	+/+/+	+/+/+	+/+/+	+/+/+	-/+/+	+/+/+	+/+/+	+/+/+	+/+/+	+/+/+	+/+/+	+/+/+	+/+/+	+/+/+	+/+/+	+/-/-	-/+/+	-/+/-	+/+/+	+/+/+	-/+/-	+/+/+	+/+/+	+/+/+	+/+/+	+/+/+	+/+/+	-/+/-	+/+/+	+/+/+
b3806	cyaA	M	+/+/+	+/+/-	+/+/+	+/+/+	+/+/+	-/+/+	-/+/+	+/+/-	+/+/+	+/+/+	-/+/+	+/+/-	+/+/+	+/+/+	+/+/+	+/+/+	+/+/+	+/+/+	+/+/+	+/+/+	+/+/+	-/+/+	+/+/+	+/+/+	+/+/+	+/+/+	+/+/+	+/+/+	+/+/+	+/+/+	+/+/+	+/+/+	+/-/-	-/+/+	-/+/-	+/+/+	+/+/+	-/+/-	+/+/+	+/+/+	+/+/+	+/+/+	+/+/+	+/+/+	-/+/-	+/+/+	+/+/+
b3821	pldA	M	+/+/+	+/+/-	+/+/+	+/+/+	+/+/+	+/+/+	-/+/+	+/+/-	+/+/+	+/+/+	-/+/+	+/+/-	+/+/+	+/+/+	+/+/+	+/+/+	+/+/+	+/+/+	+/+/+	+/+/+	+/+/+	-/+/+	+/+/+	+/+/+	+/+/+	+/+/+	+/+/+	+/+/+	+/+/+	+/+/+	+/+/+	+/+/+	+/-/-	-/+/+	-/+/-	+/+/+	+/+/+	-/+/-	+/+/+	+/+/+	+/+/+	+/+/+	+/+/+	+/+/+	-/+/-	+/+/+	+/+/+
b3829	metE	M	+/+/+	+/+/-	+/+/+	+/+/+	+/+/+	+/+/+	-/+/+	+/+/-	+/+/+	+/+/+	-/+/+	+/+/-	+/+/+	+/+/+	+/+/+	+/+/+	+/+/+	+/+/+	+/+/+	+/+/+	+/+/+	-/+/+	+/+/+	+/+/+	+/+/+	-/+/+	+/+/+	+/+/+	+/+/+	+/+/+	+/+/+	+/+/+	+/-/-	-/+/+	-/+/-	+/+/+	+/+/+	-/+/-	+/+/+	-/+/+	+/+/+	+/+/+	+/+/+	+/+/+	-/+/-	+/+/+	+/+/+
b3831	udp	M	+/+/+	+/+/-	+/+/+	+/+/+	+/+/+	+/+/+	+/+/+	+/+/-	+/+/+	+/+/+	-/+/+	+/+/-	+/+/+	+/+/+	+/+/+	+/+/+	+/+/+	+/+/+	+/+/+	+/+/+	+/+/+	-/+/+	+/+/+	+/+/+	+/+/+	+/+/+	+/+/+	+/+/+	+/+/+	+/+/+	+/+/+	+/+/+	+/-/-	-/+/+	-/+/-	+/+/+	+/+/+	-/+/-	-/+/-	+/+/+	+/+/+	+/+/+	+/+/+	+/+/+	+/+/-	+/+/+	+/+/+
b3849	trkH	M	+/+/+	+/+/-	+/+/+	+/+/+	+/+/+	+/+/+	-/+/+	+/+/-	+/+/+	+/+/+	-/+/+	+/+/-	+/+/+	+/+/+	+/+/+	+/+/+	+/+/+	+/+/+	+/+/+	+/+/+	+/+/+	-/+/+	+/+/+	+/+/+	+/+/+	+/+/+	+/+/+	+/+/+	+/+/+	+/+/+	+/+/+	+/+/+	+/-/-	-/+/+	-/+/-	+/+/+	+/+/+	-/+/-	+/+/+	-/+/+	+/+/+	+/+/+	+/+/+	+/+/+	-/+/-	+/+/+	+/+/+
b3868	glnG	R	+/+/+	+/+/-	+/+/+	+/+/+	+/+/+	+/+/+	+/+/+	+/+/-	+/+/+	+/+/+	-/+/+	+/+/-	+/+/+	+/+/+	+/+/+	+/+/+	+/+/+	+/+/+	+/+/+	+/+/+	+/+/+	-/+/+	+/+/+	+/+/+	+/+/+	+/+/+	+/+/+	+/+/+	+/+/+	+/+/+	+/+/+	+/+/+	+/-/-	+/+/+	-/+/-	+/+/+	+/+/+	-/+/-	+/+/+	+/+/+	+/+/+	+/+/+	+/+/+	+/+/+	-/+/-	+/+/+	+/+/+
b3869	glnL	R	+/+/+	+/+/-	+/+/+	+/+/+	+/+/+	+/+/+	-/+/+	+/+/-	+/+/+	+/+/+	-/+/+	+/+/-	+/+/+	+/+/+	+/+/+	+/+/+	+/+/+	+/+/+	+/+/+	+/+/+	+/+/+	-/+/+	+/+/+	+/+/+	+/+/+	+/+/+	+/+/+	+/+/+	+/+/+	+/+/+	+/+/+	+/+/+	+/-/-	+/+/+	-/+/-	+/+/+	+/+/+	-/+/-	+/+/+	+/+/+	+/+/+	+/+/+	+/+/+	+/+/+	-/+/-	+/+/+	+/+/+
b3870	glnA	M	+/+/+	+/+/-	+/+/+	+/+/+	+/+/+	+/+/+	+/+/+	+/+/-	+/+/+	+/+/+	-/+/+	+/+/-	+/+/+	+/+/+	+/+/+	+/+/+	+/+/+	+/+/+	+/+/+	+/+/+	+/+/+	-/+/+	+/+/+	+/+/+	+/+/+	+/+/+	+/+/+	+/+/+	+/+/+	+/+/+	+/+/+	+/+/+	+/-/-	+/+/+	-/+/-	+/+/+	+/+/+	-/+/-	+/+/+	+/+/+	+/+/+	+/+/+	+/+/+	+/+/+	+/+/-	+/+/+	+/+/+
b3892	fdoI	M	+/+/+	+/+/-	+/+/+	+/+/+	+/+/+	+/+/+	+/+/+	+/+/-	+/+/+	+/+/+	-/+/+	+/+/-	+/+/+	+/+/+	+/+/+	+/+/+	+/+/+	+/+/+	+/+/+	+/+/+	+/+/+	-/+/+	+/+/+	+/+/+	+/+/+	+/+/+	+/+/+	+/+/+	+/+/+	+/+/+	+/+/+	+/+/+	+/-/-	+/+/+	-/+/-	+/+/+	+/+/+	-/+/-	+/+/+	+/+/+	+/+/+	+/+/+	+/+/+	+/+/+	+/+/-	+/+/+	+/+/+
b3893	fdoH	M	+/+/+	+/+/-	+/+/+	+/+/+	+/+/+	+/+/+	-/+/+	+/+/-	+/+/+	+/+/+	-/+/+	+/+/-	+/+/+	+/+/+	+/+/+	+/+/+	+/+/+	+/+/+	+/+/+	+/+/+	+/+/+	-/+/+	+/+/+	+/+/+	+/+/+	+/+/+	+/+/+	+/+/+	+/+/+	+/+/+	+/+/+	+/+/+	+/-/-	+/+/+	-/+/-	+/+/+	+/+/+	-/+/-	+/+/+	+/+/+	+/+/+	+/+/+	+/+/+	+/+/+	-/+/-	+/+/+	+/+/+
b3894	fdoG	M	+/+/+	+/+/-	+/+/+	+/+/+	+/+/+	+/+/+	-/+/+	+/+/-	+/+/+	+/+/+	-/+/+	+/+/-	+/+/+	+/+/+	+/+/+	+/+/+	+/+/+	+/+/+	+/+/+	+/+/+	+/+/+	-/+/+	+/+/+	+/+/+	+/+/+	+/+/+	+/+/+	+/+/+	+/+/+	+/+/+	+/+/+	+/+/+	+/-/-	-/+/+	-/+/-	+/+/+	+/+/+	-/+/-	+/+/+	+/+/+	+/+/+	+/+/+	+/+/+	+/+/+	-/+/-	+/+/+	+/+/+
b3902	rhaD	M	+/+/+	+/+/-	+/+/+	+/+/+	+/+/+	+/+/+	+/+/+	+/+/-	+/+/+	+/+/+	-/+/+	+/+/-	+/+/+	+/+/+	+/+/+	+/+/+	+/+/+	+/+/+	+/+/+	+/+/+	+/+/+	-/+/+	+/+/+	+/+/+	+/+/+	+/+/+	+/-/-	+/+/+	+/+/+	+/+/+	+/+/+	+/+/+	+/-/-	+/+/+	-/+/-	+/+/+	+/+/+	-/+/-	+/+/+	+/+/+	+/+/+	+/+/+	+/+/+	+/+/+	+/+/-	+/+/+	+/+/+
b3903	rhaA	M	+/+/+	+/+/-	+/+/+	+/+/+	+/+/+	+/+/+	+/+/+	+/+/-	+/+/+	+/+/+	-/+/+	+/+/-	+/+/+	+/+/+	+/+/+	+/+/+	+/+/+	+/+/+	+/+/+	+/+/+	+/+/+	-/+/+	+/+/+	+/+/+	+/+/+	+/+/+	-/-/-	+/+/+	+/+/+	+/+/+	+/+/+	+/+/+	+/-/-	+/+/+	-/+/-	+/+/+	+/+/+	-/+/-	+/+/+	+/+/+	+/+/+	+/+/+	+/+/+	+/+/+	-/+/-	+/+/+	+/+/+
b3904	rhaB	M	+/+/+	+/+/-	+/+/+	+/+/+	+/+/+	+/+/+	+/+/+	+/+/-	+/+/+	+/+/+	-/+/+	+/+/-	+/+/+	+/+/+	+/+/+	+/+/+	+/+/+	+/+/+	+/+/+	+/+/+	+/+/+	-/+/+	+/+/+	+/+/+	+/+/+	+/+/+	+/-/-	+/+/+	+/+/+	+/+/+	+/+/+	+/+/+	+/-/-	+/+/+	-/+/-	+/+/+	+/+/+	-/+/-	+/+/+	+/+/+	+/+/+	+/+/+	+/+/+	+/+/+	-/+/-	+/+/+	+/+/+
b3905	rhaS	R	+/+/+	+/+/-	+/+/+	+/+/+	+/+/+	+/+/+	+/+/+	+/+/-	+/+/+	+/+/+	-/+/+	+/+/-	+/+/+	+/+/+	+/+/+	+/+/+	+/+/+	+/+/+	+/+/+	+/+/+	+/+/+	-/+/+	+/+/+	+/+/+	+/+/+	+/+/+	-/+/-	+/+/+	+/+/+	+/+/+	+/+/+	+/+/+	+/-/-	+/+/+	-/+/-	+/+/+	+/+/+	-/+/-	+/+/+	+/+/+	+/+/+	+/+/+	+/+/+	+/+/+	-/+/-	+/+/+	+/+/+
b3906	rhaR	R	+/+/+	+/+/-	+/+/+	+/+/+	+/+/+	+/+/+	+/+/+	+/+/-	+/+/+	+/+/+	-/+/+	+/+/-	+/+/+	+/+/+	+/+/+	+/+/+	+/+/+	+/+/+	+/+/+	+/+/+	+/+/+	-/+/+	+/+/+	+/+/+	+/+/+	+/+/+	-/+/-	+/+/+	+/+/+	+/+/+	+/+/+	+/+/+	+/-/-	+/+/+	-/+/-	+/+/+	+/+/+	-/+/-	+/+/+	+/+/+	+/+/+	+/+/+	+/+/+	+/+/+	-/+/-	+/+/+	+/+/+
b3908	sodA	M	+/+/+	+/+/-	+/+/+	+/+/+	+/+/+	+/+/+	+/+/+	+/+/-	+/+/+	+/+/+	-/+/+	+/+/-	+/+/+	+/+/+	+/+/+	+/+/+	+/+/+	+/+/+	+/+/+	+/+/+	+/+/+	-/+/+	+/+/+	+/+/+	+/+/+	+/+/+	+/+/+	+/+/+	+/+/+	+/+/+	+/+/+	+/+/+	+/-/-	-/+/+	-/+/-	+/+/+	+/+/+	-/+/-	+/+/+	+/+/+	+/+/+	+/+/+	+/+/+	+/+/+	-/+/-	+/+/+	+/+/+
b3909	kdgT	M	+/+/+	+/+/-	+/+/+	+/+/+	+/+/+	+/+/+	+/+/+	+/+/-	+/+/+	+/+/+	-/+/+	+/+/-	+/+/+	+/+/+	+/+/+	+/+/+	+/+/+	+/+/+	+/+/+	+/+/+	+/+/+	-/+/+	+/+/+	+/+/+	+/+/+	+/+/+	+/+/+	+/+/+	+/+/+	+/+/+	+/+/+	+/+/+	+/-/-	+/+/+	-/+/-	+/+/+	+/+/+	-/+/-	+/+/+	+/+/+	+/+/+	+/+/+	+/+/+	+/+/+	-/+/-	+/+/+	+/+/+
b3912	cpxR	R	+/+/+	+/+/-	+/+/+	+/+/+	+/+/+	+/+/+	+/+/+	+/+/-	+/+/+	+/+/+	-/+/+	+/+/-	+/+/+	+/+/+	+/+/+	+/+/+	+/+/+	+/+/+	+/+/+	+/+/+	+/+/+	-/+/+	+/+/+	+/+/+	+/+/+	+/+/+	+/+/+	+/+/+	+/+/+	+/+/+	+/+/+	+/+/+	+/-/-	-/+/+	-/+/-	+/+/+	+/+/+	-/+/-	+/+/+	+/+/+	+/+/+	+/+/+	+/+/+	+/+/+	-/+/-	+/+/+	+/+/+
b3916	pfkA	M	+/+/+	+/+/-	+/+/+	+/+/+	+/+/+	+/+/+	+/+/+	+/+/-	+/+/+	+/+/+	-/+/+	+/+/-	+/+/+	+/+/+	+/+/+	+/+/+	+/+/+	+/+/+	+/+/+	+/+/+	+/+/+	-/+/+	+/+/+	+/+/+	+/+/+	+/+/+	+/+/+	+/+/+	+/+/+	+/+/+	+/+/+	+/+/+	+/-/-	+/+/+	-/+/-	+/+/+	+/+/+	-/+/-	+/+/+	-/+/+	+/+/+	+/+/+	+/+/+	+/+/+	+/+/-	+/+/+	+/+/+
b3917	sbp	M	+/+/+	+/+/-	+/+/+	+/+/+	+/+/+	+/+/+	+/+/+	+/+/-	+/+/+	+/+/+	-/+/+	+/+/-	+/+/+	+/+/+	+/+/+	+/+/+	+/+/+	+/+/+	+/+/+	+/+/+	+/+/+	-/+/+	+/+/+	+/+/+	+/+/+	+/+/+	+/+/+	+/+/+	+/+/+	+/+/+	+/+/+	+/+/+	+/-/-	-/+/+	-/+/-	+/+/+	+/+/+	-/+/-	+/+/+	+/+/+	+/+/+	+/+/+	+/+/+	+/+/+	-/+/-	+/+/+	+/+/+
b3919	tpiA	M	+/+/+	+/+/-	+/-/-	+/-/-	+/+/+	+/-/-	-/-/-	+/-/-	+/+/+	+/+/+	-/+/+	+/-/-	+/+/+	+/+/+	+/+/+	+/-/-	+/+/+	+/+/+	+/+/+	+/-/-	+/+/+	-/-/-	+/+/+	+/-/-	+/-/-	+/+/+	+/+/+	+/+/+	+/-/-	+/+/+	+/+/+	+/+/+	+/-/-	-/-/-	-/-/-	+/-/-	+/+/+	-/+/-	+/+/+	+/-/-	+/+/+	+/-/-	+/+/+	+/-/-	-/-/-	+/-/-	+/-/-
b3926	glpK	M	+/+/+	+/+/-	+/+/+	+/+/+	+/+/+	+/+/+	+/+/+	+/+/-	+/+/+	+/+/+	-/+/+	+/+/-	+/+/+	+/+/+	+/+/+	+/+/+	+/+/+	+/+/+	+/+/+	+/+/+	+/+/+	-/+/+	+/+/+	+/+/+	+/+/+	+/+/+	+/+/+	+/+/+	+/+/+	+/+/+	+/+/+	+/+/+	+/-/-	+/+/+	-/+/-	+/+/+	+/+/+	-/+/-	+/+/+	+/+/+	+/+/+	+/+/+	+/+/+	+/+/+	-/+/-	+/+/+	+/+/+
b3927	glpF	M	+/+/+	+/+/-	+/+/+	+/+/+	+/+/+	+/+/+	+/+/+	+/+/-	+/+/+	+/+/+	-/+/+	+/+/-	+/+/+	+/-/-	+/+/+	+/+/+	+/+/+	+/+/+	+/+/+	+/+/+	+/+/+	-/+/+	+/+/+	+/+/+	+/+/+	+/+/+	+/+/+	+/+/+	+/+/+	+/+/+	+/+/+	+/+/+	+/-/-	+/+/+	-/+/-	+/+/+	+/+/+	-/+/-	+/+/+	+/+/+	+/+/+	+/+/+	+/+/+	+/+/+	-/+/-	+/+/+	+/+/+
b3929	rraA	M	+/+/+	+/+/-	+/+/+	+/+/+	+/+/+	+/+/+	+/+/+	+/+/-	+/+/+	+/+/+	-/+/+	+/+/-	+/+/+	+/+/+	+/+/+	+/+/+	+/+/+	+/+/+	+/+/+	+/+/+	+/+/+	-/+/+	+/+/+	+/+/+	+/+/+	+/+/+	+/+/+	+/+/+	+/+/+	+/+/+	+/+/+	+/+/+	+/-/-	+/+/+	-/+/-	+/+/+	+/+/+	-/+/-	+/+/+	+/+/+	+/+/+	+/+/+	+/+/+	+/+/+	-/+/-	+/+/+	+/+/+
b3930	menA	M	+/+/+	+/+/-	+/+/+	+/+/+	+/+/+	+/+/+	+/+/+	+/+/-	+/+/+	+/+/+	-/+/+	+/+/-	+/+/+	+/+/+	+/+/+	+/+/+	+/+/+	+/+/+	+/+/+	+/+/+	+/+/+	-/+/+	+/+/+	+/+/+	+/+/+	+/+/+	+/+/+	+/+/+	+/+/+	+/+/+	+/+/+	+/+/+	+/-/-	-/+/+	-/+/-	+/+/+	+/+/+	-/+/-	+/+/+	+/+/+	+/+/+	+/+/+	+/+/+	+/+/+	-/+/-	+/+/+	+/+/+
b3934	cytR	R	+/+/+	+/+/-	+/+/+	+/+/+	+/+/+	+/+/+	+/+/+	+/+/-	+/+/+	+/+/+	-/+/+	+/+/-	+/+/+	+/+/+	+/+/+	+/+/+	+/+/+	+/+/+	+/+/+	+/+/+	+/+/+	-/+/+	+/+/+	+/+/+	+/+/+	+/+/+	+/+/+	+/+/+	+/+/+	+/+/+	+/+/+	+/+/+	+/-/-	-/+/+	-/+/-	+/+/+	+/+/+	-/+/-	+/+/+	+/+/+	+/+/+	+/+/+	+/+/+	+/+/+	-/+/-	+/+/+	+/+/+
b3942	katG	M	+/+/+	+/+/-	+/+/+	+/+/+	+/+/+	+/+/+	+/+/+	+/+/-	+/+/+	+/+/+	-/+/+	+/+/-	+/+/+	+/+/+	+/+/+	+/+/+	+/+/+	+/+/+	+/+/+	+/+/+	+/+/+	-/+/+	+/+/+	+/+/+	+/+/+	+/+/+	+/+/+	+/+/+	+/+/+	+/+/+	+/+/+	+/+/+	+/-/-	+/+/+	-/+/-	+/+/+	+/+/+	-/+/-	+/+/+	+/+/+	+/+/+	+/+/+	+/+/+	+/+/+	-/+/-	+/+/+	+/+/+
b3945	gldA	M	+/+/+	+/+/-	+/+/+	+/+/+	+/+/+	+/+/+	+/+/+	+/+/-	+/+/+	+/+/+	-/+/+	+/+/-	+/+/+	+/+/+	+/+/+	+/+/+	+/+/+	+/+/+	+/+/+	+/+/+	+/+/+	-/+/+	+/+/+	+/+/+	+/+/+	+/+/+	+/+/+	+/+/+	+/+/+	+/+/+	+/+/+	+/+/+	+/-/-	+/+/+	-/+/-	+/+/+	+/+/+	-/+/-	+/+/+	+/+/+	+/+/+	+/+/+	+/+/+	+/+/+	-/+/-	+/+/+	+/+/+
b3946	fsaB	M	+/+/+	+/+/-	+/+/+	+/+/+	+/+/+	+/+/+	+/+/+	+/+/-	+/+/+	+/+/+	-/+/+	+/+/-	+/+/+	+/+/+	+/+/+	+/+/+	+/+/+	+/+/+	+/+/+	+/+/+	+/+/+	-/+/+	+/+/+	+/+/+	+/+/+	+/+/+	+/+/+	+/+/+	+/+/+	+/+/+	+/+/+	+/+/+	+/-/-	+/+/+	-/+/-	+/+/+	+/+/+	-/+/-	+/+/+	+/+/+	+/+/+	+/+/+	+/+/+	+/+/+	-/+/-	+/+/+	+/+/+
b3952	pflC	M	+/+/+	+/+/-	+/+/+	+/+/+	+/+/+	+/+/+	+/+/+	+/+/-	+/+/+	+/+/+	-/+/+	+/+/-	+/+/+	+/+/+	+/+/+	+/+/+	+/+/+	+/+/+	+/+/+	+/+/+	+/+/+	-/+/+	+/+/+	+/+/+	+/+/+	+/+/+	+/+/+	+/+/+	+/+/+	+/+/+	+/+/+	+/+/+	+/-/-	+/+/+	-/+/-	+/+/+	+/+/+	-/+/-	+/+/+	+/+/+	+/+/+	+/+/+	+/+/+	+/+/+	-/+/-	+/+/+	+/+/+
b3957	argE	M	+/-/-	+/-/-	+/-/-	+/-/-	+/-/-	+/-/-	-/-/-	+/-/-	+/-/-	+/-/-	-/-/-	+/-/-	+/-/-	+/-/-	+/-/-	+/-/-	+/-/-	+/-/-	+/-/-	+/-/-	+/-/-	-/-/-	+/-/-	+/-/-	+/-/-	+/-/-	+/-/-	+/-/-	+/-/-	+/-/-	+/-/-	+/-/-	+/-/-	+/-/-	-/-/-	+/-/-	+/-/-	-/-/-	+/-/-	-/-/-	+/-/-	+/-/-	+/-/-	-/-/-	-/-/-	+/-/-	+/-/-
b3958	argC	M	+/-/-	+/-/-	+/-/-	+/-/-	+/-/-	+/-/-	-/-/-	+/-/-	+/-/-	+/-/-	-/-/-	+/-/-	+/-/-	+/-/-	+/-/-	+/-/-	+/-/-	+/-/-	+/-/-	+/-/-	+/-/-	-/-/-	+/-/-	+/-/-	+/-/-	+/-/-	+/-/-	+/-/-	+/-/-	+/-/-	+/-/-	+/-/-	+/-/-	-/-/-	-/-/-	+/-/-	+/-/-	-/-/-	+/-/-	-/-/-	+/-/-	+/-/-	+/-/-	+/-/-	-/-/-	+/-/-	+/-/-
b3959	argB	M	+/-/-	+/-/-	+/-/-	+/-/-	+/-/-	+/-/-	-/-/-	+/-/-	+/-/-	+/-/-	-/-/-	+/-/-	+/-/-	+/-/-	+/-/-	+/-/-	+/-/-	+/-/-	+/-/-	+/-/-	+/-/-	-/-/-	+/-/-	+/-/-	+/-/-	+/-/-	+/-/-	+/-/-	+/-/-	+/-/-	+/-/-	+/-/-	+/-/-	-/-/-	-/-/-	+/-/-	+/-/-	-/-/-	+/-/-	-/-/-	+/-/-	+/-/-	+/-/-	+/-/-	-/-/-	+/-/-	+/-/-
b3991	thiG	M	+/+/+	+/+/-	+/+/+	+/+/+	+/+/+	+/+/+	+/+/+	+/+/-	+/+/+	+/+/+	-/+/+	+/+/-	+/+/+	+/+/+	+/+/+	+/+/+	+/+/+	+/+/+	+/+/+	+/+/+	+/+/+	-/+/+	+/+/+	+/+/+	+/+/+	+/+/+	+/+/+	+/+/+	+/+/+	+/+/+	+/+/+	+/+/+	+/-/-	-/+/+	-/+/-	+/+/+	+/+/+	-/+/-	+/+/+	+/+/+	+/+/+	+/+/+	+/+/+	+/+/+	-/+/-	+/+/+	+/+/+
b3992	thiF	M	+/+/+	+/+/-	+/+/+	+/+/+	+/+/+	+/+/+	+/+/+	+/+/-	+/+/+	+/+/+	-/+/+	+/+/-	+/+/+	+/+/+	+/+/+	+/+/+	+/+/+	+/+/+	+/+/+	+/+/+	+/+/+	-/+/+	+/+/+	+/+/+	+/+/+	+/+/+	+/+/+	+/+/+	+/+/+	+/+/+	+/+/+	+/+/+	+/-/-	-/+/+	-/+/-	+/+/+	+/+/+	-/+/-	+/+/+	+/+/+	+/+/+	+/+/+	+/+/+	+/+/+	-/+/-	+/+/+	+/+/+
b3993	thiE	M	+/+/+	+/+/-	+/+/+	+/+/+	+/+/+	+/+/+	+/+/+	+/+/-	+/+/+	+/+/+	-/+/+	+/+/-	+/+/+	+/+/+	+/+/+	+/+/+	+/+/+	+/+/+	+/+/+	+/+/+	+/+/+	-/+/+	+/+/+	+/+/+	+/+/+	+/+/+	+/+/+	+/+/+	+/+/+	+/+/+	+/+/+	+/+/+	+/-/-	-/+/+	-/+/-	+/+/+	+/+/+	-/+/-	+/+/+	+/+/+	+/+/+	+/+/+	+/+/+	+/+/+	-/+/-	+/+/+	+/+/+
b3994	thiC	M	+/+/+	+/+/-	+/+/+	+/+/+	+/+/+	+/+/+	+/+/+	+/+/-	+/+/+	+/+/+	-/+/+	+/+/-	+/+/+	+/+/+	+/+/+	+/+/+	+/+/+	+/+/+	+/+/+	+/+/+	+/+/+	-/+/+	+/+/+	+/+/+	+/+/+	+/+/+	+/+/+	+/+/+	+/+/+	+/+/+	+/+/+	+/+/+	+/-/-	-/+/+	-/+/-	+/+/+	+/+/+	-/+/-	+/+/+	+/+/+	+/+/+	+/+/+	+/+/+	+/+/+	-/+/-	+/+/+	+/+/+
b4005	purD	M	+/-/-	+/-/-	+/-/-	+/-/-	+/-/-	+/-/-	-/-/-	+/-/-	+/-/-	+/-/-	-/-/-	+/-/-	+/-/-	+/-/-	+/-/-	+/-/-	+/-/-	+/-/-	+/-/-	+/-/-	+/-/-	-/-/-	+/-/-	+/-/-	+/-/-	+/-/-	+/-/-	+/-/-	+/-/-	+/-/-	+/-/-	+/-/-	+/-/-	+/-/-	-/-/-	+/-/-	+/-/-	-/-/-	+/-/-	+/-/-	+/-/-	+/+/+	+/+/+	+/-/-	-/-/-	+/-/-	+/-/-
b4006	purH	M	+/-/-	+/-/-	+/-/-	+/-/-	+/-/-	+/-/-	+/-/-	+/-/-	+/-/-	+/-/-	+/-/-	+/-/-	+/-/-	+/-/-	+/-/-	+/-/-	+/-/-	+/-/-	+/-/-	+/-/-	+/-/-	-/-/-	+/-/-	+/-/-	+/-/-	+/-/-	+/-/-	+/-/-	+/-/-	+/-/-	+/-/-	+/-/-	+/-/-	+/-/-	-/-/-	+/-/-	+/-/-	-/-/-	-/-/-	+/-/-	+/-/-	+/-/-	+/-/-	-/-/-	-/-/-	+/-/-	+/-/-
b4013	metA	M	+/-/-	+/-/-	+/-/-	+/-/-	+/-/-	+/-/-	+/-/-	+/-/-	+/-/-	+/-/-	-/-/-	+/-/-	+/-/-	+/-/-	+/-/-	+/-/-	+/-/-	+/-/-	+/-/-	+/-/-	+/-/-	-/-/-	+/-/-	+/-/-	+/-/-	+/-/-	+/-/-	+/-/-	+/-/-	+/-/-	+/-/-	+/-/-	+/-/-	+/-/-	-/-/-	+/-/-	+/-/-	-/-/-	+/-/-	+/-/-	+/-/-	+/-/-	+/-/-	+/-/-	-/-/-	+/-/-	+/-/-
b4025	pgi	M	+/-/-	+/-/-	+/-/-	+/-/-	+/+/+	+/-/-	+/-/-	+/-/-	+/+/+	+/-/-	-/-/-	+/-/-	+/-/-	+/-/-	+/-/-	+/-/-	+/-/-	+/-/-	+/-/-	+/-/-	+/-/-	-/-/-	+/+/+	+/-/-	+/-/-	+/-/-	+/-/-	+/-/-	+/-/-	+/+/+	+/+/+	+/+/+	+/-/-	+/-/-	-/-/-	+/-/-	+/+/+	-/+/-	+/-/-	+/-/-	+/+/+	+/-/-	+/-/-	+/-/-	-/-/-	+/-/-	+/-/-
b4033	malF	M	+/+/+	+/+/-	+/+/+	+/+/+	+/+/+	+/+/+	+/+/+	+/+/-	+/+/+	+/+/+	-/+/+	+/+/-	+/+/+	+/+/+	+/+/+	+/+/+	+/+/+	+/+/+	+/+/+	+/+/+	+/+/+	-/+/+	+/+/+	+/+/+	+/+/+	+/+/+	+/+/+	+/+/+	+/+/+	+/+/+	+/-/-	+/+/+	+/-/-	-/+/+	-/+/-	+/+/+	+/+/+	+/+/-	+/+/+	+/+/+	+/-/-	+/+/+	+/+/+	+/+/+	-/+/-	+/+/+	+/+/+
b4035	malK	M	+/+/+	+/+/-	+/+/+	+/+/+	+/+/+	+/+/+	+/+/+	+/+/-	+/+/+	+/+/+	-/+/+	+/+/-	+/+/+	+/+/+	+/+/+	+/+/+	+/+/+	+/+/+	+/+/+	+/+/+	+/+/+	-/+/+	+/+/+	+/+/+	+/+/+	+/+/+	+/+/+	+/+/+	+/+/+	+/+/+	+/-/-	+/+/+	+/-/-	+/+/+	-/+/-	+/+/+	+/+/+	-/+/-	+/+/+	+/+/+	+/-/-	+/+/+	+/+/+	+/+/+	-/+/-	+/+/+	+/+/+
b4039	ubiC	M	+/+/+	+/+/-	+/+/+	+/+/+	+/+/+	+/+/+	+/+/+	+/+/-	+/+/+	+/+/+	-/+/+	+/+/-	+/+/+	+/+/+	+/+/+	+/+/+	+/+/+	+/+/+	+/+/+	+/+/+	+/+/+	-/+/+	+/+/+	+/+/+	+/+/+	+/+/+	+/+/+	+/+/+	+/+/+	+/+/+	+/+/+	+/+/+	+/-/-	-/+/+	-/+/-	+/+/+	+/+/+	-/+/-	+/+/+	+/+/+	+/+/+	+/+/+	+/+/+	+/+/+	-/+/-	+/+/+	+/+/+
b4041	plsB	M	+/-/-	+/-/-	+/-/-	+/-/-	+/-/-	+/-/-	-/-/-	+/-/-	+/-/-	+/-/-	-/-/-	+/-/-	+/-/-	+/-/-	+/-/-	+/-/-	+/-/-	+/-/-	+/-/-	+/-/-	+/-/-	+/-/-	+/-/-	+/-/-	+/-/-	+/-/-	+/-/-	+/-/-	+/-/-	+/-/-	+/-/-	+/-/-	+/-/-	-/-/-	-/-/-	+/-/-	+/-/-	+/-/-	+/-/-	+/-/-	+/-/-	+/-/-	+/-/-	+/-/-	-/-/-	+/-/-	+/-/-
b4054	tyrB	M	+/+/+	+/+/-	+/+/+	+/+/+	+/+/+	+/+/+	+/+/+	+/+/-	+/+/+	+/+/+	-/+/+	+/+/-	+/+/+	+/+/+	+/+/+	+/+/+	+/+/+	+/+/+	+/+/+	+/+/+	+/+/+	-/+/+	+/+/+	+/+/+	+/+/+	+/+/+	+/+/+	+/+/+	+/+/+	+/+/+	+/+/+	+/+/+	+/-/-	+/+/+	-/+/-	+/+/+	+/+/+	-/+/-	+/+/+	+/+/+	+/+/+	+/+/+	+/+/+	+/+/+	-/+/-	+/+/+	+/+/+
b4063	soxR	R	+/+/+	+/+/-	+/+/+	+/+/+	+/+/+	+/+/+	+/+/+	+/+/-	+/+/+	+/+/+	-/+/+	+/+/-	+/+/+	+/+/+	+/+/+	+/+/+	+/+/+	+/+/+	+/+/+	+/+/+	+/+/+	-/+/+	+/+/+	+/+/+	+/+/+	+/+/+	+/+/+	+/+/+	+/+/+	+/+/+	+/+/+	+/+/+	+/-/-	-/+/+	-/+/-	+/+/+	+/+/+	-/+/-	+/+/+	+/+/+	+/+/+	+/+/+	+/+/+	+/+/+	-/+/-	+/+/+	+/+/+
b4090	rpiB	M	+/+/+	+/+/-	+/+/+	+/+/+	+/+/+	+/+/+	+/+/+	+/+/-	+/+/+	+/+/+	-/+/+	+/+/-	+/+/+	+/+/+	+/+/+	+/+/+	+/+/+	+/+/+	+/+/+	+/+/+	+/+/+	-/+/+	+/+/+	+/+/+	+/+/+	+/+/+	+/+/+	+/+/+	+/+/+	+/+/+	+/+/+	+/+/+	+/-/-	+/+/+	-/+/-	+/+/+	+/+/+	+/+/-	+/+/+	+/+/+	+/+/+	+/+/+	+/+/+	+/+/+	-/+/-	+/+/+	+/+/+
b4111	proP	M	+/+/+	+/+/-	+/+/+	+/+/+	+/+/+	+/+/+	-/+/+	+/+/-	+/+/+	+/+/+	-/+/+	+/+/-	+/+/+	+/+/+	+/+/+	+/+/+	+/+/+	+/+/+	+/+/+	+/+/+	+/+/+	-/+/+	+/+/+	+/+/+	+/+/+	+/+/+	+/+/+	+/+/+	+/+/+	+/+/+	+/+/+	+/+/+	+/-/-	+/+/+	-/+/-	+/+/+	+/+/+	-/+/-	+/+/+	+/+/+	+/+/+	+/+/+	+/+/+	+/+/+	-/+/-	+/+/+	+/+/+
b4117	adiA	M	+/+/+	+/+/-	+/+/+	+/+/+	+/+/+	+/+/+	-/+/+	+/+/-	+/+/+	+/+/+	-/+/+	+/+/-	+/+/+	+/+/+	+/+/+	+/+/+	+/+/+	+/+/+	+/+/+	+/+/+	+/+/+	-/+/+	+/+/+	+/+/+	+/+/+	+/+/+	+/+/+	+/+/+	+/+/+	+/+/+	+/+/+	+/+/+	+/-/-	+/+/+	-/+/-	+/+/+	+/+/+	-/+/-	+/+/+	+/+/+	+/+/+	+/+/+	+/+/+	+/+/+	-/+/-	+/+/+	+/+/+
b4118	melR	R	+/+/+	+/+/-	+/+/+	+/+/+	+/+/+	+/+/+	+/+/+	+/+/-	+/+/+	+/+/+	-/+/+	+/+/-	+/+/+	+/+/+	+/+/+	+/+/+	+/+/+	+/+/+	+/+/+	+/+/+	+/+/+	-/+/+	+/+/+	+/+/+	+/+/+	+/+/+	+/+/+	+/+/+	+/+/+	+/+/+	+/+/+	-/+/-	+/-/-	+/+/+	-/+/-	+/+/+	+/+/+	-/+/-	+/+/+	+/+/+	+/+/+	+/+/+	+/+/+	+/+/+	-/+/-	+/+/+	+/+/+
b4119	melA	M	+/+/+	+/+/-	+/+/+	+/+/+	+/+/+	+/+/+	-/+/+	+/+/-	+/+/+	+/+/+	-/+/+	+/+/-	+/+/+	+/+/+	+/+/+	+/+/+	+/+/+	+/+/+	+/+/+	+/+/+	+/+/+	-/+/+	+/+/+	+/+/+	+/+/+	+/+/+	+/+/+	+/+/+	+/+/+	+/+/+	+/+/+	-/-/-	+/-/-	+/+/+	-/+/-	+/+/+	+/+/+	-/+/-	+/+/+	+/+/+	+/+/+	+/+/+	+/+/+	+/+/+	-/+/-	+/+/+	+/+/+
b4120	melB	M	+/+/+	+/+/-	+/+/+	+/+/+	+/+/+	+/+/+	+/+/+	+/+/-	+/+/+	+/+/+	-/+/+	+/+/-	+/+/+	+/+/+	+/+/+	+/+/+	+/+/+	+/+/+	+/+/+	+/+/+	+/+/+	-/+/+	+/+/+	+/+/+	+/+/+	+/+/+	+/+/+	+/+/+	+/+/+	+/+/+	+/+/+	+/-/-	+/-/-	+/+/+	-/+/-	+/+/+	+/+/+	-/+/-	+/+/+	+/+/+	+/+/+	+/+/+	+/+/+	+/+/+	-/+/-	+/+/+	+/+/+
b4138	dcuA	M	+/+/+	+/+/-	+/+/+	+/+/+	+/+/+	+/+/+	+/+/+	+/+/-	+/+/+	+/+/+	-/+/+	+/+/-	+/+/+	+/+/+	+/+/+	+/+/+	+/+/+	+/+/+	+/+/+	+/+/+	+/+/+	-/+/+	+/+/+	+/+/+	+/+/-	+/+/+	+/+/+	+/+/+	+/+/+	+/+/+	+/+/+	+/+/+	+/-/-	-/+/+	-/+/-	+/+/+	+/+/+	-/+/-	+/+/+	+/+/+	+/+/+	+/+/+	+/+/+	+/+/+	+/+/-	+/+/+	+/+/+
b0067	thiP	M	+/+/+	+/+/-	+/+/+	+/+/+	+/+/+	+/+/+	+/+/+	+/+/-	+/+/+	+/+/+	-/+/+	+/+/-	+/+/+	+/+/+	+/+/+	+/+/+	+/+/+	+/+/+	+/+/+	+/+/+	+/+/+	-/+/+	+/+/+	+/+/+	+/+/+	+/+/+	+/+/+	+/+/+	+/+/+	+/+/+	+/+/+	+/+/+	+/-/-	+/+/+	-/+/-	+/+/+	+/+/+	-/+/-	+/+/+	+/+/+	+/+/+	+/+/+	+/+/+	+/+/+	-/+/-	+/+/+	+/+/+
b0162	cdaR	R	+/+/+	+/+/-	-/+/-	+/+/+	+/+/+	+/+/+	+/+/+	+/+/-	+/+/+	+/+/+	-/+/+	+/+/-	+/+/+	+/+/+	+/+/+	+/+/+	+/+/+	+/+/+	+/+/+	+/+/+	+/+/+	+/+/+	+/+/+	+/+/+	+/+/+	+/+/+	+/+/+	+/+/+	+/+/+	+/+/+	+/+/+	+/+/+	+/-/-	+/+/+	-/+/-	+/+/+	+/+/+	-/+/-	+/+/+	+/+/+	+/+/+	+/+/+	+/+/+	+/+/+	-/+/-	+/+/+	-/+/-
b0200	gmhB	M	+/-/-	+/-/-	+/-/-	+/-/-	+/-/-	+/-/-	+/-/-	+/-/-	+/-/-	+/-/-	-/-/-	+/-/-	+/-/-	+/-/-	+/-/-	+/-/-	+/-/-	+/-/-	+/-/-	+/-/-	+/-/-	-/-/-	+/-/-	+/-/-	+/-/-	+/-/-	+/-/-	+/-/-	+/-/-	+/-/-	+/-/-	+/-/-	+/-/-	+/-/-	-/-/-	+/-/-	+/-/-	-/-/-	+/-/-	+/-/-	+/-/-	+/-/-	+/-/-	+/-/-	-/-/-	+/-/-	+/-/-
b0207	dkgB	M	+/+/+	+/+/-	+/+/+	+/+/+	+/+/+	+/+/+	+/+/+	+/+/-	+/+/+	+/+/+	-/+/+	+/+/-	+/+/+	+/+/+	+/+/+	+/+/+	+/+/+	+/+/+	+/+/+	+/+/+	+/+/+	-/+/+	+/+/+	+/+/+	+/+/+	+/+/+	+/+/+	+/+/+	+/+/+	+/+/+	+/+/+	+/+/+	+/-/-	+/+/+	-/+/-	+/+/+	+/+/+	-/+/-	+/+/+	+/+/+	+/+/+	+/+/+	+/+/+	+/+/+	-/+/-	+/+/+	+/+/+
b0212	gloB	M	+/+/+	+/+/-	+/+/+	+/+/+	+/+/+	+/+/+	+/+/+	+/+/-	+/+/+	+/+/+	-/+/+	+/+/-	+/+/+	+/+/+	+/+/+	+/+/+	+/+/+	+/+/+	+/+/+	+/+/+	+/+/+	-/+/+	+/+/+	+/+/+	+/+/+	+/+/+	+/+/+	+/+/+	+/+/+	+/+/+	+/+/+	+/+/+	+/-/-	+/+/+	-/+/-	+/+/+	+/+/+	-/+/-	+/+/+	+/+/+	+/+/+	+/+/+	+/+/+	+/+/+	-/+/-	+/+/+	+/+/+
b0323	yahI	M	+/+/+	+/+/-	+/+/+	+/+/+	+/+/+	+/+/+	-/+/+	+/+/-	+/+/+	+/+/+	-/+/+	+/+/-	+/+/+	+/+/+	+/+/+	+/+/+	+/+/+	+/+/+	+/+/+	+/+/+	+/+/+	-/+/+	+/+/+	+/+/+	+/+/+	+/+/+	+/+/+	+/+/+	+/+/+	+/+/+	+/+/+	+/+/+	+/-/-	-/+/+	-/+/-	+/+/+	+/+/+	-/+/-	+/+/+	+/+/+	+/+/+	+/+/+	+/+/+	+/+/+	-/+/-	+/+/+	+/+/+
b0333	prpC	M	+/+/+	+/+/-	+/+/+	+/+/+	+/+/+	+/+/+	+/+/+	+/+/-	+/+/+	+/+/+	-/+/+	+/+/-	+/+/+	+/+/+	+/+/+	+/+/+	+/+/+	+/+/+	+/+/+	+/+/+	+/+/+	+/+/+	+/+/+	+/+/+	+/+/+	+/+/+	+/+/+	+/+/+	+/+/+	+/+/+	+/+/+	+/+/+	+/-/-	+/+/+	-/+/-	+/+/+	+/+/+	+/+/-	+/+/+	+/+/+	+/+/+	+/+/+	+/+/+	+/+/+	-/+/-	+/+/+	+/+/+
b0334	prpD	M	+/+/+	+/+/-	+/+/+	+/+/+	+/+/+	+/+/+	+/+/+	+/+/-	+/+/+	+/+/+	-/+/+	+/+/-	+/+/+	+/+/+	+/+/+	+/+/+	+/+/+	+/+/+	+/+/+	+/+/+	+/+/+	+/+/+	+/+/+	+/+/+	+/+/+	+/+/+	+/+/+	+/+/+	+/+/+	+/+/+	+/+/+	+/+/+	+/-/-	+/+/+	-/+/-	+/+/+	+/+/+	-/+/-	+/+/+	+/+/+	+/+/+	+/+/+	+/+/+	+/+/+	-/+/-	+/+/+	+/+/+
b0335	prpE	M	+/+/+	+/+/-	+/+/+	+/+/+	+/+/+	+/+/+	+/+/+	+/+/-	+/+/+	+/+/+	-/+/+	+/+/-	+/+/+	+/+/+	+/+/+	+/+/+	+/+/+	+/+/+	+/+/+	+/+/+	+/+/+	-/+/+	+/+/+	+/+/+	+/+/+	+/+/+	+/+/+	+/+/+	+/+/+	+/+/+	+/+/+	+/+/+	+/-/-	+/+/+	-/+/-	+/+/+	+/+/+	-/+/-	+/+/+	+/+/+	+/+/+	+/+/+	+/+/+	+/+/+	-/+/-	+/+/+	+/+/+
b0347	mhpA	M	+/+/+	+/+/-	+/+/+	+/+/+	+/+/+	+/+/+	+/+/+	+/+/-	+/+/+	+/+/+	-/+/+	+/+/-	+/+/+	+/+/+	+/+/+	+/+/+	+/+/+	+/+/+	+/+/+	+/+/+	+/+/+	-/+/+	+/+/+	+/+/+	+/+/+	+/+/+	+/+/+	+/+/+	+/+/+	+/+/+	+/+/+	+/+/+	+/-/-	+/+/+	-/+/-	+/+/+	+/+/+	-/+/-	+/+/+	+/+/+	+/+/+	+/+/+	+/+/+	+/+/+	-/+/-	+/+/+	+/+/+
b0365	tauA	M	+/+/+	+/+/-	+/+/+	+/+/+	+/+/+	+/+/+	+/+/+	+/+/-	+/+/+	+/+/+	-/+/+	+/+/-	+/+/+	+/+/+	+/+/+	+/+/+	+/+/+	+/+/+	+/+/+	+/+/+	+/+/+	+/+/+	+/+/+	+/+/+	+/+/+	+/+/+	+/+/+	+/+/+	+/+/+	+/+/+	+/+/+	+/+/+	+/-/-	+/+/+	-/+/-	+/+/+	+/+/+	-/+/-	+/+/+	+/+/+	+/+/+	+/+/+	+/+/+	+/+/+	-/+/-	+/+/+	+/+/+
b0366	tauB	M	+/+/+	+/+/-	+/+/+	+/+/+	+/+/+	+/+/+	+/+/+	+/+/-	+/+/+	+/+/+	-/+/+	+/+/-	+/+/+	+/+/+	+/+/+	+/+/+	+/+/+	+/+/+	+/+/+	+/+/+	+/+/+	-/+/+	+/+/+	+/+/+	+/+/+	+/+/+	+/+/+	+/+/+	+/+/+	+/+/+	+/+/+	+/+/+	+/-/-	+/+/+	-/+/-	+/+/+	+/+/+	-/+/-	+/+/+	+/+/+	+/+/+	+/+/+	+/+/+	+/+/+	-/+/-	+/+/+	+/+/+
b0367	tauC	M	+/+/+	+/+/-	+/+/+	+/+/+	+/+/+	+/+/+	+/+/+	+/+/-	+/+/+	+/+/+	-/+/+	+/+/-	+/+/+	+/+/+	+/+/+	+/+/+	+/+/+	+/+/+	+/+/+	+/+/+	+/+/+	-/+/+	+/+/+	+/+/+	+/+/+	+/+/+	+/+/+	+/+/+	+/+/+	+/+/+	+/+/+	+/+/+	+/-/-	+/+/+	-/+/-	+/+/+	+/+/+	-/+/-	+/+/+	+/+/+	+/+/+	+/+/+	+/+/+	+/+/+	-/+/-	+/+/+	+/+/+
b0615	citF	M	+/+/+	+/+/-	+/+/+	+/+/+	+/+/+	+/+/+	+/+/+	+/+/-	+/+/+	+/+/+	-/+/+	+/+/-	+/+/+	+/+/+	+/+/+	+/+/+	+/+/+	+/+/+	+/+/+	+/+/+	+/+/+	-/+/+	+/+/+	+/+/+	+/+/+	+/+/+	+/+/+	+/+/+	+/+/+	+/+/+	+/+/+	+/+/+	+/-/-	+/+/+	-/+/-	+/+/+	+/+/+	-/+/-	+/+/+	+/+/+	+/+/+	+/+/+	+/+/+	+/+/+	-/+/-	+/+/+	+/+/+
b0616	citE	M	+/+/+	+/+/-	+/+/+	+/+/+	+/+/+	+/+/+	+/+/+	+/+/-	+/+/+	+/+/+	-/+/+	+/+/-	+/+/+	+/+/+	+/+/+	+/+/+	+/+/+	+/+/+	+/+/+	+/+/+	+/+/+	-/+/+	+/+/+	+/+/+	+/+/+	+/+/+	+/+/+	+/+/+	+/+/+	+/+/+	+/+/+	+/+/+	+/-/-	+/+/+	-/+/-	+/+/+	+/+/+	-/+/-	+/+/+	+/+/+	+/+/+	+/+/+	+/+/+	+/+/+	-/+/-	+/+/+	+/+/+
b0617	citD	M	+/+/+	+/+/-	+/+/+	+/+/+	+/+/+	+/+/+	+/+/+	+/+/-	+/+/+	+/+/+	-/+/+	+/+/-	+/+/+	+/+/+	+/+/+	+/+/+	+/+/+	+/+/+	+/+/+	+/+/+	+/+/+	-/+/+	+/+/+	+/+/+	+/+/+	+/+/+	+/+/+	+/+/+	+/+/+	+/+/+	+/+/+	+/+/+	+/-/-	+/+/+	-/+/-	+/+/+	+/+/+	-/+/-	+/+/+	+/+/+	+/+/+	+/+/+	+/+/+	+/+/+	-/+/-	+/+/+	+/+/+
b0825	fsaA	M	+/+/+	+/+/-	+/+/+	+/+/+	+/+/+	+/+/+	+/+/+	+/+/-	+/+/+	+/+/+	-/+/+	+/+/-	+/+/+	+/+/+	+/+/+	+/+/+	+/+/+	+/+/+	+/+/+	+/+/+	+/+/+	+/+/+	+/+/+	+/+/+	+/+/+	+/+/+	+/+/+	+/+/+	+/+/+	+/+/+	+/+/+	+/+/+	+/-/-	+/+/+	-/+/-	+/+/+	+/+/+	-/+/-	+/+/+	+/+/+	+/+/+	+/+/+	+/+/+	+/+/+	-/+/-	+/+/+	+/+/+
b0870	ltaE	M	+/+/+	+/+/-	+/+/+	+/+/+	+/+/+	+/+/+	+/+/+	+/+/-	+/+/+	+/+/+	-/+/+	+/+/-	+/+/+	+/+/+	+/+/+	+/+/+	+/+/+	+/+/+	+/+/+	+/+/+	+/+/+	-/+/+	+/+/+	+/+/+	+/+/+	+/+/+	+/+/+	+/+/+	+/+/+	+/+/+	+/+/+	+/+/+	+/-/-	+/+/+	-/+/-	+/+/+	+/+/+	-/+/-	+/+/+	+/+/+	+/+/+	+/+/+	+/+/+	+/+/+	-/+/-	+/+/+	+/+/+
b1385	feaB	R	+/+/+	+/+/-	+/+/+	+/+/+	+/+/+	+/+/+	+/+/+	+/+/-	+/+/+	+/+/+	-/+/+	+/+/-	+/+/+	+/+/+	+/+/+	+/+/+	+/+/+	+/+/+	+/+/+	+/+/+	+/+/+	+/+/+	+/+/+	+/+/+	+/+/+	+/+/+	+/+/+	+/+/+	+/+/+	+/+/+	+/+/+	+/+/+	+/-/-	+/+/+	-/+/-	+/+/+	+/+/+	-/+/-	+/+/+	+/+/+	+/+/+	+/+/+	+/+/+	+/+/+	-/+/-	+/+/+	+/+/+
b1440	ydcS	M	+/+/+	+/+/-	+/+/+	+/+/+	+/+/+	+/+/+	+/+/+	+/+/-	+/+/+	+/+/+	-/+/+	+/+/-	+/+/+	+/+/+	+/+/+	+/+/+	+/+/+	+/+/+	+/+/+	+/+/+	+/+/+	-/+/+	+/+/+	+/+/+	+/+/+	+/+/+	+/+/+	+/+/+	+/+/+	+/+/+	+/+/+	+/+/+	+/-/-	+/+/+	-/+/-	+/+/+	+/+/+	-/+/-	+/+/+	+/+/+	+/+/+	+/+/+	+/+/+	+/+/+	-/+/-	+/+/+	+/+/+
b1441	ydcT	M	+/+/+	+/+/-	+/+/+	+/+/+	+/+/+	+/+/+	+/+/+	+/+/-	+/+/+	+/+/+	-/+/+	+/+/-	+/+/+	+/+/+	+/+/+	+/+/+	+/+/+	+/+/+	+/+/+	+/+/+	+/+/+	-/+/+	+/+/+	+/+/+	+/+/+	+/+/+	+/+/+	+/+/+	+/+/+	+/+/+	+/+/+	+/+/+	+/-/-	+/+/+	-/+/-	+/+/+	+/+/+	-/+/-	+/+/+	+/+/+	+/+/+	+/+/+	+/+/+	+/+/+	+/+/-	+/+/+	+/+/+
b1442	ydcU	M	+/+/+	+/+/-	+/+/+	+/+/+	+/+/+	+/+/+	+/+/+	+/+/-	+/+/+	+/+/+	-/+/+	+/+/-	+/+/+	+/+/+	+/+/+	+/+/+	+/+/+	+/+/+	+/+/+	+/+/+	+/+/+	-/+/+	+/+/+	+/+/+	+/+/+	+/+/+	+/+/+	+/+/+	+/+/+	+/+/+	+/+/+	+/+/+	+/-/-	+/+/+	-/+/-	+/+/+	+/+/+	-/+/-	+/+/+	+/+/+	+/+/+	+/+/+	+/+/+	+/+/+	-/+/-	+/+/+	+/+/+
b1443	ydcV	M	+/+/+	+/+/-	+/+/+	+/+/+	+/+/+	+/+/+	+/+/+	+/+/-	+/+/+	+/+/+	-/+/+	+/+/-	+/+/+	+/+/+	+/+/+	+/+/+	+/+/+	+/+/+	+/+/+	+/+/+	+/+/+	-/+/+	+/+/+	+/+/+	+/+/+	+/+/+	+/+/+	+/+/+	+/+/+	+/+/+	+/+/+	+/+/+	+/-/-	+/+/+	-/+/-	+/+/+	+/+/+	-/+/-	+/+/+	+/+/+	+/+/+	+/+/+	+/+/+	+/+/+	-/+/-	+/+/+	+/+/+
b1519	tam	M	+/+/+	+/+/-	+/+/+	+/+/+	+/+/+	+/+/+	+/+/+	+/+/-	+/+/+	+/+/+	-/+/+	+/+/-	+/+/+	+/+/+	+/+/+	+/+/+	+/+/+	+/+/+	+/+/+	+/+/+	+/+/+	+/+/+	+/+/+	+/+/+	+/+/+	+/+/+	+/+/+	+/+/+	+/+/+	+/+/+	+/+/+	+/+/+	+/-/-	+/+/+	-/+/-	+/+/+	+/+/+	-/+/-	+/+/+	+/+/+	+/+/+	+/+/+	+/+/+	+/+/+	-/+/-	+/+/+	+/+/+
b1524	yneH	M	+/+/+	+/+/-	+/+/+	+/+/+	+/+/+	+/+/+	+/+/+	+/+/-	+/+/+	+/+/+	+/+/+	+/+/-	+/+/+	+/+/+	+/+/+	+/+/+	+/+/+	+/+/+	+/+/+	+/+/+	+/+/+	+/+/+	+/+/+	+/+/+	+/+/+	+/+/+	+/+/+	+/+/+	+/+/+	+/+/+	+/+/+	+/+/+	+/-/-	+/+/+	-/+/-	+/+/+	+/+/+	+/+/-	+/+/+	+/+/+	+/+/+	+/+/+	+/+/+	+/+/+	+/+/-	+/+/+	+/+/+
b1636	pdxY	M	+/+/+	+/+/-	+/+/+	+/+/+	+/+/+	+/+/+	+/+/+	+/+/-	+/+/+	+/+/+	-/+/+	+/+/-	+/+/+	+/+/+	+/+/+	+/+/+	+/+/+	+/+/+	+/+/+	+/+/+	+/+/+	+/+/+	+/+/+	+/+/+	+/+/+	+/+/+	+/+/+	+/+/+	+/+/+	+/+/+	+/+/+	+/+/+	+/-/-	+/+/+	-/+/-	+/+/+	+/+/+	-/+/-	+/+/+	+/+/+	+/+/+	+/+/+	+/+/+	+/+/+	-/+/-	+/+/+	+/+/+
b1744	astE	M	+/+/+	+/+/-	+/+/+	+/+/+	+/+/+	+/+/+	+/+/+	+/+/-	+/+/+	+/+/+	-/+/+	+/+/-	+/+/+	+/+/+	+/+/+	+/+/+	+/+/+	+/+/+	+/+/+	+/+/+	+/+/+	-/+/+	+/+/+	+/+/+	+/+/+	+/+/+	+/+/+	+/+/+	+/+/+	+/+/+	+/+/+	+/+/+	+/-/-	+/+/+	-/+/-	+/+/+	+/+/+	-/+/-	+/+/+	+/+/+	+/+/+	+/+/+	+/+/+	+/+/+	-/+/-	+/+/+	+/+/+
b1745	astB	M	+/+/+	+/+/-	+/+/+	+/+/+	+/+/+	+/+/+	+/+/+	+/+/-	+/+/+	+/+/+	-/+/+	+/+/-	+/+/+	+/+/+	+/+/+	+/+/+	+/+/+	+/+/+	+/+/+	+/+/+	+/+/+	-/+/+	+/+/+	+/+/+	+/+/+	+/+/+	+/+/+	+/+/+	+/+/+	+/+/+	+/+/+	+/+/+	+/-/-	+/+/+	-/+/-	+/+/+	+/+/+	-/+/-	+/+/+	+/+/+	+/+/+	+/+/+	+/+/+	+/+/+	-/+/-	+/+/+	+/+/+
b1746	astD	M	+/+/+	+/+/-	+/+/+	+/+/+	+/+/+	+/+/+	+/+/+	+/+/-	+/+/+	+/+/+	-/+/+	+/+/-	+/+/+	+/+/+	+/+/+	+/+/+	+/+/+	+/+/+	+/+/+	+/+/+	+/+/+	-/+/+	+/+/+	+/+/+	+/+/+	+/+/+	+/+/+	+/+/+	+/+/+	+/+/+	+/+/+	+/+/+	+/-/-	+/+/+	-/+/-	+/+/+	+/+/+	-/+/-	+/+/+	+/+/+	+/+/+	+/+/+	+/+/+	+/+/+	-/+/-	+/+/+	+/+/+
b1747	astA	M	+/+/+	+/+/-	+/+/+	+/+/+	+/+/+	+/+/+	+/+/+	+/+/-	+/+/+	+/+/+	-/+/+	+/+/-	+/+/+	+/+/+	+/+/+	+/+/+	+/+/+	+/+/+	+/+/+	-/+/+	+/+/+	-/+/+	+/+/+	+/+/+	+/+/+	+/+/+	+/+/+	+/+/+	+/+/+	+/+/+	+/+/+	+/+/+	+/-/-	+/+/+	-/+/-	+/+/+	-/+/+	+/+/-	+/+/+	+/+/+	+/+/+	+/+/+	+/+/+	+/+/+	-/+/-	+/+/+	+/+/+
b1748	astC	M	+/+/+	+/+/-	+/+/+	+/+/+	+/+/+	+/+/+	+/+/+	+/+/-	+/+/+	+/+/+	-/+/+	+/+/-	+/+/+	+/+/+	+/+/+	+/+/+	+/+/+	+/+/+	+/+/+	+/+/+	+/+/+	-/+/+	+/+/+	+/+/+	+/+/+	+/+/+	+/+/+	+/+/+	+/+/+	+/+/+	+/+/+	+/+/+	+/-/-	+/+/+	-/+/-	+/+/+	+/+/+	+/+/-	+/+/+	+/+/+	+/+/+	+/+/+	+/+/+	+/+/+	-/+/-	+/+/+	+/+/+
b1801	yeaV	M	+/+/+	+/+/-	+/+/+	+/+/+	+/+/+	+/+/+	+/+/+	+/+/-	+/+/+	+/+/+	-/+/+	+/+/-	+/+/+	+/+/+	+/+/+	+/+/+	+/+/+	+/+/+	+/+/+	+/+/+	+/+/+	-/+/+	+/+/+	+/+/+	+/+/+	+/+/+	+/+/+	+/+/+	+/+/+	+/+/+	+/+/+	+/+/+	+/-/-	+/+/+	-/+/-	+/+/+	+/+/+	-/+/-	+/+/+	+/+/+	+/+/+	+/+/+	+/+/+	+/+/+	-/+/-	+/+/+	+/+/+
b1827	kdgR	R	+/+/+	+/+/-	+/+/+	+/+/+	+/+/+	+/+/+	+/+/+	+/+/-	+/+/+	+/+/+	-/+/+	+/+/-	+/+/+	+/+/+	+/+/+	+/+/+	+/+/+	+/+/+	+/+/+	+/+/+	+/+/+	-/+/+	+/+/+	+/+/+	+/+/+	+/+/+	+/+/+	+/+/+	+/+/+	+/+/+	+/+/+	+/+/+	+/-/-	+/+/+	-/+/-	+/+/+	+/+/+	-/+/-	+/+/+	+/+/+	+/+/+	+/+/+	+/+/+	+/+/+	-/+/-	+/+/+	+/+/+
b1899	araH	M	+/+/+	+/+/-	+/+/+	+/+/+	+/+/+	+/+/+	+/+/+	+/+/-	+/+/+	+/+/+	-/+/+	+/+/-	+/+/+	+/+/+	+/+/+	+/+/+	+/+/+	+/+/+	+/+/+	+/+/+	+/+/+	+/+/+	+/+/+	+/+/+	+/+/+	+/+/+	+/+/+	+/+/+	+/+/+	+/+/+	+/+/+	+/+/+	+/-/-	+/+/+	-/+/-	+/+/+	+/+/+	-/+/-	+/+/+	+/+/+	+/+/+	+/+/+	+/+/+	+/+/+	-/+/-	+/+/+	+/+/+
b2129	yehX	M	+/+/+	+/+/-	+/+/+	+/+/+	+/+/+	+/+/+	+/+/+	+/+/-	+/+/+	+/+/+	-/+/+	+/+/-	+/+/+	+/+/+	+/+/+	+/+/+	+/+/+	+/+/+	+/+/+	+/+/+	+/+/+	-/+/+	+/+/+	+/+/+	+/+/+	+/+/+	+/+/+	+/+/+	+/+/+	+/+/+	+/+/+	+/+/+	+/-/-	-/+/+	-/+/-	+/+/+	+/+/+	-/+/-	+/+/+	+/+/+	+/+/+	+/+/+	+/+/+	+/+/+	-/+/-	+/+/+	+/+/+
b2421	cysM	M	+/+/+	+/+/-	+/+/+	+/+/+	+/+/+	+/+/+	+/+/+	+/+/-	+/+/+	+/+/+	-/+/+	+/+/-	+/+/+	+/+/+	+/+/+	+/+/+	+/+/+	+/+/+	+/+/+	+/+/+	+/+/+	-/+/+	+/+/+	+/+/+	+/+/+	+/+/+	+/+/+	+/+/+	+/+/+	+/+/+	+/+/+	+/+/+	+/-/-	+/+/+	-/+/-	+/+/+	+/+/+	-/+/-	+/+/+	+/+/+	+/+/+	+/+/+	+/+/+	+/+/+	-/+/-	+/+/+	+/+/+
b2458	eutD	M	+/+/+	+/+/-	+/+/+	+/+/+	+/+/+	+/+/+	+/+/+	+/+/-	+/+/+	+/+/+	-/+/+	+/+/-	+/+/+	+/+/+	+/+/+	+/+/+	+/+/+	+/+/+	+/+/+	+/+/+	+/+/+	-/+/+	+/+/+	+/+/+	+/+/+	+/+/+	+/+/+	+/+/+	+/+/+	+/+/+	+/+/+	+/+/+	+/-/-	+/+/+	-/+/-	+/+/+	+/+/+	-/+/-	+/+/+	+/+/+	+/+/+	+/+/+	+/+/+	+/+/+	-/+/-	+/+/+	+/+/+
b2553	glnB	R	+/+/+	+/+/-	+/+/+	+/+/+	+/+/+	+/+/+	+/+/+	+/+/-	+/+/+	+/+/+	-/+/+	+/+/-	+/+/+	+/+/+	+/+/+	+/+/+	+/+/+	+/+/+	+/+/+	+/+/+	+/+/+	-/+/+	+/+/+	+/+/+	+/+/+	+/+/+	+/+/+	+/+/+	+/+/+	+/+/+	+/+/+	+/+/+	+/-/-	-/+/+	-/+/-	+/+/+	+/+/+	-/+/-	+/+/+	+/+/+	+/+/+	+/+/+	+/+/+	+/+/+	-/+/-	+/+/+	+/+/+
b2574	nadB	M	+/-/-	+/-/-	+/-/-	+/-/-	+/-/-	+/-/-	+/-/-	+/-/-	+/-/-	+/-/-	-/-/-	+/-/-	+/-/-	+/-/-	+/-/-	+/-/-	+/-/-	+/-/-	+/-/-	+/-/-	+/-/-	-/-/-	+/-/-	+/-/-	+/-/-	+/-/-	+/-/-	+/-/-	+/-/-	+/-/-	+/-/-	+/-/-	+/-/-	+/-/-	-/-/-	+/-/-	+/-/-	-/-/-	+/-/-	+/-/-	+/-/-	+/-/-	+/-/-	+/-/-	-/-/-	+/-/-	+/-/-
b2587	kgtP	M	+/+/+	+/+/-	+/+/+	+/+/+	+/+/+	+/+/+	-/+/+	+/+/-	+/+/+	+/+/+	-/+/+	+/+/-	+/+/+	+/+/+	+/+/+	+/+/+	+/+/+	+/+/+	+/+/+	+/+/+	+/+/+	-/+/+	+/+/+	+/+/+	+/+/+	+/+/+	+/+/+	+/+/+	+/+/+	+/+/+	+/+/+	+/+/+	+/-/-	-/+/+	-/+/-	+/-/-	+/+/+	-/+/-	+/+/+	+/+/+	+/+/+	+/+/+	+/+/+	+/+/+	-/+/-	+/+/+	+/+/+
b2661	gabD	M	+/+/+	+/+/-	+/+/+	+/+/+	+/+/+	+/+/+	+/+/+	+/+/-	+/+/+	+/+/+	-/+/+	+/+/-	+/+/+	+/+/+	+/+/+	+/+/+	+/+/+	+/+/+	+/+/+	+/+/+	+/+/+	+/+/+	+/+/+	+/+/+	+/+/+	+/+/+	+/+/+	+/+/+	+/+/+	+/+/+	+/+/+	+/+/+	+/-/-	+/+/+	-/+/-	+/+/+	+/+/+	-/+/-	+/+/+	+/+/+	+/+/+	+/+/+	+/+/+	+/+/+	-/+/-	+/+/+	+/+/+
b2662	gabT	M	+/+/+	+/+/-	+/+/+	+/+/+	+/+/+	+/+/+	+/+/+	+/+/-	+/+/+	+/+/+	-/+/+	+/+/-	+/+/+	+/+/+	+/+/+	+/+/+	+/+/+	+/+/+	+/+/+	+/+/+	+/+/+	-/+/+	+/+/+	+/+/+	+/+/+	+/+/+	+/+/+	+/+/+	+/+/+	+/+/+	+/+/+	+/+/+	+/-/-	+/+/+	-/+/-	+/+/+	+/+/+	-/+/-	+/+/+	+/+/+	+/+/+	+/+/+	+/+/+	+/+/+	-/+/-	+/+/+	+/+/+
b2675	nrdE	M	+/+/+	+/+/-	+/+/+	+/+/+	+/+/+	+/+/+	+/+/+	+/+/-	+/+/+	+/+/+	-/+/+	+/+/-	+/+/+	+/+/+	+/+/+	+/+/+	+/+/+	+/+/+	+/+/+	+/+/+	+/+/+	-/+/+	+/+/+	+/+/+	+/+/+	+/+/+	+/+/+	+/+/+	+/+/+	+/+/+	+/+/+	+/+/+	+/-/-	+/+/+	-/+/-	+/+/+	+/+/+	-/+/-	+/+/+	+/+/+	+/+/+	+/+/+	+/+/+	+/+/+	-/+/-	+/+/+	+/+/+
b2678	proW	M	+/+/+	+/+/-	+/+/+	+/+/+	+/+/+	+/+/+	+/+/+	+/+/-	+/+/+	+/+/+	-/+/+	+/+/-	+/+/+	+/+/+	+/+/+	+/+/+	+/+/+	+/+/+	+/+/+	+/+/+	+/+/+	-/+/+	+/+/+	+/+/+	+/+/+	+/+/+	+/+/+	+/+/+	+/+/+	+/+/+	+/+/+	+/+/+	+/-/-	+/+/+	-/+/-	+/+/+	+/+/+	-/+/-	+/+/+	+/+/+	+/+/+	+/+/+	+/+/+	+/+/+	-/+/-	+/+/+	+/+/+
b2690	yqaB	M	+/+/+	+/+/-	+/+/+	+/+/+	+/+/+	+/+/+	+/+/+	+/+/-	+/+/+	+/+/+	+/+/+	+/+/-	+/+/+	+/+/+	+/+/+	+/+/+	+/+/+	+/+/+	+/+/+	+/+/+	+/+/+	+/+/+	+/+/+	+/+/+	+/+/+	+/+/+	+/+/+	+/+/+	+/+/+	+/+/+	+/+/+	+/+/+	+/-/-	+/+/+	-/+/-	+/+/+	+/+/+	+/+/-	+/+/+	+/+/+	+/+/+	+/+/+	+/+/+	+/+/+	+/+/-	+/+/+	+/+/+
b2703	srlE	M	+/+/+	+/+/-	+/+/+	+/+/+	+/+/+	+/+/+	+/+/+	+/+/-	+/+/+	+/+/+	-/+/+	+/+/-	-/-/-	+/+/+	+/+/+	+/+/+	+/+/+	+/+/+	+/+/+	+/+/+	+/+/+	-/+/+	+/+/+	+/+/+	+/+/+	+/+/+	+/+/+	+/+/+	+/+/+	+/+/+	+/+/+	+/+/+	+/-/-	+/+/+	-/+/-	+/+/+	+/+/+	-/+/-	+/+/+	+/+/+	+/+/+	+/+/+	+/+/+	+/+/+	-/+/-	+/+/+	+/+/+
b2719	hycG	M	+/+/+	+/+/-	+/+/+	+/+/+	+/+/+	+/+/+	+/+/+	+/+/-	+/+/+	+/+/+	-/+/+	+/+/-	+/+/+	+/+/+	+/+/+	+/+/+	+/+/+	+/+/+	+/+/+	+/+/+	+/+/+	-/+/+	+/+/+	+/+/+	+/+/+	+/+/+	+/+/+	+/+/+	+/+/+	+/+/+	+/+/+	+/+/+	+/-/-	+/+/+	-/+/-	+/+/+	+/+/+	-/+/-	+/+/+	+/+/+	+/+/+	+/+/+	+/+/+	+/+/+	-/+/-	+/+/+	+/+/+
b2720	hycF	M	+/+/+	+/+/-	+/+/+	+/+/+	+/+/+	+/+/+	+/+/+	+/+/-	+/+/+	+/+/+	-/+/+	+/+/-	+/+/+	+/+/+	+/+/+	+/+/+	+/+/+	+/+/+	+/+/+	+/+/+	+/+/+	-/+/+	+/+/+	+/+/+	+/+/+	+/+/+	+/+/+	+/+/+	+/+/+	+/+/+	+/+/+	+/+/+	+/-/-	+/+/+	-/+/-	+/+/+	+/+/+	-/+/-	+/+/+	+/+/+	+/+/+	+/+/+	+/+/+	+/+/+	-/+/-	+/+/+	+/+/+
b2721	hycE	M	+/+/+	+/+/-	+/+/+	+/+/+	+/+/+	+/+/+	+/+/+	+/+/-	+/+/+	+/+/+	-/+/+	+/+/-	+/+/+	+/+/+	+/+/+	+/+/+	+/+/+	+/+/+	+/+/+	+/+/+	+/+/+	-/+/+	+/+/+	+/+/+	+/+/+	+/+/+	+/+/+	+/+/+	+/+/+	+/+/+	+/+/+	+/+/+	+/-/-	+/+/+	-/+/-	+/+/+	+/+/+	-/+/-	+/+/+	+/+/+	+/+/+	+/+/+	+/+/+	+/+/+	-/+/-	+/+/+	+/+/+
b2722	hycD	M	+/+/+	+/+/-	+/+/+	+/+/+	+/+/+	+/+/+	+/+/+	+/+/-	+/+/+	+/+/+	-/+/+	+/+/-	+/+/+	+/+/+	+/+/+	+/+/+	+/+/+	+/+/+	+/+/+	+/+/+	+/+/+	-/+/+	+/+/+	+/+/+	+/+/+	+/+/+	+/+/+	+/+/+	+/+/+	+/+/+	+/+/+	+/+/+	+/-/-	+/+/+	-/+/-	+/+/+	+/+/+	-/+/-	+/+/+	+/+/+	+/+/+	+/+/+	+/+/+	+/+/+	-/+/-	+/+/+	+/+/+
b2724	hycB	M	+/+/+	+/+/-	+/+/+	+/+/+	+/+/+	+/+/+	+/+/+	+/+/-	+/+/+	+/+/+	-/+/+	+/+/-	+/+/+	+/+/+	+/+/+	+/+/+	+/+/+	+/+/+	+/+/+	+/+/+	+/+/+	-/+/+	+/+/+	+/+/+	+/+/+	+/+/+	+/+/+	+/+/+	+/+/+	+/+/+	+/+/+	+/+/+	+/-/-	+/+/+	-/+/-	+/+/+	+/+/+	-/+/-	+/+/+	+/+/+	+/+/+	+/+/+	+/+/+	+/+/+	-/+/-	+/+/+	+/+/+
b2731	fhlA	R	+/+/+	+/+/-	+/+/+	+/+/+	+/+/+	+/+/+	+/+/+	+/+/-	+/+/+	+/+/+	-/+/+	+/+/-	+/+/+	+/+/+	+/+/+	+/+/+	+/+/+	+/+/+	+/+/+	+/+/+	+/+/+	-/+/+	+/+/+	+/+/+	+/+/+	+/+/+	+/+/+	+/+/+	+/+/+	+/+/+	+/+/+	+/+/+	+/-/-	+/+/+	-/+/-	+/+/+	+/+/+	-/+/-	+/+/+	+/+/+	+/+/+	+/+/+	+/+/+	+/+/+	-/+/-	+/+/+	+/+/+
b2738	ygbL	M	+/+/+	+/+/-	+/+/+	+/+/+	+/+/+	+/+/+	+/+/+	+/+/-	+/+/+	+/+/+	-/+/+	+/+/-	+/+/+	+/+/+	+/+/+	+/+/+	+/+/+	+/+/+	+/+/+	+/+/+	+/+/+	+/+/+	+/+/+	+/+/+	+/+/+	+/+/+	+/+/+	+/+/+	+/+/+	+/+/+	+/+/+	+/+/+	+/-/-	+/+/+	-/+/-	+/+/+	+/+/+	+/+/-	+/+/+	+/+/+	+/+/+	+/+/+	+/+/+	+/+/+	+/+/-	+/+/+	+/+/+
b2750	cysC	M	+/-/-	+/-/-	+/-/-	+/-/-	+/-/-	+/-/-	+/-/-	+/-/-	+/-/-	+/-/-	-/-/-	+/-/-	+/-/-	+/-/-	+/-/-	+/-/-	+/-/-	+/-/-	+/-/-	+/-/-	+/-/-	-/-/-	+/-/-	+/-/-	+/-/-	-/-/-	+/-/-	+/-/-	+/-/-	+/-/-	+/-/-	+/-/-	+/-/-	+/-/-	-/-/-	+/-/-	+/-/-	-/-/-	+/-/-	+/-/-	+/-/-	+/-/-	+/-/-	+/-/-	-/-/-	+/-/-	+/-/-
b2789	gudP	M	+/+/+	+/+/-	+/+/+	+/+/+	+/+/+	+/+/+	+/+/+	+/+/-	+/+/+	+/+/+	+/+/+	+/+/-	+/+/+	+/+/+	+/+/+	+/+/+	+/+/+	+/+/+	+/+/+	+/+/+	+/+/+	+/+/+	+/+/+	+/+/+	+/+/+	+/+/+	+/+/+	+/+/+	+/+/+	+/+/+	+/+/+	+/+/+	+/-/-	+/+/+	-/+/-	+/+/+	+/+/+	+/+/-	+/+/+	+/+/+	+/+/+	+/+/+	+/+/+	+/+/+	+/+/-	+/+/+	+/+/+
b2796	sdaC	M	+/+/+	+/+/-	+/+/+	+/+/+	+/+/+	+/+/+	+/+/+	+/+/-	+/+/+	+/+/+	-/+/+	+/+/-	+/+/+	+/+/+	+/+/+	+/+/+	+/+/+	+/+/+	+/+/+	+/+/+	+/+/+	-/+/+	+/+/+	+/+/+	+/+/+	+/+/+	+/+/+	+/+/+	+/+/+	+/+/+	+/+/+	+/+/+	+/-/-	-/+/+	-/+/-	+/+/+	+/+/+	-/+/-	+/+/+	+/+/+	+/+/+	+/+/+	+/+/+	+/+/+	-/+/-	+/+/+	+/+/+
b2797	sdaB	M	+/+/-	+/+/-	+/+/-	+/+/-	+/+/-	+/+/-	+/+/-	+/+/-	+/+/-	+/+/-	-/+/-	+/+/-	+/+/-	+/+/-	+/+/-	+/+/-	+/+/-	+/+/-	+/+/-	+/+/-	+/+/-	-/+/-	+/+/-	+/+/-	+/+/-	+/+/-	+/+/-	+/+/-	+/+/-	+/+/-	+/+/-	+/+/-	+/-/-	+/+/-	-/+/-	+/+/-	+/+/-	-/+/-	+/+/-	+/+/-	+/+/-	+/+/-	+/+/-	+/+/-	-/+/-	+/+/-	+/+/-
b2799	fucO	M	+/+/+	+/+/-	+/+/+	+/+/+	+/+/+	+/+/+	+/+/+	+/+/-	+/+/+	+/+/+	-/+/+	+/+/-	+/+/+	+/+/+	-/+/+	+/+/+	+/+/+	+/+/+	+/+/+	+/+/+	+/+/+	-/+/+	+/+/+	+/+/+	+/+/+	+/+/+	+/+/+	+/+/+	+/+/+	+/+/+	+/+/+	+/+/+	+/-/-	-/+/+	-/-/-	+/+/+	+/+/+	-/+/-	+/+/+	+/+/+	+/+/+	+/+/+	+/+/+	+/+/+	-/+/-	+/+/+	+/+/+
b2802	fucI	M	+/+/+	+/+/-	+/+/+	+/+/+	+/+/+	+/+/+	+/+/+	+/+/-	+/+/+	+/+/+	-/+/+	+/+/-	+/+/+	+/+/+	+/-/-	+/+/+	+/+/+	+/+/+	+/+/+	+/+/+	+/+/+	-/+/+	+/+/+	+/+/+	+/+/+	+/+/+	+/+/+	+/+/+	+/+/+	+/+/+	+/+/+	+/+/+	+/-/-	+/+/+	-/+/-	+/+/+	+/+/+	-/+/-	+/+/+	+/+/+	+/+/+	+/+/+	+/+/+	+/+/+	-/+/-	+/+/+	+/+/+
b2808	gcvA	R	+/+/+	+/+/-	+/+/+	+/+/+	+/+/+	+/+/+	-/+/+	+/+/-	+/+/+	+/+/+	-/+/+	+/+/-	+/+/+	+/+/+	+/+/+	+/+/+	+/+/+	+/+/+	+/+/+	+/+/+	+/+/+	-/+/+	+/+/+	+/+/+	+/+/+	+/+/+	+/+/+	+/+/+	+/+/+	+/+/+	+/+/+	+/+/+	+/-/-	-/+/+	-/+/-	+/+/+	+/+/+	-/+/-	+/+/+	-/+/+	+/+/+	+/+/+	+/+/+	-/+/+	-/+/-	+/+/+	+/+/+
b2818	argA	M	+/-/-	+/-/-	+/-/-	+/-/-	+/-/-	+/-/-	+/-/-	+/-/-	+/-/-	+/-/-	-/-/-	+/-/-	+/-/-	+/-/-	+/-/-	+/-/-	+/-/-	+/-/-	+/-/-	+/-/-	+/-/-	-/-/-	+/-/-	+/-/-	+/-/-	+/-/-	+/-/-	+/-/-	+/-/-	+/-/-	+/-/-	+/-/-	+/-/-	+/-/-	-/-/-	+/-/-	+/-/-	-/-/-	+/-/-	+/-/-	+/-/-	+/-/-	+/-/-	+/-/-	-/-/-	+/-/-	+/-/-
b2836	aas	M	+/+/+	+/+/-	+/+/+	+/+/+	+/+/+	+/+/+	+/+/+	+/+/-	+/+/+	+/+/+	-/+/+	+/+/-	+/+/+	+/+/+	+/+/+	+/+/+	+/+/+	+/+/+	+/+/+	+/+/+	+/+/+	-/+/+	+/+/+	+/+/+	+/+/+	+/+/+	+/+/+	+/+/+	+/+/+	+/+/+	+/+/+	+/+/+	+/-/-	-/+/+	-/+/-	+/+/+	+/+/+	-/+/-	+/+/+	+/+/+	+/+/+	+/+/+	+/+/+	+/+/+	-/+/-	+/+/+	+/+/+
b2841	araE	M	+/+/+	+/+/-	+/+/+	+/+/+	+/+/+	+/+/+	+/+/+	+/+/-	+/+/+	+/+/+	-/+/+	+/+/-	+/+/+	+/+/+	+/+/+	+/+/+	+/+/+	+/+/+	+/+/+	+/+/+	+/+/+	-/+/+	+/+/+	+/+/+	+/+/+	+/+/+	+/+/+	+/+/+	+/+/+	+/+/+	+/+/+	+/+/+	+/-/-	-/+/+	-/+/-	+/+/+	+/+/+	-/+/-	+/+/+	+/+/+	+/+/+	+/+/+	+/+/+	+/+/+	-/+/-	+/+/+	+/+/+
b2874	yqeA	M	+/+/+	+/+/-	+/+/+	+/+/+	+/+/+	+/+/+	+/+/+	+/+/-	+/+/+	+/+/+	+/+/+	+/+/-	+/+/+	+/+/+	+/+/+	+/+/+	+/+/+	+/+/+	+/+/+	+/+/+	+/+/+	+/+/+	+/+/+	+/+/+	+/+/+	+/+/+	+/+/+	+/+/+	+/+/+	+/+/+	+/+/+	+/+/+	+/-/-	+/+/+	-/+/-	+/+/+	+/+/+	-/+/-	+/+/+	+/+/+	+/+/+	+/+/+	+/+/+	+/+/+	-/+/-	+/+/+	+/+/+
b2903	gcvP	M	+/+/+	+/+/-	+/+/+	+/+/+	+/+/+	+/+/+	+/+/+	+/+/-	+/+/+	+/+/+	-/+/+	+/+/-	+/+/+	+/+/+	+/+/+	+/+/+	+/+/+	+/+/+	+/+/+	+/+/+	+/+/+	-/+/+	+/+/+	+/+/+	+/+/+	+/+/+	+/+/+	+/+/+	+/+/+	+/+/+	+/+/+	+/+/+	+/-/-	+/+/+	-/+/-	+/+/+	+/+/+	-/+/-	+/+/+	+/+/+	+/+/+	+/+/+	+/+/+	+/+/+	-/+/-	+/+/+	+/+/+
b2904	gcvH	M	+/+/+	+/+/-	+/+/+	+/+/+	+/+/+	+/+/+	+/+/+	+/+/-	+/+/+	+/+/+	-/+/+	+/+/-	+/+/+	+/+/+	+/+/+	+/+/+	+/+/+	+/+/+	+/+/+	+/+/+	+/+/+	-/+/+	+/+/+	+/+/+	+/+/+	+/+/+	+/+/+	+/+/+	+/+/+	+/+/+	+/+/+	+/+/+	+/-/-	-/+/+	-/+/-	+/+/+	+/+/+	-/+/-	+/+/+	+/+/+	+/+/+	+/+/+	+/+/+	+/+/+	-/+/-	+/+/+	+/+/+
b2913	serA	M	+/-/-	-/-/-	+/-/-	+/-/-	+/-/-	+/-/-	-/-/-	+/-/-	+/-/-	-/-/-	-/-/-	+/-/-	+/-/-	+/-/-	+/-/-	+/-/-	+/-/-	+/-/-	+/-/-	+/-/-	+/-/-	-/-/-	-/-/-	-/-/-	+/-/-	+/-/-	+/-/-	+/-/-	+/-/-	-/-/-	+/-/-	+/-/-	-/-/-	-/-/-	-/-/-	+/-/-	+/-/-	-/-/-	-/-/-	-/-/-	+/-/-	+/-/-	+/-/-	+/-/-	-/-/-	-/-/-	+/-/-
b2917	scpA	M	+/+/+	+/+/-	+/+/+	+/+/+	+/+/+	+/+/+	-/+/+	+/+/-	+/+/+	+/+/+	-/+/+	+/+/-	+/+/+	+/+/+	+/+/+	+/+/+	+/+/+	+/+/+	+/+/+	+/+/+	+/+/+	-/+/+	+/+/+	+/+/+	+/+/+	+/+/+	+/+/+	+/+/+	+/+/+	+/+/+	+/+/+	+/+/+	+/-/-	+/+/+	-/+/-	+/+/+	+/+/+	-/+/-	+/+/+	+/+/+	+/+/+	+/+/+	+/+/+	+/+/+	-/+/-	+/+/+	+/+/+
b2920	scpC	M	+/+/+	+/+/-	+/+/+	+/+/+	+/+/+	+/+/+	+/+/+	+/+/-	+/+/+	+/+/+	+/+/+	+/+/-	+/+/+	+/+/+	+/+/+	+/+/+	+/+/+	+/+/+	+/+/+	+/+/+	+/+/+	-/+/+	+/+/+	+/+/+	+/+/+	+/+/+	+/+/+	+/+/+	+/+/+	+/+/+	+/+/+	+/+/+	+/-/-	+/+/+	-/+/-	+/+/+	+/+/+	-/+/-	+/+/+	+/+/+	+/+/+	+/+/+	+/+/+	+/+/+	-/+/-	+/+/+	+/+/+
b2926	pgk	M	+/+/+	+/+/-	+/-/-	+/-/-	+/+/+	+/-/-	+/-/-	+/-/-	+/+/+	+/+/+	-/+/+	+/-/-	+/+/+	+/+/+	+/+/+	+/+/+	+/+/+	+/+/+	+/+/+	+/-/-	+/+/+	-/-/-	+/+/+	+/+/+	+/-/-	+/+/+	+/+/+	+/+/+	+/-/-	+/+/+	+/+/+	+/+/+	+/-/-	+/-/-	-/-/-	+/-/-	+/+/+	-/+/-	+/+/+	+/-/-	+/+/+	+/+/+	+/+/+	+/-/-	-/-/-	+/-/-	+/-/-
b2927	epd	M	+/+/+	+/+/-	+/+/+	+/+/+	+/+/+	+/+/+	+/+/+	+/+/-	+/+/+	+/+/+	-/+/+	+/+/-	+/+/+	+/+/+	+/+/+	+/+/+	+/+/+	+/+/+	+/+/+	+/+/+	+/+/+	-/+/+	+/+/+	+/+/+	+/+/+	+/+/+	+/+/+	+/+/+	+/+/+	+/+/+	+/+/+	+/+/+	+/-/-	+/+/+	-/+/-	+/+/+	+/+/+	-/+/-	+/+/+	+/+/+	+/+/+	+/+/+	+/+/+	+/+/+	-/+/-	+/+/+	+/+/+
b2935	tktA	M	+/+/+	+/+/-	+/+/+	+/+/+	+/+/+	+/+/+	+/+/+	+/+/-	+/+/+	+/+/+	-/+/+	+/+/-	+/+/+	+/+/+	+/+/+	+/+/+	+/+/+	+/+/+	+/+/+	+/+/+	+/+/+	-/+/+	+/+/+	+/+/+	+/+/+	+/+/+	+/+/+	+/+/+	+/+/+	+/+/+	+/+/+	+/+/+	+/-/-	+/+/+	-/+/-	+/+/+	+/+/+	-/+/-	+/+/+	+/+/+	+/+/+	+/+/+	+/+/+	+/+/+	-/+/-	+/+/+	+/+/+
b2937	speB	M	+/+/+	+/+/-	+/+/+	+/+/+	+/+/+	+/+/+	+/+/+	+/+/-	+/+/+	+/+/+	-/+/+	+/+/-	+/+/+	+/+/+	+/+/+	+/+/+	+/+/+	+/+/+	+/+/+	+/+/+	+/+/+	-/+/+	+/+/+	+/+/+	+/+/+	+/+/+	+/+/+	+/+/+	+/+/+	+/+/+	+/+/+	+/+/+	+/-/-	+/+/+	-/+/-	+/+/+	+/+/+	-/+/-	+/+/+	+/+/+	+/+/+	+/+/+	+/+/+	+/+/+	-/+/-	+/+/+	+/+/+
b2938	speA	M	+/+/+	+/+/-	+/+/+	+/+/+	+/+/+	+/+/+	+/+/+	+/+/-	+/+/+	+/+/+	-/+/+	+/+/-	+/+/+	+/+/+	+/+/+	+/+/+	+/+/+	+/+/+	+/+/+	+/+/+	+/+/+	+/+/+	+/+/+	+/+/+	+/+/+	+/+/+	+/+/+	+/+/+	+/+/+	+/+/+	+/+/+	+/+/+	+/-/-	+/+/+	-/+/-	+/+/+	+/+/+	-/+/-	+/+/+	+/+/+	+/+/+	+/+/+	+/+/+	+/+/+	-/+/-	+/+/+	+/+/+
b2943	galP	M	+/+/+	+/+/-	+/+/+	+/+/+	+/+/-	+/+/+	+/+/+	+/+/-	+/+/+	+/+/+	-/+/+	+/+/-	+/+/+	+/+/+	+/+/+	+/+/+	+/+/+	+/+/+	+/+/+	+/+/+	+/+/+	-/+/+	+/+/+	+/+/+	+/+/+	+/+/+	+/+/+	+/+/+	+/+/+	+/+/+	+/+/+	+/+/+	+/-/-	+/+/+	-/+/-	+/+/+	+/+/+	-/+/-	+/+/+	+/+/+	+/+/+	+/+/+	+/+/+	+/+/+	-/+/-	+/+/+	+/+/+
b2947	gshB	M	+/+/+	+/+/-	+/+/+	+/+/+	+/+/+	+/+/+	+/+/+	+/+/-	+/+/+	+/+/+	-/+/+	+/+/-	+/+/+	+/+/+	+/+/+	+/+/+	+/+/+	+/+/+	+/+/+	+/+/+	+/+/+	-/+/+	+/+/+	+/+/+	+/+/+	+/+/+	+/+/+	+/+/+	+/+/+	+/+/+	+/+/+	+/+/+	+/-/-	-/+/+	-/+/-	+/+/+	+/+/+	-/+/-	+/+/+	+/+/+	+/+/+	+/+/+	+/+/+	+/+/+	-/+/-	+/+/+	+/+/+
b2964	nupG	M	+/+/+	+/+/-	+/+/+	+/+/+	+/+/+	+/+/+	+/+/+	+/+/-	+/+/+	+/+/+	+/+/+	+/+/-	+/+/+	+/+/+	+/+/+	+/+/+	+/+/+	+/+/+	+/+/+	+/+/+	+/+/+	+/+/+	+/+/+	+/+/+	+/+/+	+/+/+	+/+/+	+/+/+	+/+/+	+/+/+	+/+/+	+/+/+	+/-/-	+/+/+	-/+/-	+/+/+	+/+/+	+/+/-	+/+/+	+/+/+	+/+/+	+/+/+	+/+/+	+/+/+	-/+/-	+/+/+	+/+/+
b2965	speC	M	+/+/+	+/+/-	+/+/+	+/+/+	+/+/+	+/+/+	+/+/+	+/+/-	+/+/+	+/+/+	-/+/+	+/+/-	+/+/+	+/+/+	+/+/+	+/+/+	+/+/+	+/+/+	+/+/+	+/+/+	+/+/+	-/+/+	+/+/+	+/+/+	+/+/+	+/+/+	+/+/+	+/+/+	+/+/+	+/+/+	+/+/+	+/+/+	+/-/-	+/+/+	-/+/-	+/+/+	+/+/+	-/+/-	+/+/+	+/+/+	+/+/+	+/+/+	+/+/+	+/+/+	-/+/-	+/+/+	+/+/+
b2978	glcEF	M	+/+/+	+/+/-	+/+/+	+/+/+	+/+/+	+/+/+	+/+/+	+/+/-	+/+/+	+/+/+	-/+/+	+/+/-	+/+/+	+/+/+	+/+/+	+/+/+	+/+/+	+/+/+	+/+/+	+/+/+	+/+/+	-/+/+	+/+/+	+/+/+	+/+/+	+/+/+	+/+/+	+/+/+	+/+/+	+/+/+	+/+/+	+/+/+	+/-/-	+/+/+	-/+/-	+/+/+	+/+/+	-/+/-	+/+/+	+/+/+	+/+/+	+/+/+	+/+/+	+/+/+	-/+/-	+/+/+	+/+/+
b2979	glcD	M	+/+/+	+/+/-	+/+/+	+/+/+	+/+/+	+/+/+	+/+/+	+/+/-	+/+/+	+/+/+	-/+/+	+/+/-	+/+/+	+/+/+	+/+/+	+/+/+	+/+/+	+/+/+	+/+/+	+/+/+	+/+/+	-/+/+	+/+/+	+/+/+	+/+/+	+/+/+	+/+/+	+/+/+	+/+/+	+/+/+	+/+/+	+/+/+	+/-/-	+/+/+	-/+/-	+/+/+	+/+/+	-/+/-	+/+/+	+/+/+	+/+/+	+/+/+	+/+/+	+/+/+	-/+/-	+/+/+	+/+/+
b2994	hybC	M	+/+/+	+/+/-	+/+/+	+/+/+	+/+/+	+/+/+	+/+/+	+/+/-	+/+/+	+/+/+	+/+/+	+/+/-	+/+/+	+/+/+	+/+/+	+/+/+	+/+/+	+/+/+	+/+/+	+/+/+	+/+/+	-/+/+	+/+/+	+/+/+	+/+/+	+/+/+	+/+/+	+/+/+	+/+/+	+/+/+	+/+/+	+/+/+	+/-/-	+/+/+	-/+/-	+/+/+	+/+/+	-/+/-	+/+/+	+/+/+	+/+/+	+/+/+	+/+/+	+/+/+	-/+/-	+/+/+	+/+/+
b3063	ygjE	M	+/+/+	+/+/-	+/+/+	+/+/+	+/+/+	+/+/+	+/+/+	+/+/-	+/+/+	+/+/+	-/+/+	+/+/-	+/+/+	+/+/+	+/+/+	+/+/+	+/+/+	+/+/+	+/+/+	+/+/+	+/+/+	+/+/+	+/+/+	+/+/+	+/+/+	+/+/+	+/+/+	+/+/+	+/+/+	+/+/+	+/+/+	+/+/+	+/-/-	+/+/+	-/+/-	+/+/+	+/+/+	-/+/-	+/+/+	+/+/+	+/+/+	+/+/+	+/+/+	+/+/+	-/+/-	+/+/+	+/+/+
b3073	ygjG	M	+/+/+	+/+/-	+/+/+	+/+/+	+/+/+	+/+/+	+/+/+	+/+/-	+/+/+	+/+/+	-/+/+	+/+/-	+/+/+	+/+/+	+/+/+	+/+/+	+/+/+	+/+/+	+/+/+	+/+/+	+/+/+	+/+/+	+/+/+	+/+/+	+/+/+	+/+/+	+/+/+	+/+/+	+/+/+	+/+/+	+/+/+	+/+/+	+/-/-	+/+/+	-/+/-	+/+/+	+/+/+	-/+/-	+/+/+	+/+/+	+/+/+	+/+/+	+/+/+	+/+/+	-/+/-	+/+/+	+/+/+
b3089	sstT	M	+/+/+	+/+/-	+/+/+	+/+/+	+/+/+	+/+/+	+/+/+	+/+/-	+/+/+	+/+/+	-/+/+	+/+/-	+/+/+	+/+/+	+/+/+	+/+/+	+/+/+	+/+/+	+/+/+	+/+/+	+/+/+	+/+/+	+/+/+	+/+/+	+/+/+	+/+/+	+/+/+	+/+/+	+/+/+	+/+/+	+/+/+	+/+/+	+/-/-	+/+/+	-/+/-	+/+/+	+/+/+	-/+/-	+/+/+	+/+/+	+/+/+	+/+/+	+/+/+	+/+/+	-/+/-	+/+/+	+/+/+
b3125	garR	M	+/+/+	+/+/-	+/+/+	+/+/+	+/+/+	+/+/+	+/+/+	+/+/-	+/+/+	+/+/+	-/+/+	+/+/-	+/+/+	+/+/+	+/+/+	+/+/+	+/+/+	+/+/+	+/+/+	+/+/+	+/+/+	+/+/+	+/+/+	+/+/+	+/+/+	+/+/+	+/+/+	+/+/+	+/+/+	+/+/+	+/+/+	+/+/+	+/-/-	+/+/+	-/+/-	+/+/+	+/+/+	-/+/-	+/+/+	+/+/+	+/+/+	+/+/+	+/+/+	+/+/+	+/+/-	+/+/+	+/+/+
b3128	garD	M	+/+/+	+/+/-	+/+/+	+/+/+	+/+/+	+/+/+	+/+/+	+/+/-	+/+/+	+/+/+	-/+/+	+/+/-	+/+/+	+/+/+	+/+/+	+/+/+	+/+/+	+/+/+	+/+/+	+/+/+	+/+/+	+/+/+	+/+/+	+/+/+	+/+/+	+/+/+	+/+/+	+/+/+	+/+/+	+/+/+	+/+/+	+/+/+	+/-/-	+/+/+	-/+/-	+/+/+	+/+/+	+/+/-	+/+/+	+/+/+	+/+/+	+/+/+	+/+/+	+/+/+	+/+/-	+/+/+	+/-/-
b3380	yhfW	M	+/+/+	+/+/-	+/+/+	+/+/+	+/+/+	+/+/+	+/+/+	+/+/-	+/+/+	+/+/+	-/+/+	+/+/-	+/+/+	+/+/+	+/+/+	+/+/+	+/+/+	+/+/+	+/+/+	+/+/+	+/+/+	-/+/+	+/+/+	+/+/+	+/+/+	+/+/+	+/+/+	+/+/+	+/+/+	+/+/+	+/+/+	+/+/+	+/-/-	+/+/+	-/+/-	+/+/+	+/+/+	-/+/-	+/+/+	+/+/+	+/+/+	+/+/+	+/+/+	+/+/+	-/+/-	+/+/+	+/+/+
b3574	yiaJ	R	+/+/+	+/+/-	+/+/+	+/+/+	+/+/+	+/+/+	-/+/+	+/+/-	+/+/+	+/+/+	-/+/+	+/+/-	+/+/+	+/+/+	+/+/+	+/+/+	+/+/+	+/+/+	+/+/+	+/+/+	+/+/+	-/+/+	+/+/+	+/+/+	+/+/+	+/+/+	+/+/+	+/+/+	+/+/+	+/+/+	+/+/+	+/+/+	+/-/-	-/+/+	-/+/-	+/+/+	+/+/+	-/+/-	+/+/+	+/+/+	+/+/+	+/+/+	+/+/+	+/+/+	-/+/-	+/+/+	+/+/+
b3575	yiaK	M	+/+/+	+/+/-	+/+/+	+/+/+	+/+/+	+/+/+	+/+/+	+/+/-	+/+/+	+/+/+	-/+/+	+/+/-	+/+/+	+/+/+	+/+/+	+/+/+	+/+/+	+/+/+	+/+/+	+/+/+	+/+/+	-/+/+	+/+/+	+/+/+	+/+/+	+/+/+	+/+/+	+/+/+	+/+/+	+/+/+	+/+/+	+/+/+	+/-/-	+/+/+	-/+/-	+/+/+	+/+/+	-/+/-	+/+/+	+/+/+	+/+/+	+/+/+	+/+/+	+/+/+	-/+/-	+/+/+	+/+/+
b3581	sgbH	M	+/+/+	+/+/-	+/+/+	+/+/+	+/+/+	+/+/+	+/+/+	+/+/-	+/+/+	+/+/+	-/+/+	+/+/-	+/+/+	+/+/+	+/+/+	+/+/+	+/+/+	+/+/+	+/+/+	+/+/+	+/+/+	-/+/+	+/+/+	+/+/+	+/+/+	+/+/+	+/+/+	+/+/+	+/+/+	+/+/+	+/+/+	+/+/+	+/-/-	+/+/+	-/+/-	+/+/+	+/+/+	-/+/-	+/+/+	+/+/+	+/+/+	+/+/+	+/+/+	+/+/+	-/+/-	+/+/+	+/+/+
b3583	sgbE	M	+/+/+	+/+/-	+/+/+	+/+/+	+/+/+	+/+/+	+/+/+	+/+/-	+/+/+	+/+/+	-/+/+	+/+/-	+/+/+	+/+/+	+/+/+	+/+/+	+/+/+	+/+/+	+/+/+	+/+/+	+/+/+	-/+/+	+/+/+	+/+/+	+/+/+	+/+/+	+/+/+	+/+/+	+/+/+	+/+/+	+/+/+	+/+/+	+/-/-	-/+/+	-/+/-	+/+/+	+/+/+	-/+/-	+/+/+	+/+/+	+/+/+	+/+/+	+/+/+	+/+/+	-/+/-	+/+/+	+/+/+
b3612	gpmI	M	+/+/+	+/+/-	+/+/+	+/+/+	+/+/+	+/+/+	+/+/+	+/+/-	+/+/+	+/+/+	-/+/+	+/+/-	+/+/+	+/+/+	+/+/+	+/+/+	+/+/+	+/+/+	+/+/+	+/+/+	+/+/+	-/+/+	+/+/+	+/+/+	+/+/+	+/+/+	+/+/+	+/+/+	+/+/+	+/+/+	+/+/+	+/+/+	+/-/-	-/+/+	-/+/-	+/+/+	+/+/+	-/+/-	+/+/+	+/+/+	+/+/+	+/+/+	+/+/+	+/+/+	-/+/-	+/+/+	+/+/+
b3692	dgoAD	M	+/+/+	+/+/-	+/+/+	+/+/+	+/+/+	+/+/+	+/+/+	+/+/-	+/+/+	+/+/+	-/+/+	+/+/-	+/+/+	+/+/+	+/+/+	+/+/+	+/+/+	+/+/+	+/+/+	+/+/+	+/+/+	-/+/+	+/+/+	-/-/-	+/+/+	+/+/+	+/+/+	+/+/+	+/+/+	+/+/+	+/+/+	+/+/+	+/-/-	-/+/+	-/+/-	+/+/+	+/+/+	-/+/-	+/+/+	+/+/+	+/+/+	+/+/+	+/+/+	+/+/+	-/+/-	+/+/+	+/+/+
b4132	cadB	M	+/+/+	+/+/-	+/+/+	+/+/+	+/+/+	+/+/+	+/+/+	+/+/-	+/+/+	+/+/+	-/+/+	+/+/-	+/+/+	+/+/+	+/+/+	+/+/+	+/+/+	+/+/+	+/+/+	+/+/+	+/+/+	-/+/+	+/+/+	+/+/+	+/+/+	+/+/+	+/+/+	+/+/+	+/+/+	+/+/+	+/+/+	+/+/+	+/-/-	+/+/+	-/+/-	+/+/+	+/+/+	-/+/-	+/+/+	+/+/+	+/+/+	+/+/+	+/+/+	+/+/+	-/+/-	+/+/+	+/+/+
b4139	aspA	M	+/+/+	+/+/-	+/+/+	+/+/+	+/+/+	-/+/+	-/+/+	+/+/-	+/+/+	+/+/+	-/+/+	+/+/-	+/+/+	+/+/+	+/+/+	+/+/+	+/+/+	+/+/+	+/+/+	+/+/+	+/+/+	-/+/+	+/+/+	+/+/+	+/+/+	+/+/+	+/+/+	+/+/+	+/+/+	+/+/+	+/+/+	+/+/+	+/-/-	-/+/+	-/+/-	+/+/+	+/+/+	-/+/-	+/+/+	-/+/+	+/+/+	+/+/+	+/+/+	-/+/+	-/+/-	+/+/+	+/+/+
b4152	frdC	M	+/+/+	+/+/-	+/+/+	+/+/+	+/+/+	+/+/+	+/+/+	+/+/-	+/+/+	+/+/+	-/+/+	+/+/-	+/+/+	+/+/+	+/+/+	+/+/+	+/+/+	+/+/+	+/+/+	+/+/+	+/+/+	-/+/+	+/+/+	+/+/+	+/+/+	+/+/+	+/+/+	+/+/+	+/+/+	+/+/+	+/+/+	+/+/+	+/-/-	+/+/+	-/+/-	+/+/+	+/+/+	-/+/-	+/+/+	+/+/+	+/+/+	+/+/+	+/+/+	+/+/+	-/+/-	+/+/+	+/+/+
b4153	frdB	M	+/+/+	+/+/-	+/+/+	+/+/+	+/+/+	+/+/+	+/+/+	+/+/-	+/+/+	+/+/+	-/+/+	+/+/-	+/+/+	+/+/+	+/+/+	+/+/+	+/+/+	+/+/+	+/+/+	+/+/+	+/+/+	-/+/+	+/+/+	+/+/+	+/+/+	+/+/+	+/+/+	+/+/+	+/+/+	+/+/+	+/+/+	+/+/+	+/-/-	+/+/+	-/+/-	+/+/+	+/+/+	-/+/-	+/+/+	+/+/+	+/+/+	+/+/+	+/+/+	+/+/+	-/+/-	+/+/+	+/+/+
b4154	frdA	M	+/+/+	+/+/-	+/+/+	+/+/+	+/+/+	+/+/+	+/+/+	+/+/-	+/+/+	+/+/+	-/+/+	+/+/-	+/+/+	+/+/+	+/+/+	+/+/+	+/+/+	+/+/+	+/+/+	+/+/+	+/+/+	-/+/+	+/+/+	+/+/+	+/+/+	+/+/+	+/+/+	+/+/+	+/+/+	+/+/+	+/+/+	+/+/+	+/-/-	+/+/+	-/+/-	+/+/+	+/+/+	-/+/-	+/+/+	+/+/+	+/+/+	+/+/+	+/+/+	+/+/+	-/+/-	+/+/+	+/+/+
b4198	ulaF	M	+/+/+	+/+/-	+/+/+	+/+/+	+/+/+	+/+/+	+/+/+	+/+/-	+/+/+	+/+/+	-/+/+	+/+/-	+/+/+	+/+/+	+/+/+	+/+/+	+/+/+	+/+/+	+/+/+	+/+/+	+/+/+	-/+/+	+/+/+	+/+/+	+/+/+	+/+/+	+/+/+	+/+/+	+/+/+	+/+/+	+/+/+	+/+/+	+/-/-	+/+/+	-/+/-	+/+/+	+/+/+	-/+/-	+/+/+	+/+/+	+/+/+	+/+/+	+/+/+	+/+/+	-/+/-	+/+/+	+/+/+
b4208	cycA	M	+/+/+	+/+/-	+/+/+	+/+/+	+/+/+	+/+/+	+/+/+	+/-/-	+/+/+	+/+/+	-/+/+	+/-/-	+/+/+	+/+/+	+/+/+	+/+/+	+/+/+	+/+/+	+/+/+	+/+/+	+/+/+	-/+/+	+/+/+	+/+/+	+/+/+	+/+/+	+/+/+	+/+/+	+/+/+	+/+/+	+/+/+	+/+/+	+/-/-	+/+/+	-/+/-	+/+/+	+/+/+	-/+/-	+/+/+	+/+/+	+/+/+	+/+/+	+/+/+	+/+/+	-/+/-	+/+/+	+/+/+
b4240	treB	M	+/+/+	+/+/-	+/+/+	+/+/+	+/+/+	+/+/+	+/+/+	+/+/-	+/+/-	+/+/+	-/+/+	+/+/-	+/+/+	+/+/+	+/+/+	+/+/+	+/+/+	+/+/+	+/+/+	+/+/+	+/+/+	-/+/+	+/+/+	+/+/+	+/+/+	+/+/+	+/+/+	+/+/+	+/+/+	+/+/+	+/+/+	+/+/+	+/-/-	+/+/+	-/+/-	+/+/+	+/+/+	-/+/-	+/+/+	+/+/+	+/+/+	+/+/+	+/+/+	+/+/+	-/+/-	+/+/+	+/+/+
b4244	pyrI	M	+/-/-	+/-/-	+/-/-	+/-/-	+/-/-	+/-/-	+/-/-	+/-/-	+/-/-	+/-/-	-/-/-	+/-/-	+/-/-	+/-/-	+/-/-	+/-/-	+/-/-	+/-/-	+/-/-	+/-/-	+/-/-	-/-/-	+/-/-	+/-/-	+/-/-	+/-/-	+/-/-	+/-/-	+/-/-	+/-/-	+/-/-	+/-/-	+/-/-	+/-/-	-/-/-	+/-/-	+/-/-	-/-/-	+/+/+	+/-/-	+/-/-	+/-/-	+/-/-	+/-/-	-/-/-	+/-/-	+/-/-
b4245	pyrB	M	+/-/-	-/-/-	+/-/-	+/-/-	+/-/-	+/-/-	-/-/-	+/-/-	+/-/-	+/-/-	-/-/-	+/-/-	+/-/-	+/-/-	+/-/-	-/-/-	-/-/-	+/-/-	+/-/-	+/-/-	-/-/-	-/-/-	-/-/-	+/-/-	+/-/-	+/-/-	+/-/-	-/-/-	+/-/-	-/-/-	+/-/-	+/-/-	-/-/-	+/-/-	-/-/-	+/-/-	-/-/-	-/-/-	+/+/+	+/-/-	-/-/-	-/-/-	+/-/-	-/-/-	-/-/-	+/-/-	+/-/-
b4254	argI	M	+/+/+	+/+/-	+/+/+	+/+/+	+/+/+	+/+/+	-/+/+	+/+/-	+/+/+	+/+/+	-/+/+	+/+/-	+/+/+	+/+/+	+/+/+	+/+/+	+/+/+	+/+/+	+/+/+	+/+/+	+/+/+	-/+/+	+/+/+	+/+/+	+/+/+	+/+/+	+/+/+	+/+/+	+/+/+	+/+/+	+/+/+	+/+/+	+/-/-	+/+/+	-/+/-	+/+/+	+/+/+	-/+/-	+/+/+	+/+/+	+/+/+	+/+/+	+/+/+	+/+/+	-/+/-	+/+/+	+/+/+
b4321	gntP	M	-/+/+	-/+/-	-/+/+	-/+/+	+/+/+	-/+/+	-/+/+	-/+/-	-/+/+	-/+/+	-/+/+	-/+/-	+/+/+	+/+/+	-/+/+	-/+/+	-/+/+	-/+/+	-/+/+	-/+/+	-/+/+	+/+/+	-/+/+	-/+/+	-/+/+	-/+/+	+/+/+	+/+/+	-/+/+	+/+/+	-/+/+	-/+/+	-/-/-	-/+/+	-/+/-	-/+/+	-/+/+	-/+/-	-/+/+	-/+/+	+/+/+	-/+/+	+/+/+	+/+/+	-/+/-	-/+/+	-/+/+
b4323	uxuB	M	+/+/+	+/+/-	+/+/+	+/+/+	+/+/+	+/+/+	+/+/+	+/+/-	+/+/+	+/+/+	-/+/+	+/+/-	+/+/+	+/+/+	+/+/+	+/-/-	+/+/+	+/+/+	+/+/+	+/+/+	+/+/+	-/+/+	+/+/+	+/+/+	+/+/+	+/+/+	+/+/+	+/+/+	+/+/+	+/+/+	+/+/+	+/+/+	+/-/-	+/+/+	+/+/-	+/+/+	+/+/+	+/+/-	+/+/+	+/+/+	+/+/+	+/+/+	+/+/+	+/+/+	-/+/-	+/+/+	+/+/+
b4324	uxuR	R	+/+/+	+/+/-	+/+/+	+/+/+	+/+/+	+/+/+	+/+/+	+/+/-	+/+/+	+/+/+	-/+/+	+/+/-	+/+/+	+/+/+	+/+/+	+/+/+	+/+/+	+/+/+	+/+/+	+/+/+	+/+/+	-/+/+	+/+/+	+/+/+	+/+/+	+/+/+	+/+/+	+/+/+	+/+/+	+/+/+	+/+/+	+/+/+	+/-/-	+/+/+	-/+/-	+/+/+	+/+/+	-/+/-	+/+/+	+/+/+	+/+/+	+/+/+	+/+/+	+/+/+	-/+/-	+/+/+	+/+/+
b4384	deoD	M	+/+/+	+/+/-	+/+/+	+/+/+	+/+/+	+/+/+	+/+/+	+/+/-	+/+/+	+/+/+	-/+/+	+/+/-	+/+/+	+/+/+	+/+/+	+/+/+	+/+/+	+/+/+	+/+/+	+/+/+	+/+/+	-/+/+	+/+/+	+/+/+	+/+/+	+/+/+	+/+/+	+/+/+	+/+/+	+/+/+	+/+/+	+/+/+	+/-/-	+/+/+	-/+/-	+/+/+	+/+/+	-/+/-	+/+/+	+/+/+	+/+/+	+/+/+	-/+/+	+/+/+	-/+/-	+/+/+	+/+/+
b4393	trpR	R	+/+/+	+/+/-	+/+/+	+/+/+	+/+/+	+/+/+	+/+/+	+/+/-	+/+/+	+/+/+	-/+/+	+/+/-	+/+/+	+/+/+	+/+/+	+/+/+	+/+/+	+/+/+	+/+/+	+/+/+	+/+/+	-/+/+	+/+/+	+/+/+	+/+/+	+/+/+	+/+/+	+/+/+	+/+/+	+/+/+	+/+/+	+/+/+	+/-/-	+/+/+	-/+/-	+/+/+	+/+/+	-/+/-	+/+/+	+/+/+	+/+/+	+/+/+	+/+/+	+/+/+	-/+/-	+/+/+	+/+/+
b4395	ytjC	M	+/+/+	+/+/-	+/+/+	+/+/+	+/+/+	+/+/+	+/+/+	+/+/-	+/+/+	+/+/+	-/+/+	+/+/-	+/+/+	+/+/+	+/+/+	+/+/+	+/+/+	+/+/+	+/+/+	+/+/+	+/+/+	-/+/+	+/+/+	+/+/+	+/+/+	+/+/+	+/+/+	+/+/+	+/+/+	+/+/+	+/+/+	+/+/+	+/-/-	+/+/+	-/+/-	+/+/+	+/+/+	-/+/-	+/+/+	+/+/+	+/+/+	+/+/+	+/+/+	+/+/+	-/+/-	+/+/+	+/+/+
b4396	rob	R	+/+/+	+/+/-	+/+/+	+/+/+	+/+/+	+/+/+	+/+/+	+/+/-	+/+/+	+/+/+	-/+/+	+/+/-	+/+/+	+/+/+	+/+/+	+/+/+	+/+/+	+/+/+	+/+/+	+/+/+	+/+/+	-/+/+	+/+/+	+/+/+	+/+/+	+/+/+	+/+/+	+/+/+	+/+/+	+/+/+	+/+/+	+/+/+	+/-/-	+/+/+	-/+/-	+/+/+	+/+/+	-/+/-	+/+/+	+/+/+	+/+/+	+/+/+	+/+/+	+/+/+	-/+/-	+/+/+	+/+/+
Ito dataset			Media
			C-source
Mutant			acgam	fru	fuc-L	gal	malt	mnl	man	sbt-D	tre	glc	g6p	glyc	glyc3p	galctn-D	galur	glcn	glcur	ac	akg	lac-L;lac-D	succ	ala-L	ala-L;gly	asn-L	asp-L	gly;asp-L	ser-D	ins	uri	thymd
b0080	fruR	R	+/+/-	+/+/+	+/+/+	+/+/+	+/+/+	+/+/+	+/+/+	+/+/+	+/+/+	+/+/+	+/+/+	+/+/+	-/+/+	+/+/+	+/+/+	+/+/+	+/+/+	-/+/+	-/+/+	-/+/+	-/+/+	-/+/+	-/+/+	-/+/+	-/+/+	+/+/+	-/+/-	+/+/+	+/+/+	+/-/-
b0113	pdhR	R	-/+/-	+/+/+	+/+/+	-/+/+	+/+/+	+/+/+	+/+/+	-/+/+	+/+/+	+/+/+	-/+/+	+/+/+	-/+/+	+/+/+	+/+/+	+/+/+	+/+/+	-/+/+	-/+/+	-/+/+	-/+/+	-/+/+	-/+/+	+/+/+	+/+/+	+/+/+	+/+/-	+/+/+	-/+/+	-/-/-
b0114	aceE	M	+/+/-	+/+/+	+/+/+	+/+/+	+/+/+	+/+/+	+/+/+	+/+/+	+/+/+	+/+/+	+/+/+	+/+/+	+/+/+	+/+/+	+/+/+	+/+/+	+/+/+	+/+/+	+/+/+	+/+/+	-/+/+	-/+/+	-/+/+	-/+/+	-/+/+	+/+/+	+/+/-	+/+/+	+/+/+	+/-/-
b0115	aceF	M	+/+/-	+/+/+	+/+/+	+/+/+	+/+/+	+/+/+	+/+/+	+/+/+	+/+/+	+/+/+	+/+/+	+/+/+	+/+/+	+/+/+	+/+/+	+/+/+	+/+/+	+/+/+	+/+/+	+/+/+	-/+/+	-/+/+	+/+/+	-/+/+	-/+/+	+/+/+	+/+/-	+/+/+	+/+/+	+/-/-
b0116	lpd	M	+/+/-	+/+/+	+/+/+	-/+/+	+/+/+	+/+/+	+/+/+	+/+/+	+/+/+	+/+/+	+/+/+	+/+/+	-/+/+	-/+/+	-/+/+	+/+/+	-/+/+	-/+/+	-/+/+	-/+/+	-/+/+	-/+/+	-/+/+	-/+/+	-/+/+	-/+/+	-/+/-	+/+/+	-/+/+	+/-/-
b0118	acnB	M	+/+/-	+/+/-	+/+/-	+/+/-	+/+/-	+/+/-	+/+/-	+/+/-	+/+/-	+/+/-	+/+/-	+/+/-	+/+/-	+/+/-	+/+/-	+/+/-	+/+/-	+/+/-	+/+/+	+/+/-	+/+/-	+/+/-	+/+/-	-/+/-	-/+/-	+/+/-	+/+/-	+/+/-	+/+/-	+/-/-
b0121	speE	M	+/-/-	+/-/-	+/-/-	+/-/-	+/-/-	+/-/-	+/-/-	+/-/-	+/-/-	+/-/-	+/-/-	+/-/-	+/-/-	+/-/-	+/-/-	+/-/-	+/-/-	-/-/-	+/-/-	+/-/-	+/-/-	+/-/-	+/-/-	+/-/-	-/-/-	+/-/-	+/-/-	+/-/-	+/-/-	+/-/-
b0158	btuF	M	+/+/-	+/+/+	+/+/+	+/+/+	+/+/+	+/+/+	+/+/+	+/+/+	+/+/+	+/+/+	+/+/+	+/+/+	+/+/+	+/+/+	+/+/+	+/+/+	+/+/+	-/+/+	+/+/+	+/+/+	+/+/+	+/+/+	+/+/+	+/+/+	+/+/+	+/+/+	+/+/-	+/+/+	+/+/+	+/-/-
b0162	cdaR	R	+/+/-	+/+/+	+/+/+	+/+/+	+/+/+	+/+/+	+/+/+	+/+/+	+/+/+	+/+/+	+/+/+	+/+/+	+/+/+	+/+/+	+/+/+	+/+/+	+/+/+	-/+/+	+/+/+	+/+/+	+/+/+	+/+/+	+/+/+	+/+/+	+/+/+	+/+/+	+/+/-	+/+/+	+/+/+	+/-/-
b0197	metQ	M	+/+/-	+/+/+	+/+/+	+/+/+	+/+/+	+/+/+	+/+/+	+/+/+	+/+/+	+/+/+	+/+/+	+/+/+	+/+/+	+/+/+	+/+/+	+/+/+	+/+/+	-/+/+	+/+/+	+/+/+	+/+/+	+/+/+	+/+/+	+/+/+	+/+/+	+/+/+	+/+/-	+/+/+	+/+/+	+/-/-
b0333	prpC	M	+/+/-	+/+/+	+/+/+	+/+/+	+/+/+	+/+/+	+/+/+	+/+/+	+/+/+	+/+/+	+/+/+	+/+/+	+/+/+	+/+/+	+/+/+	+/+/+	+/+/+	+/+/+	+/+/+	+/+/+	+/+/+	+/+/+	+/+/+	-/+/+	-/+/+	+/+/+	+/+/-	+/+/+	+/+/+	+/-/-
b0334	prpD	M	+/+/-	+/+/+	+/+/+	+/+/+	+/+/+	+/+/+	+/+/+	+/+/+	+/+/+	+/+/+	+/+/+	+/+/+	+/+/+	+/+/+	+/+/+	+/+/+	+/+/+	+/+/+	+/+/+	+/+/+	+/+/+	+/+/+	+/+/+	+/+/+	+/+/+	+/+/+	+/+/-	+/+/+	+/+/+	+/-/-
b0429	cyoD	M	+/+/-	+/+/+	+/+/+	+/+/+	+/+/+	+/+/+	+/+/+	+/+/+	+/+/+	+/+/+	+/+/+	+/+/+	+/+/+	+/+/+	+/+/+	+/+/+	+/+/+	+/+/+	+/+/+	+/+/+	+/+/+	-/+/+	+/+/+	-/+/+	-/+/+	+/+/+	+/+/-	+/+/+	+/+/+	+/-/-
b0430	cyoC	M	+/+/-	+/+/+	+/+/+	+/+/+	+/+/+	+/+/+	+/+/+	+/+/+	+/+/+	+/+/+	+/+/+	+/+/+	+/+/+	+/+/+	+/+/+	+/+/+	+/+/+	+/+/+	+/+/+	+/+/+	+/+/+	-/+/+	+/+/+	+/+/+	+/+/+	+/+/+	+/+/-	+/+/+	+/+/+	+/-/-
b0432	cyoA	M	+/+/-	+/+/+	+/+/+	+/+/+	+/+/+	+/+/+	+/+/+	+/+/+	+/+/+	+/+/+	+/+/+	+/+/+	+/+/+	+/+/+	+/+/+	+/+/+	+/+/+	+/+/+	+/+/+	+/+/+	+/+/+	-/+/+	+/+/+	-/+/+	-/+/+	+/+/+	+/+/-	+/+/+	+/+/+	+/-/-
b0509	glxR	M	-/+/-	+/+/+	+/+/+	+/+/+	+/+/+	+/+/+	+/+/+	+/+/+	+/+/+	+/+/+	+/+/+	+/+/+	+/+/+	+/+/+	+/+/+	+/+/+	+/+/+	-/+/+	+/+/+	+/+/+	+/+/+	+/+/+	+/+/+	+/+/+	+/+/+	+/+/+	+/+/-	+/+/+	+/+/+	+/-/-
b0662	ubiF	M	+/+/-	+/+/+	-/+/+	+/+/+	+/+/+	+/+/+	+/+/+	+/+/+	+/+/+	+/+/+	+/+/+	-/+/+	+/+/+	+/+/+	-/+/+	+/+/+	-/+/+	-/+/+	-/+/+	-/+/+	-/+/+	-/+/+	-/+/+	-/+/+	-/+/+	+/+/+	+/+/-	+/+/+	-/+/+	-/-/-
b0676	nagC	R	+/+/-	+/+/-	+/+/-	+/+/-	+/+/-	+/+/-	+/+/-	+/+/-	+/+/-	+/+/-	+/+/-	+/+/-	+/+/-	+/+/-	+/+/-	+/+/-	+/+/-	+/+/-	-/+/-	+/+/-	-/+/-	+/+/-	+/+/-	-/+/-	-/+/-	+/+/-	+/+/-	+/+/-	+/+/-	+/-/-
b0720	gltA	M	-/-/-	-/-/-	-/-/-	-/-/-	-/-/-	-/-/-	-/-/-	-/-/-	+/-/-	+/-/-	-/-/-	+/-/-	-/-/-	-/-/-	-/-/-	-/-/-	-/-/-	-/-/-	+/+/+	-/-/-	-/-/-	-/-/-	-/-/-	-/-/-	-/-/-	+/-/-	-/-/-	-/-/-	-/-/-	-/-/-
b0721	sdhC	M	+/+/-	+/+/+	+/+/+	+/+/+	+/+/+	+/+/+	+/+/+	+/+/+	+/+/+	+/+/+	+/+/+	+/+/+	+/+/+	+/+/+	+/+/+	+/+/+	+/+/+	-/-/-	-/+/-	+/+/+	-/-/-	-/+/+	+/+/+	-/+/+	-/+/+	+/+/+	+/+/-	+/+/+	+/+/+	+/-/-
b0722	sdhD	M	+/+/-	+/+/+	+/+/+	+/+/+	+/+/+	+/+/+	+/+/+	+/+/+	+/+/+	+/+/+	+/+/+	+/+/+	-/+/+	+/+/+	-/+/+	+/+/+	+/+/+	-/-/-	-/+/-	+/+/+	-/-/-	-/+/+	-/+/+	-/+/+	-/+/+	+/+/+	+/+/-	+/+/+	+/+/+	+/-/-
b0723	sdhA	M	+/+/-	+/+/+	+/+/+	-/+/+	+/+/+	+/+/+	+/+/+	+/+/+	+/+/+	+/+/+	+/+/+	+/+/+	-/+/+	+/+/+	-/+/+	+/+/+	-/+/+	-/-/-	-/+/-	-/+/+	-/-/-	-/+/+	+/+/+	-/+/+	-/+/+	+/+/+	+/+/-	+/+/+	+/+/+	+/-/-
b0724	sdhB	M	+/+/-	+/+/+	+/+/+	+/+/+	+/+/+	+/+/+	+/+/+	+/+/+	+/+/+	+/+/+	+/+/+	+/+/+	+/+/+	+/+/+	+/+/+	+/+/+	+/+/+	-/-/-	+/+/-	+/+/+	+/-/-	+/+/+	+/+/+	+/+/+	-/+/+	+/+/+	+/+/-	+/+/+	+/+/+	+/-/-
b0726	sucA	M	+/+/-	+/+/+	+/+/+	-/+/+	+/+/+	+/+/+	+/+/+	+/+/+	+/+/+	+/+/+	+/+/+	+/+/+	-/+/+	+/+/+	-/+/+	+/+/+	-/+/+	-/+/+	-/+/+	-/+/+	-/+/+	-/+/+	-/+/+	-/+/+	-/+/+	-/+/+	+/+/-	+/+/+	-/+/+	-/-/-
b0728	sucC	M	+/+/-	+/+/+	+/+/+	+/+/+	+/+/+	+/+/+	+/+/+	+/+/+	+/+/+	+/+/+	+/+/+	+/+/+	+/+/+	+/+/+	+/+/+	+/+/+	+/+/+	-/+/+	-/+/+	+/+/+	+/+/+	+/+/+	+/+/+	-/+/+	-/+/+	+/+/+	+/+/-	+/+/+	+/+/+	+/-/-
b0734	cydB	M	+/+/-	+/+/+	+/+/+	+/+/+	+/+/+	+/+/+	+/+/+	+/+/+	+/+/+	+/+/+	+/+/+	+/+/+	+/+/+	+/+/+	+/+/+	+/+/+	+/+/+	+/+/+	+/+/+	+/+/+	+/+/+	+/+/+	+/+/+	+/+/+	+/+/+	+/+/+	+/+/-	+/+/+	+/+/+	+/-/-
b0871	poxB	M	+/+/-	+/+/+	+/+/+	+/+/+	+/+/+	+/+/+	+/+/+	+/+/+	+/+/+	+/+/+	+/+/+	+/+/+	+/+/+	+/+/+	+/+/+	+/+/+	+/+/+	-/+/+	-/+/+	+/+/+	+/+/+	+/+/+	+/+/+	+/+/+	+/+/+	+/+/+	+/+/-	+/+/+	+/+/+	+/-/-
b0902	pflA	M	+/+/-	+/+/+	+/+/+	+/+/+	+/+/+	+/+/+	+/+/+	+/+/+	+/+/+	+/+/+	+/+/+	+/+/+	+/+/+	+/+/+	+/+/+	+/+/+	+/+/+	-/+/+	+/+/+	+/+/+	+/+/+	+/+/+	+/+/+	+/+/+	+/+/+	+/+/+	+/+/-	+/+/+	+/+/+	+/-/-
b0995	torR	R	+/+/-	+/+/+	+/+/+	+/+/+	+/+/+	+/+/+	+/+/+	+/+/+	+/+/+	+/+/+	+/+/+	+/+/+	+/+/+	+/+/+	+/+/+	+/+/+	+/+/+	-/+/+	+/+/+	+/+/+	+/+/+	+/+/+	+/+/+	+/+/+	+/+/+	+/+/+	+/+/-	+/+/+	+/+/+	+/-/-
b1006	rutG	M	+/+/-	+/+/+	+/+/+	+/+/+	+/+/+	+/+/+	+/+/+	+/+/+	+/+/+	+/+/+	+/+/+	+/+/+	+/+/+	+/+/+	+/+/+	+/+/+	+/+/+	-/+/+	+/+/+	+/+/+	+/+/+	+/+/+	+/+/+	+/+/+	+/+/+	+/+/+	+/+/-	+/+/+	+/-/-	+/-/-
b1136	icd	M	+/-/-	+/-/-	-/-/-	-/-/-	+/-/-	+/-/-	-/-/-	-/-/-	+/-/-	+/-/-	+/-/-	+/-/-	-/-/-	-/-/-	-/-/-	-/-/-	-/-/-	-/-/-	-/+/+	-/-/-	-/-/-	-/-/-	-/-/-	-/-/-	-/-/-	+/-/-	-/-/-	+/-/-	+/-/-	-/-/-
b1187	fadR	R	+/+/-	+/+/+	+/+/+	+/+/+	+/+/+	+/+/+	+/+/+	+/+/+	+/+/+	+/+/+	+/+/+	+/+/+	+/+/+	+/+/+	+/+/+	+/+/+	+/+/+	+/+/+	+/+/+	+/+/+	+/+/+	+/+/+	+/+/+	+/+/+	-/+/+	+/+/+	+/+/-	+/+/+	+/+/+	+/-/-
b1197	treA	M	+/+/-	+/+/+	+/+/+	+/+/+	+/+/+	+/+/+	+/+/+	+/+/+	-/+/+	+/+/+	+/+/+	+/+/+	+/+/+	+/+/+	+/+/+	+/+/+	+/+/+	+/+/+	+/+/+	+/+/+	+/+/+	+/+/+	+/+/+	+/+/+	+/+/+	+/+/+	+/+/-	+/+/+	+/+/+	+/-/-
b1221	narL	R	+/+/-	+/+/+	+/+/+	+/+/+	+/+/+	+/+/+	-/+/+	+/+/+	+/+/+	+/+/+	+/+/+	+/+/+	+/+/+	+/+/+	+/+/+	+/+/+	+/+/+	+/+/+	+/+/+	+/+/+	+/+/+	+/+/+	+/+/+	+/+/+	+/+/+	+/+/+	+/+/-	+/+/+	+/+/+	+/-/-
b1241	adhE	M	+/+/-	+/+/+	+/+/+	+/+/+	+/+/+	+/+/+	-/+/+	+/+/+	+/+/+	+/+/+	+/+/+	+/+/+	+/+/+	+/+/+	+/+/+	+/+/+	+/+/+	+/+/+	+/+/+	+/+/+	+/+/+	+/+/+	+/+/+	+/+/+	+/+/+	+/+/+	+/+/-	+/+/+	+/+/+	+/-/-
b1276	acnA	M	+/+/-	+/+/+	+/+/+	+/+/+	+/+/+	+/+/+	-/+/+	+/+/+	+/+/+	+/+/+	+/+/+	+/+/+	+/+/+	+/+/+	+/+/+	+/+/+	+/+/+	-/+/+	+/+/+	+/+/+	+/+/+	+/+/+	+/+/+	+/+/+	+/+/+	+/+/+	+/+/-	+/+/+	+/+/+	+/-/-
b1323	tyrR	R	-/+/-	+/+/+	+/+/+	+/+/+	+/+/+	-/+/+	-/+/+	+/+/+	+/+/+	+/+/+	-/+/+	+/+/+	+/+/+	+/+/+	+/+/+	+/+/+	+/+/+	+/+/+	-/+/+	+/+/+	-/+/+	+/+/+	+/+/+	+/+/+	-/+/+	+/+/+	+/+/-	+/+/+	+/+/+	+/-/-
b1334	fnr	R	+/+/-	+/+/+	+/+/+	+/+/+	+/+/+	+/+/+	+/+/+	+/+/+	+/+/+	+/+/+	+/+/+	+/+/+	+/+/+	+/+/+	+/+/+	+/+/+	+/+/+	+/+/+	+/+/+	+/+/+	+/+/+	+/+/+	+/+/+	-/+/+	+/+/+	+/+/+	+/+/-	+/+/+	+/+/+	+/-/-
b1479	maeA	M	+/+/-	+/+/+	+/+/+	+/+/+	+/+/+	+/+/+	-/+/+	+/+/+	+/+/+	+/+/+	+/+/+	+/+/+	+/+/+	+/+/+	+/+/+	+/+/+	+/+/+	+/+/+	+/+/+	+/+/+	+/+/+	+/+/+	+/+/+	+/+/+	+/+/+	+/+/+	+/+/-	+/+/+	+/+/+	+/-/-
b1524	yneH	M	+/+/-	+/+/+	+/+/+	+/+/+	+/+/+	+/+/+	+/+/+	+/+/+	+/+/+	+/+/+	+/+/+	+/+/+	+/+/+	+/+/+	+/+/+	+/+/+	+/+/+	-/+/+	+/+/+	+/+/+	+/+/+	-/+/+	+/+/+	+/+/+	+/+/+	+/+/+	+/+/-	+/+/+	+/+/+	+/-/-
b1612	fumA	M	+/+/-	+/+/+	+/+/+	+/+/+	+/+/+	+/+/+	+/+/+	+/+/+	+/+/+	+/+/+	+/+/+	+/+/+	+/+/+	+/+/+	+/+/+	+/+/+	+/+/+	+/+/+	+/+/+	+/+/+	+/+/+	+/+/+	+/+/+	+/+/+	-/+/+	+/+/+	+/+/-	+/+/+	+/+/+	+/-/-
b1658	purR	R	+/+/-	+/+/+	+/+/+	+/+/+	+/+/+	+/+/+	+/+/+	+/+/+	+/+/+	+/+/+	+/+/+	+/+/+	+/+/+	+/+/+	+/+/+	+/+/+	+/+/+	+/+/+	+/+/+	+/+/+	+/+/+	+/+/+	+/+/+	+/+/+	+/+/+	+/+/+	+/+/-	+/+/+	+/+/+	+/-/-
b1692	ydiB	M	-/+/-	+/+/+	+/+/+	+/+/+	+/+/+	+/+/+	+/+/+	+/+/+	+/+/+	+/+/+	-/+/+	+/+/+	+/+/+	+/+/+	+/+/+	+/+/+	+/+/+	-/+/+	+/+/+	+/+/+	+/+/+	+/+/+	+/+/+	+/+/+	+/+/+	+/+/+	+/+/-	+/+/+	+/+/+	+/-/-
b1702	pps	M	+/+/-	+/+/+	+/+/+	+/+/+	+/+/+	+/+/+	+/+/+	+/+/+	+/+/+	+/+/+	+/+/+	+/+/+	+/+/+	+/+/+	+/+/+	+/+/+	+/+/+	-/+/+	+/+/+	+/+/+	+/+/+	-/+/+	+/+/+	+/+/+	+/+/+	+/+/+	+/+/-	+/+/+	+/+/+	+/-/-
b1768	pncA	M	-/+/-	+/+/+	+/+/+	+/+/+	+/+/+	+/+/+	+/+/+	+/+/+	+/+/+	+/+/+	+/+/+	+/+/+	+/+/+	+/+/+	+/+/+	+/+/+	+/+/+	-/+/+	+/+/+	+/+/+	+/+/+	+/+/+	+/+/+	+/+/+	-/+/+	+/+/+	+/+/-	+/+/+	+/+/+	+/-/-
b1773	ydjI	M	+/+/-	+/+/+	+/+/+	+/+/+	+/+/+	+/+/+	+/+/+	+/+/+	+/+/+	+/+/+	+/+/+	+/+/+	+/+/+	+/+/+	+/+/+	+/+/+	+/+/+	+/+/+	+/+/+	+/+/+	-/+/+	+/+/+	+/+/+	+/+/+	+/+/+	+/+/+	+/+/-	+/+/+	+/+/+	+/-/-
b1896	otsA	M	+/+/-	+/+/+	+/+/+	+/+/+	+/+/+	+/+/+	+/+/+	+/+/+	+/+/+	+/+/+	+/+/+	+/+/+	+/+/+	+/+/+	+/+/+	+/+/+	+/+/+	+/+/+	+/+/+	+/+/+	+/+/+	+/+/+	+/+/+	+/+/+	+/+/+	+/+/+	+/+/-	+/+/+	+/+/+	+/-/-
b2029	gnd	M	+/+/-	+/+/+	+/+/+	+/+/+	+/+/+	+/+/+	+/+/+	+/+/+	+/+/+	+/+/+	+/+/+	+/+/+	+/+/+	+/+/+	+/+/+	+/+/+	+/+/+	-/+/+	+/+/+	+/+/+	+/+/+	+/+/+	+/+/+	+/+/+	+/+/+	+/+/+	+/+/-	+/+/+	+/+/+	+/-/-
b2128	yehW	M	+/+/-	+/+/+	+/+/+	+/+/+	+/+/+	+/+/+	+/+/+	+/+/+	+/+/+	+/+/+	+/+/+	+/+/+	+/+/+	+/+/+	+/+/+	+/+/+	+/+/+	-/+/+	+/+/+	+/+/+	+/+/+	+/+/+	+/+/+	+/+/+	+/+/+	+/+/+	+/+/-	+/+/+	+/+/+	+/-/-
b2130	yehY	M	+/+/-	+/+/+	+/+/+	+/+/+	+/+/+	+/+/+	+/+/+	+/+/+	+/+/+	+/+/+	+/+/+	+/+/+	+/+/+	+/+/+	+/+/+	+/+/+	+/+/+	-/+/+	+/+/+	+/+/+	+/+/+	+/+/+	+/+/+	+/+/+	+/+/+	+/+/+	+/+/-	+/+/+	+/+/+	+/-/-
b2131	yehZ	M	+/+/-	+/+/+	+/+/+	+/+/+	+/+/+	+/+/+	-/+/+	+/+/+	+/+/+	+/+/+	+/+/+	+/+/+	+/+/+	+/+/+	+/+/+	+/+/+	+/+/+	+/+/+	+/+/+	+/+/+	+/+/+	+/+/+	+/+/+	+/+/+	+/+/+	+/+/+	+/+/-	+/+/+	+/+/+	+/-/-
b2219	atoS	R	+/+/-	+/+/+	+/+/+	+/+/+	+/+/+	+/+/+	+/+/+	+/+/+	+/+/+	+/+/+	+/+/+	+/+/+	+/+/+	+/+/+	+/+/+	+/+/+	+/+/+	-/+/+	+/+/+	+/+/+	+/+/+	+/+/+	+/+/+	+/+/+	+/+/+	+/+/+	+/+/-	+/+/+	+/+/+	+/-/-
b2276	nuoN	M	+/+/-	+/+/+	+/+/+	-/+/+	+/+/+	-/+/+	+/+/+	+/+/+	+/+/+	+/+/+	-/+/+	+/+/+	-/+/+	+/+/+	-/+/+	+/+/+	-/+/+	-/+/+	-/+/+	-/+/+	-/+/+	-/+/+	-/+/+	-/+/+	-/+/+	-/+/+	+/+/-	-/+/+	-/+/+	-/-/-
b2277	nuoM	M	+/+/-	+/+/+	+/+/+	+/+/+	+/+/+	+/+/+	+/+/+	+/+/+	+/+/+	+/+/+	-/+/+	+/+/+	+/+/+	+/+/+	+/+/+	+/+/+	+/+/+	-/+/+	-/+/+	+/+/+	-/+/+	-/+/+	-/+/+	-/+/+	-/+/+	+/+/+	+/+/-	+/+/+	-/+/+	-/-/-
b2278	nuoL	M	+/+/-	+/+/+	+/+/+	-/+/+	+/+/+	+/+/+	+/+/+	+/+/+	+/+/+	+/+/+	-/+/+	+/+/+	+/+/+	+/+/+	-/+/+	+/+/+	+/+/+	-/+/+	-/+/+	-/+/+	-/+/+	-/+/+	-/+/+	-/+/+	-/+/+	-/+/+	+/+/-	+/+/+	-/+/+	-/-/-
b2279	nuoK	M	+/+/-	+/+/+	+/+/+	+/+/+	+/+/+	+/+/+	+/+/+	+/+/+	+/+/+	+/+/+	-/+/+	+/+/+	+/+/+	+/+/+	-/+/+	+/+/+	+/+/+	-/+/+	-/+/+	+/+/+	-/+/+	-/+/+	-/+/+	-/+/+	-/+/+	-/+/+	+/+/-	+/+/+	-/+/+	-/-/-
b2280	nuoJ	M	+/+/-	+/+/+	+/+/+	+/+/+	+/+/+	+/+/+	+/+/+	+/+/+	+/+/+	+/+/+	-/+/+	+/+/+	+/+/+	+/+/+	-/+/+	+/+/+	+/+/+	-/+/+	-/+/+	+/+/+	-/+/+	-/+/+	-/+/+	-/+/+	-/+/+	-/+/+	+/+/-	+/+/+	-/+/+	-/-/-
b2281	nuoI	M	+/+/-	+/+/+	+/+/+	+/+/+	+/+/+	+/+/+	+/+/+	+/+/+	+/+/+	+/+/+	-/+/+	+/+/+	+/+/+	+/+/+	-/+/+	+/+/+	+/+/+	-/+/+	-/+/+	+/+/+	-/+/+	-/+/+	-/+/+	-/+/+	-/+/+	-/+/+	+/+/-	+/+/+	-/+/+	-/-/-
b2282	nuoH	M	+/+/-	+/+/+	+/+/+	-/+/+	+/+/+	-/+/+	+/+/+	+/+/+	+/+/+	-/+/+	-/+/+	+/+/+	-/+/+	+/+/+	+/+/+	+/+/+	+/+/+	-/+/+	-/+/+	-/+/+	-/+/+	-/+/+	-/+/+	-/+/+	-/+/+	-/+/+	+/+/-	+/+/+	-/+/+	-/-/-
b2283	nuoG	M	+/+/-	+/+/+	+/+/+	-/+/+	+/+/+	+/+/+	+/+/+	+/+/+	+/+/+	+/+/+	+/+/+	+/+/+	+/+/+	+/+/+	+/+/+	+/+/+	+/+/+	-/+/+	-/+/+	+/+/+	-/+/+	-/+/+	-/+/+	-/+/+	-/+/+	+/+/+	+/+/-	+/+/+	+/+/+	-/-/-
b2284	nuoF	M	+/+/-	+/+/+	+/+/+	-/+/+	+/+/+	+/+/+	+/+/+	+/+/+	+/+/+	+/+/+	+/+/+	+/+/+	-/+/+	+/+/+	+/+/+	+/+/+	+/+/+	-/+/+	-/+/+	-/+/+	-/+/+	-/+/+	-/+/+	-/+/+	-/+/+	-/+/+	+/+/-	-/+/+	-/+/+	-/-/-
b2285	nuoE	M	+/+/-	+/+/+	+/+/+	-/+/+	+/+/+	+/+/+	+/+/+	+/+/+	+/+/+	+/+/+	-/+/+	+/+/+	+/+/+	+/+/+	+/+/+	+/+/+	+/+/+	-/+/+	-/+/+	-/+/+	-/+/+	-/+/+	-/+/+	-/+/+	-/+/+	-/+/+	+/+/-	+/+/+	+/+/+	-/-/-
b2287	nuoB	M	+/+/-	+/+/+	+/+/+	+/+/+	+/+/+	+/+/+	+/+/+	+/+/+	+/+/+	+/+/+	+/+/+	+/+/+	+/+/+	+/+/+	+/+/+	+/+/+	+/+/+	+/+/+	+/+/+	+/+/+	-/+/+	-/+/+	-/+/+	-/+/+	-/+/+	-/+/+	+/+/-	+/+/+	+/+/+	-/-/-
b2288	nuoA	M	+/+/-	+/+/+	+/+/+	+/+/+	+/+/+	+/+/+	+/+/+	+/+/+	+/+/+	+/+/+	+/+/+	+/+/+	+/+/+	+/+/+	+/+/+	+/+/+	+/+/+	-/+/+	-/+/+	+/+/+	-/+/+	-/+/+	-/+/+	-/+/+	-/+/+	-/+/+	+/+/-	+/+/+	+/+/+	-/-/-
b2364	dsdC	R	+/+/-	+/+/+	+/+/+	+/+/+	+/+/+	+/+/+	+/+/+	+/+/+	+/+/+	+/+/+	+/+/+	+/+/+	+/+/+	+/+/+	+/+/+	+/+/+	+/+/+	+/+/+	+/+/+	+/+/+	+/+/+	+/+/+	+/+/+	+/+/+	+/+/+	+/+/+	-/+/-	+/+/+	+/+/+	+/-/-
b2418	pdxK	M	+/+/-	+/+/+	+/+/+	+/+/+	+/+/+	+/+/+	+/+/+	+/+/+	+/+/+	+/+/+	+/+/+	+/+/+	+/+/+	+/+/+	+/+/+	+/+/+	+/+/+	-/+/+	+/+/+	+/+/+	+/+/+	+/+/+	+/+/+	+/+/+	+/+/+	+/+/+	+/+/-	+/+/+	+/+/+	+/-/-
b2463	maeB	M	+/+/-	+/+/+	+/+/+	+/+/+	+/+/+	+/+/+	+/+/+	+/+/+	+/+/+	+/+/+	+/+/+	+/+/+	+/+/+	+/+/+	+/+/+	+/+/+	+/+/+	+/+/+	+/+/+	+/+/+	+/+/+	+/+/+	+/+/+	+/+/+	+/+/+	+/+/+	+/+/-	+/+/+	+/+/+	+/-/-
b2464	talA	M	+/+/-	+/+/+	+/+/+	+/+/+	+/+/+	-/+/+	+/+/+	+/+/+	+/+/+	+/+/+	+/+/+	+/+/+	+/+/+	+/+/+	+/+/+	+/+/+	+/+/+	-/+/+	+/+/+	+/+/+	+/+/+	+/+/+	+/+/+	+/+/+	+/+/+	+/+/+	+/+/-	+/+/+	+/+/+	+/-/-
b2687	luxS	M	-/+/-	+/+/+	+/+/+	+/+/+	+/+/+	+/+/+	+/+/+	+/+/+	+/+/+	+/+/+	+/+/+	+/+/+	+/+/+	+/+/+	+/+/+	+/+/+	+/+/+	-/+/+	-/+/+	+/+/+	+/+/+	+/+/+	+/+/+	+/+/+	+/+/+	+/+/+	+/+/-	+/+/+	+/+/+	+/-/-
b2707	srlR	R	+/+/-	+/+/+	+/+/+	+/+/+	+/+/+	+/+/+	+/+/+	+/+/+	+/+/+	+/+/+	+/+/+	+/+/+	+/+/+	+/+/+	+/+/+	+/+/+	+/+/+	-/+/+	+/+/+	+/+/+	-/+/+	+/+/+	+/+/+	-/+/+	-/+/+	+/+/+	+/+/-	+/+/+	+/+/+	+/-/-
b2741	rpoS	R	+/+/-	+/+/+	+/+/+	+/+/+	+/+/+	+/+/+	+/+/+	+/+/+	+/+/+	+/+/+	+/+/+	+/+/+	+/+/+	+/+/+	+/+/+	+/+/+	+/+/+	+/+/+	+/+/+	+/+/+	+/+/+	+/+/+	+/+/+	+/+/+	+/+/+	+/+/+	+/+/-	+/+/+	+/+/+	+/-/-
b2914	rpiA	M	+/+/-	+/+/-	+/+/-	+/+/-	+/+/-	+/+/-	+/+/-	+/+/-	+/+/-	+/+/-	+/+/-	+/+/-	+/+/-	-/+/-	+/+/-	+/+/-	+/+/-	+/+/-	-/+/-	+/+/-	+/+/-	+/+/-	+/+/-	+/+/-	+/+/-	+/+/-	+/+/-	+/+/+	+/+/+	+/-/-
b2976	glcB	M	+/+/-	+/+/+	+/+/+	+/+/+	+/+/+	+/+/+	+/+/+	+/+/+	+/+/+	+/+/+	+/+/+	+/+/+	+/+/+	+/+/+	+/+/+	+/+/+	+/+/+	+/+/+	+/+/+	+/+/+	+/+/+	-/+/+	+/+/+	+/+/+	+/+/+	+/+/+	+/+/-	+/+/+	+/+/+	+/-/-
b3118	tdcA	R	+/+/-	+/+/+	+/+/+	+/+/+	+/+/+	+/+/+	-/+/+	+/+/+	+/+/+	+/+/+	+/+/+	+/+/+	+/+/+	+/+/+	+/+/+	+/+/+	+/+/+	+/+/+	-/+/+	+/+/+	-/+/+	+/+/+	+/+/+	+/+/+	-/+/+	+/+/+	+/+/-	+/+/+	+/+/+	+/-/-
b3202	rpoN	R	+/+/-	+/+/+	+/+/+	+/+/+	+/+/+	+/+/+	+/+/+	+/+/+	+/+/+	+/+/+	+/+/+	+/+/+	+/+/+	+/+/+	+/+/+	+/+/+	+/+/+	+/+/+	+/+/+	+/+/+	+/+/+	+/+/+	+/+/+	+/+/+	+/+/+	+/+/+	+/+/-	+/+/+	+/+/+	+/-/-
b3236	mdh	M	+/+/-	+/+/+	+/+/+	+/+/+	+/+/+	+/+/+	+/+/+	+/+/+	+/+/+	+/+/+	+/+/+	+/+/+	+/+/+	+/+/+	-/+/+	+/+/+	+/+/+	-/+/+	-/+/+	-/+/+	-/+/+	-/+/+	-/+/+	-/+/+	-/+/+	+/+/+	+/+/-	+/+/+	+/+/+	+/-/-
b3237	argR	R	+/+/-	+/+/+	+/+/+	+/+/+	+/+/+	+/+/+	+/+/+	+/+/+	+/+/+	+/+/+	+/+/+	+/+/+	+/+/+	+/+/+	+/+/+	+/+/+	+/+/+	+/+/+	+/+/+	+/+/+	+/+/+	+/+/+	+/+/+	+/+/+	-/+/+	+/+/+	+/+/-	+/+/+	+/+/+	+/-/-
b3261	fis	R	+/+/-	+/+/+	+/+/+	+/+/+	+/+/+	+/+/+	+/+/+	+/+/+	+/+/+	+/+/+	+/+/+	+/+/+	+/+/+	+/+/+	+/+/+	+/+/+	+/+/+	+/+/+	+/+/+	+/+/+	+/+/+	+/+/+	+/+/+	+/+/+	+/+/+	+/+/+	+/+/-	+/+/+	+/+/+	+/-/-
b3357	crp	R	-/+/-	+/+/+	-/+/+	-/+/+	-/+/+	+/+/+	+/+/+	-/+/+	+/+/+	+/+/+	+/+/+	-/+/+	-/+/-	-/+/+	-/+/+	-/+/+	-/+/+	-/+/+	-/+/+	-/+/+	-/+/+	-/+/+	+/+/+	-/+/+	-/+/+	-/+/+	-/+/-	+/+/+	+/+/+	+/-/-
b3380	yhfW	M	+/+/-	+/+/+	+/+/+	+/+/+	+/+/+	+/+/+	+/+/+	+/+/+	+/+/+	+/+/+	+/+/+	+/+/+	+/+/+	+/+/+	+/+/+	+/+/+	+/+/+	+/+/+	-/+/+	+/+/+	+/+/+	+/+/+	+/+/+	+/+/+	+/+/+	+/+/+	+/+/-	+/+/+	+/+/+	+/-/-
b3386	rpe	M	+/+/-	+/+/+	+/+/+	+/+/+	+/+/+	+/+/+	+/+/+	+/+/+	+/+/+	+/+/+	+/+/+	+/+/+	+/+/+	+/+/+	+/+/+	-/+/+	+/+/+	+/+/+	+/+/+	+/+/+	+/+/+	+/+/+	+/+/+	+/+/+	+/+/+	+/+/+	+/+/-	-/+/+	-/+/+	+/-/-
b3403	pck	M	+/+/-	+/+/+	+/+/+	+/+/+	+/+/+	+/+/+	+/+/+	+/+/+	+/+/+	+/+/+	+/+/+	+/+/+	+/+/+	+/+/+	+/+/+	+/+/+	+/+/+	-/+/+	+/+/+	+/+/+	+/+/+	+/+/+	+/+/+	+/+/+	+/+/+	+/+/+	+/+/-	+/+/+	+/+/+	+/-/-
b3405	ompR	R	+/+/-	+/+/+	+/+/+	+/+/+	+/+/+	+/+/+	+/+/+	+/+/+	+/+/+	+/+/+	+/+/+	+/+/+	+/+/+	+/+/+	+/+/+	+/+/+	+/+/+	-/+/+	-/+/+	+/+/+	+/+/+	+/+/+	+/+/+	+/+/+	+/+/+	+/+/+	+/+/-	+/+/+	+/+/+	+/-/-
b3605	lldD	M	+/+/-	+/+/+	+/+/+	+/+/+	+/+/+	+/+/+	+/+/+	+/+/+	+/+/+	+/+/+	+/+/+	+/+/+	+/+/+	+/+/+	+/+/+	+/+/+	+/+/+	+/+/+	+/+/+	+/+/+	+/+/+	+/+/+	+/+/+	+/+/+	+/+/+	+/+/+	+/+/-	+/+/+	+/+/+	+/-/-
b3612	gpmI	M	+/+/-	+/+/+	+/+/+	+/+/+	+/+/+	+/+/+	+/+/+	+/+/+	+/+/+	+/+/+	+/+/+	+/+/+	+/+/+	+/+/+	+/+/+	+/+/+	+/+/+	-/+/+	-/+/+	+/+/+	-/+/+	+/+/+	+/+/+	+/+/+	-/+/+	+/+/+	+/+/-	+/+/+	+/+/+	+/-/-
b3693	dgoK	M	+/+/-	+/+/+	+/+/+	+/+/+	+/+/+	+/+/+	+/+/+	+/+/+	+/+/+	+/+/+	+/+/+	+/+/+	+/+/+	-/-/-	+/+/+	+/+/+	+/+/+	+/+/+	+/+/+	+/+/+	+/+/+	+/+/+	+/+/+	+/+/+	+/+/+	+/+/+	+/+/-	+/+/+	+/+/+	+/-/-
b3725	pstB	M	+/+/-	+/+/+	+/+/+	+/+/+	+/+/+	+/+/+	+/+/+	+/+/+	+/+/+	+/+/+	+/+/+	+/+/+	+/+/+	+/+/+	+/+/+	+/+/+	+/+/+	-/+/+	+/+/+	+/+/+	+/+/+	+/+/+	+/+/+	+/+/+	-/+/+	+/+/+	+/+/-	+/+/+	+/+/+	+/-/-
b3868	glnG	R	+/+/-	+/+/+	+/+/+	+/+/+	+/+/+	+/+/+	+/+/+	+/+/+	+/+/+	+/+/+	+/+/+	+/+/+	+/+/+	+/+/+	+/+/+	+/+/+	+/+/+	+/+/+	+/+/+	+/+/+	-/+/+	+/+/+	+/+/+	+/+/+	+/+/+	+/+/+	+/+/-	+/+/+	+/+/+	+/-/-
b3912	cpxR	R	+/+/-	+/+/+	+/+/+	+/+/+	+/+/+	+/+/+	+/+/+	+/+/+	+/+/+	+/+/+	+/+/+	+/+/+	+/+/+	+/+/+	+/+/+	+/+/+	+/+/+	-/+/+	-/+/+	+/+/+	-/+/+	+/+/+	+/+/+	-/+/+	-/+/+	+/+/+	+/+/-	+/+/+	+/+/+	+/-/-
b3916	pfkA	M	+/+/-	+/+/+	+/+/+	+/+/+	+/+/+	+/+/+	+/+/+	-/+/+	+/+/+	+/+/+	+/+/+	+/+/+	+/+/+	+/+/+	+/+/+	+/+/+	+/+/+	+/+/+	+/+/+	+/+/+	+/+/+	+/+/+	+/+/+	+/+/+	+/+/+	+/+/+	+/+/-	+/+/+	+/+/+	+/-/-
b3938	metJ	R	+/+/-	+/+/+	+/+/+	+/+/+	+/+/+	+/+/+	+/+/+	+/+/+	+/+/+	+/+/+	+/+/+	+/+/+	+/+/+	+/+/+	+/+/+	+/+/+	+/+/+	-/+/+	-/+/+	+/+/+	-/+/+	-/+/+	-/+/+	+/+/+	-/+/+	+/+/+	+/+/-	+/+/+	+/+/+	+/-/-
b3956	ppc	M	+/+/-	+/+/+	+/+/+	+/+/+	+/+/+	+/+/+	+/+/+	-/+/+	+/+/+	+/+/-	+/+/+	+/+/+	-/+/+	-/+/+	-/+/+	+/+/+	-/+/+	-/+/+	+/+/+	+/+/+	+/+/+	-/+/+	+/+/+	+/+/+	+/+/+	+/+/+	+/+/-	+/+/+	-/+/+	-/-/-
b3958	argC	M	+/-/-	+/-/-	+/-/-	+/-/-	+/-/-	+/-/-	+/-/-	-/-/-	+/-/-	+/-/-	+/-/-	+/-/-	-/-/-	-/-/-	-/-/-	+/-/-	-/-/-	-/-/-	-/-/-	-/-/-	-/-/-	-/-/-	-/-/-	-/-/-	-/-/-	+/-/-	+/-/-	+/-/-	+/-/-	-/-/-
b4015	aceA	M	+/+/-	+/+/+	+/+/+	+/+/+	+/+/+	+/+/+	+/+/+	+/+/+	+/+/+	+/+/+	+/+/+	+/+/+	+/+/+	+/+/+	+/+/+	+/+/+	+/+/+	-/-/-	+/+/+	+/+/+	+/+/+	+/+/+	+/+/+	+/+/+	+/+/+	+/+/+	+/+/-	+/+/+	+/+/+	+/-/-
b4036	lamB	M	+/+/-	+/+/+	+/+/+	+/+/+	+/-/-	+/+/+	+/+/+	+/+/+	+/+/+	+/+/+	+/+/+	+/+/+	+/+/+	+/+/+	+/+/+	+/+/+	+/+/+	+/+/+	+/+/+	+/+/+	+/+/+	+/+/+	+/+/+	+/+/+	+/+/+	+/+/+	+/+/-	+/+/+	+/+/+	+/-/-
b4062	soxS	R	+/+/-	+/+/+	+/+/+	+/+/+	+/+/+	+/+/+	-/+/+	+/+/+	+/+/+	+/+/+	-/+/+	+/+/+	+/+/+	+/+/+	+/+/+	+/+/+	+/+/+	+/+/+	+/+/+	+/+/+	+/+/+	+/+/+	+/+/+	+/+/+	+/+/+	+/+/+	+/+/-	+/+/+	+/+/+	+/-/-
b4063	soxR	R	+/+/-	+/+/+	+/+/+	+/+/+	+/+/+	+/+/+	-/+/+	+/+/+	+/+/+	+/+/+	+/+/+	+/+/+	+/+/+	+/+/+	+/+/+	+/+/+	+/+/+	+/+/+	+/+/+	+/+/+	+/+/+	+/+/+	+/+/+	+/+/+	+/+/+	+/+/+	+/+/-	+/+/+	+/+/+	+/-/-
b4124	dcuR	R	+/+/-	+/+/+	+/+/+	+/+/+	+/+/+	+/+/+	+/+/+	+/+/+	+/+/+	+/+/+	+/+/+	+/+/+	+/+/+	+/+/+	+/+/+	+/+/+	+/+/+	+/+/+	+/+/+	+/+/+	-/+/+	+/+/+	+/+/+	-/+/+	-/+/+	+/+/+	+/+/-	+/+/+	+/+/+	+/-/-
b4125	dcuS	R	+/+/-	+/+/+	+/+/+	+/+/+	+/+/+	+/+/+	+/+/+	+/+/+	+/+/+	+/+/+	+/+/+	+/+/+	+/+/+	+/+/+	+/+/+	+/+/+	+/+/+	+/+/+	+/+/+	+/+/+	-/+/+	+/+/+	+/+/+	-/+/+	-/+/+	+/+/+	+/+/-	+/+/+	+/+/+	+/-/-
b4232	fbp	M	+/+/-	+/+/+	+/+/+	+/+/+	+/+/+	+/+/+	+/+/+	+/+/+	+/+/+	+/+/+	+/+/+	-/+/+	+/+/+	-/+/+	+/+/+	+/+/+	-/+/+	-/+/+	-/+/+	+/+/+	-/+/+	-/+/+	-/+/+	-/+/+	-/+/+	+/+/+	+/+/-	+/+/+	+/+/+	-/-/-
b4324	uxuR	R	+/+/-	+/+/+	+/+/+	+/+/+	+/+/+	+/+/+	-/+/+	+/+/+	+/+/+	+/+/+	+/+/+	+/+/+	+/+/+	+/+/+	+/+/+	+/+/+	-/+/+	+/+/+	+/+/+	+/+/+	+/+/+	+/+/+	+/+/+	+/+/+	+/+/+	+/+/+	+/+/-	+/+/+	+/+/+	+/-/-
b4383	deoB	M	+/+/-	+/+/+	+/+/+	+/+/+	+/+/+	+/+/+	+/+/-	+/+/-	+/+/+	+/+/-	+/+/+	+/+/+	+/+/+	+/+/+	+/+/+	+/+/-	+/+/+	-/+/+	+/+/+	+/+/+	+/+/+	+/+/+	+/+/+	+/+/+	+/+/+	+/+/+	+/+/-	-/+/+	-/+/+	-/-/-
[truncated: 83 more columns]
