# Supplementary material for: An Automated Phenotype-Driven Approach (GeneForce) for Refining Metabolic and Regulatory Models
Source: PLoS Comput Biol. 2010 Oct 28;6(10):e1000970. doi: 10.1371/journal.pcbi.1000970 (PMC2965739; doi:10.1371/journal.pcbi.1000970)
Supplement: Table S4 — Detailed statistics of model-data comparisons and alternative optimal solutions for each refinement step. (0.03 MB XLS) [file pcbi.1000970.s006.xls]

## Sheet: Overall Statistics
Overall statistics for each step of refinement
Number of cases where alternative optimal solutions exist are shown in parentheses ( ).
For regulatory gene knockouts, the metabolic model prediciton was made assuming the strain had a wildtype genotype (since transcription factors are not included in the metabolic model).
	Metabolic	iJR904	iJR904	Correction A	iAF1260	iAF1260	Correction B	iAF1260	iAF1260	Correction C
	Regulatory	iMC104	iMC105A	Difference	iMC105A	iMC105AB	Difference	iMC105AB	iMC105ABC	Difference
Metabolic Gene Knockouts	+/+/+	14197	16394	2197	25546	26480	934	26480	26482	2
	+/+/-	2593 (271)	398	-2195	1396 (775)	462	-934	462 (321)	460	-2
	+/-/-	2616	2614	-2	3287	3287	0	3287	3287	0
	-/+/+	2111	2241	130	5412	5477	65	5477	5477	0
	-/+/-	1705 (33)	1575	-130	1897 (237)	1832	-65	1832 (449)	1832	0
	-/-/-	4348	4348	0	7637	7637	0	7637	7637	0
Regulatory Gene Knockouts	+/+/+	2587	3026	439	3299	3400	101	3504	3557	53
	+/+/-	486 (27)	47	-439	150 (86)	49	-101	103 (90)	50	-53
	+/-/-	175	175	0	108	108	0	108	108	0
	-/+/+	399	463	64	686	693	7	717	734	17
	-/+/-	336 (2)	272	-64	233 (28)	226	-7	255 (75)	238	-17
	-/-/-	497	497	0	676	676	0	695	695	0
	Total	32050	32050		50327	50327		50557	50557
	Error Corrected			2636			1035			55
	Error Introduced			194			72			17
	Correct Predictions	23670	26112		39288	40251		40403	40441
	Accuracy (%)	0.738534	0.814727		0.780655	0.799789		0.799157	0.799909
