# Supplementary material for: An Automated Phenotype-Driven Approach (GeneForce) for Refining Metabolic and Regulatory Models
Source: PLoS Comput Biol. 2010 Oct 28;6(10):e1000970. doi: 10.1371/journal.pcbi.1000970 (PMC2965739; doi:10.1371/journal.pcbi.1000970)
Supplement: Table S7 — Simulation conditions for Biolog Phenotype Microarrays (PM) and GN2-Microplate. (0.06 MB XLS) [file pcbi.1000970.s009.xls]

## Sheet: Simulation_Conditions
Simulation conditions for Biolog Phenotype Microarrays (PM)
C-source	Plate	Name	Exchange Flux	Limit		Exchange Flux	Limit		Exchange Flux	Limit
arab-L	1A02	L-Arabinose	EX_arab_L_e	-10		EX_nh4_e	-10
acgam	1A03	N-Acetyl-D-glucosamine	EX_acgam_e	-10		EX_nh4_e	-10
glcr	1A04	D-Saccharic Acid	EX_glcr_e	-10		EX_nh4_e	-10
succ	1A05	Succinic Acid	EX_succ_e	-11.3		EX_nh4_e	-10
gal	1A06	D-Galactose	EX_gal_e	-10		EX_nh4_e	-10
asp-L	1A07	L-Aspartic Acid	EX_asp_L_e	-10		EX_nh4_e	-10
pro-L	1A08	L-Proline	EX_pro_L_e	-10		EX_nh4_e	-10
ala-D	1A09	D-Alanine	EX_ala_D_e	-10		EX_nh4_e	-10
tre	1A10	D-Trehalose	EX_tre_e	-10		EX_nh4_e	-10
man	1A11	D-Mannose	EX_man_e	-10		EX_nh4_e	-10
galt	1A12	Dulcitol	EX_galt_e	-10		EX_nh4_e	-10
ser-D	1B01	D-Serine	EX_ser_D_e	-10		EX_nh4_e	-10
sbt-D	1B02	D-Sorbitol	EX_sbt_D_e	-10		EX_nh4_e	-10
glyc	1B03	Glycerol	EX_glyc_e	-11.3		EX_nh4_e	-10
fuc-L	1B04	L-Fucose	EX_fuc_L_e	-10		EX_nh4_e	-10
glcur	1B05	D-Glucuronic Acid	EX_glcur_e	-10		EX_nh4_e	-10
glcn	1B06	D-Gluconic Acid	EX_glcn_e	-10		EX_nh4_e	-10
glyc3p	1B07	D,L-a-Glycerol-Phosphate	EX_glyc3p_e	-10		EX_nh4_e	-10
xyl-D	1B08	D-Xylose	EX_xyl_D_e	-10		EX_nh4_e	-10
lac-L	1B09	L-Lactic Acid	EX_lac_L_e	-10		EX_nh4_e	-10
for	1B10	Formic Acid	EX_for_e	-11.3		EX_nh4_e	-10
mnl	1B11	D-Mannitol	EX_mnl_e	-10		EX_nh4_e	-10
glu-L	1B12	L-Glutamic Acid	EX_glu_L_e	-10		EX_nh4_e	-10
g6p	1C01	D-Glucose-6-Phosphate	EX_g6p_e	-10		EX_nh4_e	-10
galctn-D	1C02	D-Galactonic Acid-g-Lactone	EX_galctn_D_e	-10		EX_nh4_e	-10
mal-L; mal-D	1C03	D,L-Malic Acid	EX_mal_L_e	-10		EX_mal_D_e	-10		EX_nh4_e	-10
rib-D	1C04	D-Ribose	EX_rib_D_e	-11.3		EX_nh4_e	-10
rmn	1C06	L-Rhamnose	EX_rmn_e	-10		EX_nh4_e	-10
fru	1C07	D-Fructose	EX_fru_e	-10		EX_nh4_e	-10
ac	1C08	Acetic Acid	EX_ac_e	-2.5		EX_nh4_e	-10
glc-D	1C09	a-D-Glucose	EX_glc_e	-10		EX_nh4_e	-10
malt	1C10	Maltose	EX_malt_e	-10		EX_nh4_e	-10
melib	1C11	D-Melibiose	EX_melib_e	-10		EX_nh4_e	-10
thymd	1C12	Thymidine	EX_thymd_e	-10		EX_nh4_e	-10
asn-L	1D01	L-Asparagine	EX_asn_L_e	-10		EX_nh4_e	-10
12ppd-S	1D04	1,2-Propanediol	EX_12ppd_S_e	-10		EX_nh4_e	-10
akg	1D06	a-Keto-Glutaric Acid	EX_akg_e	-10		EX_nh4_e	-10
lcts	1D09	a-D-Lactose	EX_lcts_e	-3		EX_nh4_e	-10
sucr	1D11	Sucrose	EX_sucr_e	-10		EX_nh4_e	-10
uri	1D12	Uridine	EX_uri_e	-10		EX_nh4_e	-10
gln-L	1E01	L-Glutamine	EX_gln_L_e	-10		EX_nh4_e	-10
g1p	1E03	D-Glucose-1-Phosphate	EX_g1p_e	-10		EX_nh4_e	-10
f6p	1E04	D-Fructose-6-Phosphate	EX_f6p_e	-10		EX_nh4_e	-10
malttr	1E10	Maltotriose	EX_malttr_e	-10		EX_nh4_e	-10
dad-2	1E11	2-Deoxy Adenosine	EX_dad_2_e	-10		EX_nh4_e	-10
adn	1E12	Adenosine	EX_adn_e	-10		EX_nh4_e	-10
gly;asp-L	1F01	Glycyl-L-Aspartic Acid	EX_gly_e	-10		EX_asp_L_e	-10		EX_nh4_e	-10
cit	1F02	Citric Acid	EX_cit_e	-10		EX_nh4_e	-10
inost	1F03	m-Inositol	EX_inost_e	-10		EX_nh4_e	-10
fum	1F05	Fumaric Acid	EX_fum_e	-10		EX_nh4_e	-10
ppa	1F07	Propionic Acid	EX_ppa_e	-10		EX_nh4_e	-10
galct-D	1F08	Mucic Acid	EX_galct_D_e	-10		EX_nh4_e	-10
glyclt	1F09	Glycolic Acid	EX_glyclt_e	-10		EX_nh4_e	-10
ins	1F12	Inosine	EX_ins_e	-10		EX_nh4_e	-10
gly;glu-L	1G01	Glycyl-L-Glutamic Acid	EX_gly_e	-10		EX_glu_L_e	-10		EX_nh4_e	-10
ser-L	1G03	L-Serine	EX_ser_L_e	-10		EX_nh4_e	-10
thr-L	1G04	L-Threonine	EX_thr_L_e	-10		EX_nh4_e	-10
ala-L	1G05	L-Alanine	EX_ala_L_e	-10		EX_nh4_e	-10
ala-L;gly	1G06	L-Alanyl-Glycine	EX_ala_L_e	-10		EX_gly_e	-10		EX_nh4_e	-10
acac	1G07	Acetoacetic Acid	EX_acac_e	-10		EX_nh4_e	-10
acmana	1G08	N-Acetyl-b-D-Mannosamine	EX_acmana_e	-10		EX_nh4_e	-10
mal-D	1G11	D-Malic Acid	EX_mal_D_e	-10		EX_nh4_e	-10
mal-L	1G12	L-Malic Acid	EX_mal_L_e	-10		EX_nh4_e	-10
gly;pro-L	1H01	Glycyl-L-Proline	EX_gly_e	-10		EX_pro_L_e	-10		EX_nh4_e	-10
tym	1H04	Tyramine	EX_tym_e	-10		EX_nh4_e	-10
lyx-L	1H06	L-Lyxose	EX_lyx_L_e	-10		EX_nh4_e	-10
pyr	1H08	Pyruvic Acid	EX_pyr_e	-11.3		EX_nh4_e	-10
galctn-L	1H09	L-Galactonic Acid-g-Lactone	EX_galctn_L_e	-10		EX_nh4_e	-10
galur	1H10	D-Galacturonic Acid	EX_galur_e	-10		EX_nh4_e	-10
peamn	1H11	Phenylethylamine	EX_peamn_e	-10		EX_nh4_e	-10
etha	1H12	2-Aminoethanol	EX_etha_e	-10		EX_nh4_e	-10
acgal	2B01	N-Acetyl-D-galactosamine	EX_acgal_e	-10		EX_nh4_e	-10
acnam	2B02	N-Acetyl-Neuraminic Acid	EX_acnam_e	-10		EX_nh4_e	-10
all-D	2B03	b-D-Allose	EX_all_D_e	-10		EX_nh4_e	-10
4abut	2D10	g-Amino Butyric Acid	EX_4abut_e	-10		EX_nh4_e	-10
but	2D12	Butyric Acid	EX_but_e	-10		EX_nh4_e	-10
dca	2E01	Capric Acid	EX_dca_e	-10		EX_nh4_e	-10
hxa	2E02	Caproic Acid	EX_hxa_e	-10		EX_nh4_e	-10
5dglcn	2E12	5-Keto-D-Gluconic Acid	EX_5dglcn_e	-10		EX_nh4_e	-10
tartr-L	2F12	L-Tartaric Acid	EX_tartr_L_e	-10		EX_nh4_e	-10
arg-L	2G04	L-Arginine	EX_arg_L_e	-10		EX_nh4_e	-10
gly	2G05	Glycine	EX_gly_e	-10		EX_nh4_e	-10
his-L	2G06	L-Histidine	EX_his_L_e	-10		EX_nh4_e	-10
hom-L	2G07	L-Homoserine	EX_hom_L_e	-10		EX_nh4_e	-10
ile-L	2G09	L-Isoleucine	EX_ile_L_e	-10		EX_nh4_e	-10
leu-L	2G10	L-Leucine	EX_leu_L_e	-10		EX_nh4_e	-10
lys-L	2G11	L-Lysine	EX_lys_L_e	-10		EX_nh4_e	-10
met-L	2G12	L-Methionine	EX_met_L_e	-10		EX_nh4_e	-10
orn	2H01	L-Ornithine	EX_orn_e	-10		EX_nh4_e	-10
phe-L	2H02	L-Phenylalanine	EX_phe_L_e	-10		EX_nh4_e	-10
val-L	2H04	L-Valine	EX_val_L_e	-10		EX_nh4_e	-10
crn	2H05	D,L-Carnitine	EX_crn_e	-10		EX_nh4_e	-10
ptrc	2H08	Putrescine	EX_ptrc_e	-10		EX_nh4_e	-10
dha	2H09	Dihydroxy Acetone	EX_dha_e	-10		EX_nh4_e	-10
N-source	Plate	Name	Exchange Flux	Limit		Exchange Flux	Limit		Exchange Flux	Limit
nh4	3A02	Ammonia	EX_nh4_e	-10		EX_pyr_e	-11.3
no2	3A03	Nitrite	EX_no2_e	-10		EX_pyr_e	-11.3
no3	3A04	Nitrate	EX_no3_e	-10		EX_pyr_e	-11.3
urea	3A05	Urea	EX_urea_e	-10		EX_pyr_e	-11.3
ala-L	3A07	L-Alanine	EX_ala_L_e	-10		EX_pyr_e	-11.3
arg-L	3A08	L-Arginine	EX_arg_L_e	-10		EX_pyr_e	-11.3
asn-L	3A09	L-Asparagine	EX_asn_L_e	-10		EX_pyr_e	-11.3
asp-L	3A10	L-Aspartic Acid	EX_asp_L_e	-10		EX_pyr_e	-11.3
cys-L	3A11	L-Cysteine	EX_cys_L_e	-10		EX_pyr_e	-11.3
glu-L	3A12	L-Glutamic Acid	EX_glu_L_e	-10		EX_pyr_e	-11.3
gln-L	3B01	L-Glutamine	EX_gln_L_e	-10		EX_pyr_e	-11.3
gly	3B02	Glycine	EX_gly_e	-10		EX_pyr_e	-11.3
his-L	3B03	L-Histidine	EX_his_L_e	-10		EX_pyr_e	-11.3
ile-L	3B04	L-Isoleucine	EX_ile_L_e	-10		EX_pyr_e	-11.3
leu-L	3B05	L-Leucine	EX_leu_L_e	-10		EX_pyr_e	-11.3
lys-L	3B06	L-Lysine	EX_lys_L_e	-10		EX_pyr_e	-11.3
met-L	3B07	L-Methionine	EX_met_L_e	-10		EX_pyr_e	-11.3
phe-L	3B08	L-Phenylalanine	EX_phe_L_e	-10		EX_pyr_e	-11.3
pro-L	3B09	L-Proline	EX_pro_L_e	-10		EX_pyr_e	-11.3
ser-L	3B10	L-Serine	EX_ser_L_e	-10		EX_pyr_e	-11.3
thr-L	3B11	L-Threonine	EX_thr_L_e	-10		EX_pyr_e	-11.3
trp-L	3B12	L-Tryptophan	EX_trp_L_e	-10		EX_pyr_e	-11.3
tyr-L	3C01	L-Tyrosine	EX_tyr_L_e	-10		EX_pyr_e	-11.3
val-L	3C02	L-Valine	EX_val_L_e	-10		EX_pyr_e	-11.3
ala-D	3C03	D-Alanine	EX_ala_D_e	-10		EX_pyr_e	-11.3
ser-D	3C08	D-Serine	EX_ser_D_e	-10		EX_pyr_e	-11.3
hom-L	3C11	L-Homoserine	EX_hom_L_e	-10		EX_pyr_e	-11.3
orn	3C12	L-Ornithine	EX_orn_e	-10		EX_pyr_e	-11.3
etha	3D09	Ethanolamine	EX_etha_e	-10		EX_pyr_e	-11.3
ptrc	3D11	Putrescine	EX_ptrc_e	-10		EX_pyr_e	-11.3
agm	3D12	Agmatine	EX_agm_e	-10		EX_pyr_e	-11.3
peamn	3E02	b-Phenylethylamine	EX_peamn_e	-10		EX_pyr_e	-11.3
tym	3E03	Tyramine	EX_tym_e	-10		EX_pyr_e	-11.3
gam	3E08	D-Glucosamine	EX_gam_e	-10		EX_pyr_e	-11.3
acgam	3E11	N-Acetyl-D-glucosamine	EX_acgam_e	-10		EX_pyr_e	-11.3
acgal	3E12	N-Acetyl-D-Galactosamine	EX_acgal_e	-10		EX_pyr_e	-11.3
acmana	3F01	N-Acetyl-D-mannosamine	EX_acmana_e	-10		EX_pyr_e	-11.3
ade	3F02	Adenine	EX_ade_e	-10		EX_pyr_e	-11.3
adn	3F03	Adenosine	EX_adn_e	-10		EX_pyr_e	-11.3
cytd	3F04	Cytidine	EX_cytd_e	-10		EX_pyr_e	-11.3
csn	3F05	Cytosine	EX_csn_e	-10		EX_pyr_e	-11.3
gua	3F06	Guanine	EX_gua_e	-10		EX_pyr_e	-11.3
gsn	3F07	Guanosine	EX_gsn_e	-10		EX_pyr_e	-11.3
thym	3F08	Thymine	EX_thym_e	-10		EX_pyr_e	-11.3
thymd	3F09	Thymidine	EX_thymd_e	-10		EX_pyr_e	-11.3
ura	3F10	Uracil	EX_ura_e	-10		EX_pyr_e	-11.3
uri	3F11	Uridine	EX_uri_e	-10		EX_pyr_e	-11.3
ins	3F12	Inosine	EX_ins_e	-10		EX_pyr_e	-11.3
xan	3G01	Xanthine	EX_xan_e	-10		EX_pyr_e	-11.3
xtsn	3G02	Xanthosine	EX_xtsn_e	-10		EX_pyr_e	-11.3
alltn	3G05	Allantoin	EX_alltn_e	-10		EX_pyr_e	-11.3
ala-L;asp-L	3H01	Ala-Asp	EX_ala_L_e	-10		EX_asp_L_e	-10		EX_pyr_e	-11.3
ala-L;gln-L	3H02	Ala-Gln	EX_ala_L_e	-10		EX_gln_L_e	-10		EX_pyr_e	-11.3
ala-L;glu-L	3H03	Ala-Glu	EX_ala_L_e	-10		EX_glu_L_e	-10		EX_pyr_e	-11.3
ala-L;gly	3H04	Ala-Gly	EX_ala_L_e	-10		EX_gly_e	-10		EX_pyr_e	-11.3
ala-L;his-L	3H05	Ala-His	EX_ala_L_e	-10		EX_his_L_e	-10		EX_pyr_e	-11.3
ala-L;leu-L	3H06	Ala-Leu	EX_ala_L_e	-10		EX_leu_L_e	-10		EX_pyr_e	-11.3
ala-L;thr-L	3H07	Ala-Thr	EX_ala_L_e	-10		EX_thr_L_e	-10		EX_pyr_e	-11.3
gly;asn-L	3H08	Gly-Asn	EX_gly_e	-10		EX_asn_L_e	-10		EX_pyr_e	-11.3
gly;gln-L	3H09	Gly-Gln	EX_gly_e	-10		EX_gln_L_e	-10		EX_pyr_e	-11.3
gly;glu-L	3H10	Gly-Glu	EX_gly_e	-10		EX_glu_L_e	-10		EX_pyr_e	-11.3
gly;met-L	3H11	Gly-Met	EX_gly_e	-10		EX_met_L_e	-10		EX_pyr_e	-11.3
ala-L;met-L	3H12	Met-Ala	EX_ala_L_e	-10		EX_met_L_e	-10		EX_pyr_e	-11.3
Simulation conditions for Biolog GN2-MicroPlate
C-source	Plate	Name	Exchange Flux	Limit		Exchange Flux	Limit		Exchange Flux	Limit
acgam	A08	N-Acetyl-D-glucosamine	EX_acgam_e	-10		EX_nh4_e	-10
fru	B02	D-Fructose	EX_fru_e	-10		EX_nh4_e	-10
fuc-L	B03	L-Fucose	EX_fuc_L_e	-10		EX_nh4_e	-10
gal	B04	D-Galactose	EX_gal_e	-10		EX_nh4_e	-10
glc-D	B06	a-D-Glucose	EX_glc_e	-10		EX_nh4_e	-10
malt	B10	Maltose	EX_malt_e	-10		EX_nh4_e	-10
mnl	B11	D-Mannitol	EX_mnl_e	-10		EX_nh4_e	-10
man	B12	D-Mannose	EX_man_e	-10		EX_nh4_e	-10
sbt-D	C06	D-Sorbitol	EX_sbt_D_e	-10		EX_nh4_e	-10
tre	C08	D-Trehalose	EX_tre_e	-10		EX_nh4_e	-10
ac	D01	Acetic Acid	EX_ac_e	-2.5		EX_nh4_e	-10
galctn-D	D05	D-Galactonic Acid-g-Lactone	EX_galctn_D_e	-10		EX_nh4_e	-10
galur	D06	D-Galacturonic Acid	EX_galur_e	-10		EX_nh4_e	-10
glcn	D07	D-Gluconic Acid	EX_glcn_e	-10		EX_nh4_e	-10
glcur	D09	D-Glucuronic Acid	EX_glcur_e	-10		EX_nh4_e	-10
akg	E04	a-Keto-Glutaric Acid	EX_akg_e	-10		EX_nh4_e	-10
lac-D;lac-L	E06	D,L-Lactic Acid	EX_lac_L_e	-10		EX_lac_D_e	-10		EX_nh4_e	-10
succ	E12	Succinic Acid	EX_succ_e	-11.3		EX_nh4_e	-10
ala-L	F06	L-Alanine	EX_ala_L_e	-10		EX_nh4_e	-10
ala-L;gly	F07	L-Alanyl-Glycine	EX_ala_L_e	-10		EX_gly_e	-10		EX_nh4_e	-10
asn-L	F08	L-Asparagine	EX_asn_L_e	-10		EX_nh4_e	-10
asp-L	F09	L-Aspartic Acid	EX_asp_L_e	-10		EX_nh4_e	-10
gly;asp-L	F11	Glycyl-L-Aspartic Acid	EX_gly_e	-10		EX_asp_L_e	-10		EX_nh4_e	-10
ser-D	G08	D-Serine	EX_ser_D_e	-10		EX_nh4_e	-10
ser-L	G09	L-Serine	EX_ser_L_e	-10		EX_nh4_e	-10
ins	H02	Inosine	EX_ins_e	-10		EX_nh4_e	-10
uri	H03	Uridine	EX_uri_e	-10		EX_nh4_e	-10
thymd	H04	Thymidine	EX_thymd_e	-10		EX_nh4_e	-10
glyc	H09	Glycerol	EX_glyc_e	-11.3		EX_nh4_e	-10
glyc3p	H10	D,L-a-Glycerol-Phosphate	EX_glyc3p_e	-10		EX_nh4_e	-10
g1p	H11	D-Glucose-1-Phosphate	EX_g1p_e	-10		EX_nh4_e	-10
g6p	H12	D-Glucose-6-Phosphate	EX_g6p_e	-10		EX_nh4_e	-10
Common conditions for iJR904 metabolic model
Metabolite		Name	Exchange Flux	Limit
co2		Carbon Dioxide	EX_co2_e	-1000
h2o		Water	EX_h2o_e	-1000
h		Proton	EX_h_e	-1000
k		Potassium	EX_k_e	-1000
o2		Oxygen	EX_o2_e	-10
pi		Phosphate	EX_pi_e	-10
so4		Sulfate	EX_so4_e	-10
Common conditions for iAF1260 metabolic model
Metabolite		Name	Exchange Flux	Limit
ca2		Calcium	EX_ca2_e	-1000
cbl1		Cob(I)alamin	EX_cbl1_e	0.01
cl		Chloride	EX_cl_e	-1000
co2		Carbon Dioxide	EX_co2_e	-1000
cobalt2		Cobalt(II)	EX_cobalt2_e	-1000
cu2		Copper(II)	EX_cu2_e	-1000
fe2		Iron(II)	EX_fe2_e	-1000
fe3		Iron(III)	EX_fe3_e	-1000
h		Proton	EX_h_e	-1000
h2o		Water	EX_h2o_e	-1000
k		Potassium	EX_k_e	-1000
mg2		Magnesium	EX_mg2_e	-1000
mn2		Manganese(II)	EX_mn2_e	-1000
mobd		Molybdate	EX_mobd_e	-1000
na1		Sodium	EX_na1_e	-1000
o2		Oxygen	EX_o2_e	-10
pi		Phosphate	EX_pi_e	-10
so4		Sulfate	EX_so4_e	-10
tungs		Tungstate	EX_tungs_e	-1000
zn2		Zinc	EX_zn2_e	-1000
